# Supplementary material
Source: Research Square preprint supplement (doi:10.21203/rs.3.rs-8916489/v1)
Supplement: Supplementary file 1 [file 8a03977b33f9e7829866f8dc.docx]

**SUPPORTING INFORMATION**

Generative Model-Guided Discovery of Amino Quinoxaline Scaffold as a Novel RET Alteration Inhibitor with Exploration of the Cryptic Pocket

Surendra Kumar$, Vinay Pogaku$, Mi-Hyun Kim*

*Gachon Institute of Pharmaceutical Science & Department of Pharmacy, College of Pharmacy, Gachon University, 191 Hambakmoeiro, Yeonsu-gu, Incheon, Republic of Korea*

$Contributed equally

*Corresponding author: [kmh0515@gachon.ac.kr](mailto:kmh0515@gachon.ac.kr)

| *Figure S1* | *Pg. 2* |
| --- | --- |
| *Figure S2* | *Pg. 3* |
| *Figure S3* | *Pg. 4* |
| *Figure S4* | *Pg. 5* |
| *Figure S5* | *Pg. 6* |
| *Figure S6* | *Pg. 7* |
| *Table S1* | *Pg. 8* |
| *Figure S7* | *Pg. 9* |
| *Figure S8* | *Pg. 10* |
| *Figure S9* | *Pg. 11* |
| *Table S2* | *Pg. 12* |
| *Figure S10* | *Pg. 13* |
| *Figure S11* | *Pg. 14* |
| *Figure S12* | *Pg. 15* |
| *Figure S13* | *Pg. 16* |
| *Table S3* | *Pg. 17* |
| *Figure S14* | *Pg. 18* |
| *Figure S15* | *Pg. 19* |
| *Table S4* | *Pg. 20-23* |
| *Table S5* | *Pg. 24-26* |
| *Figure S16* | *Pg. 27-28* |
| *Table S6* | *Pg. 29-72* |
| *Table S7* | *Pg. 73-74* |


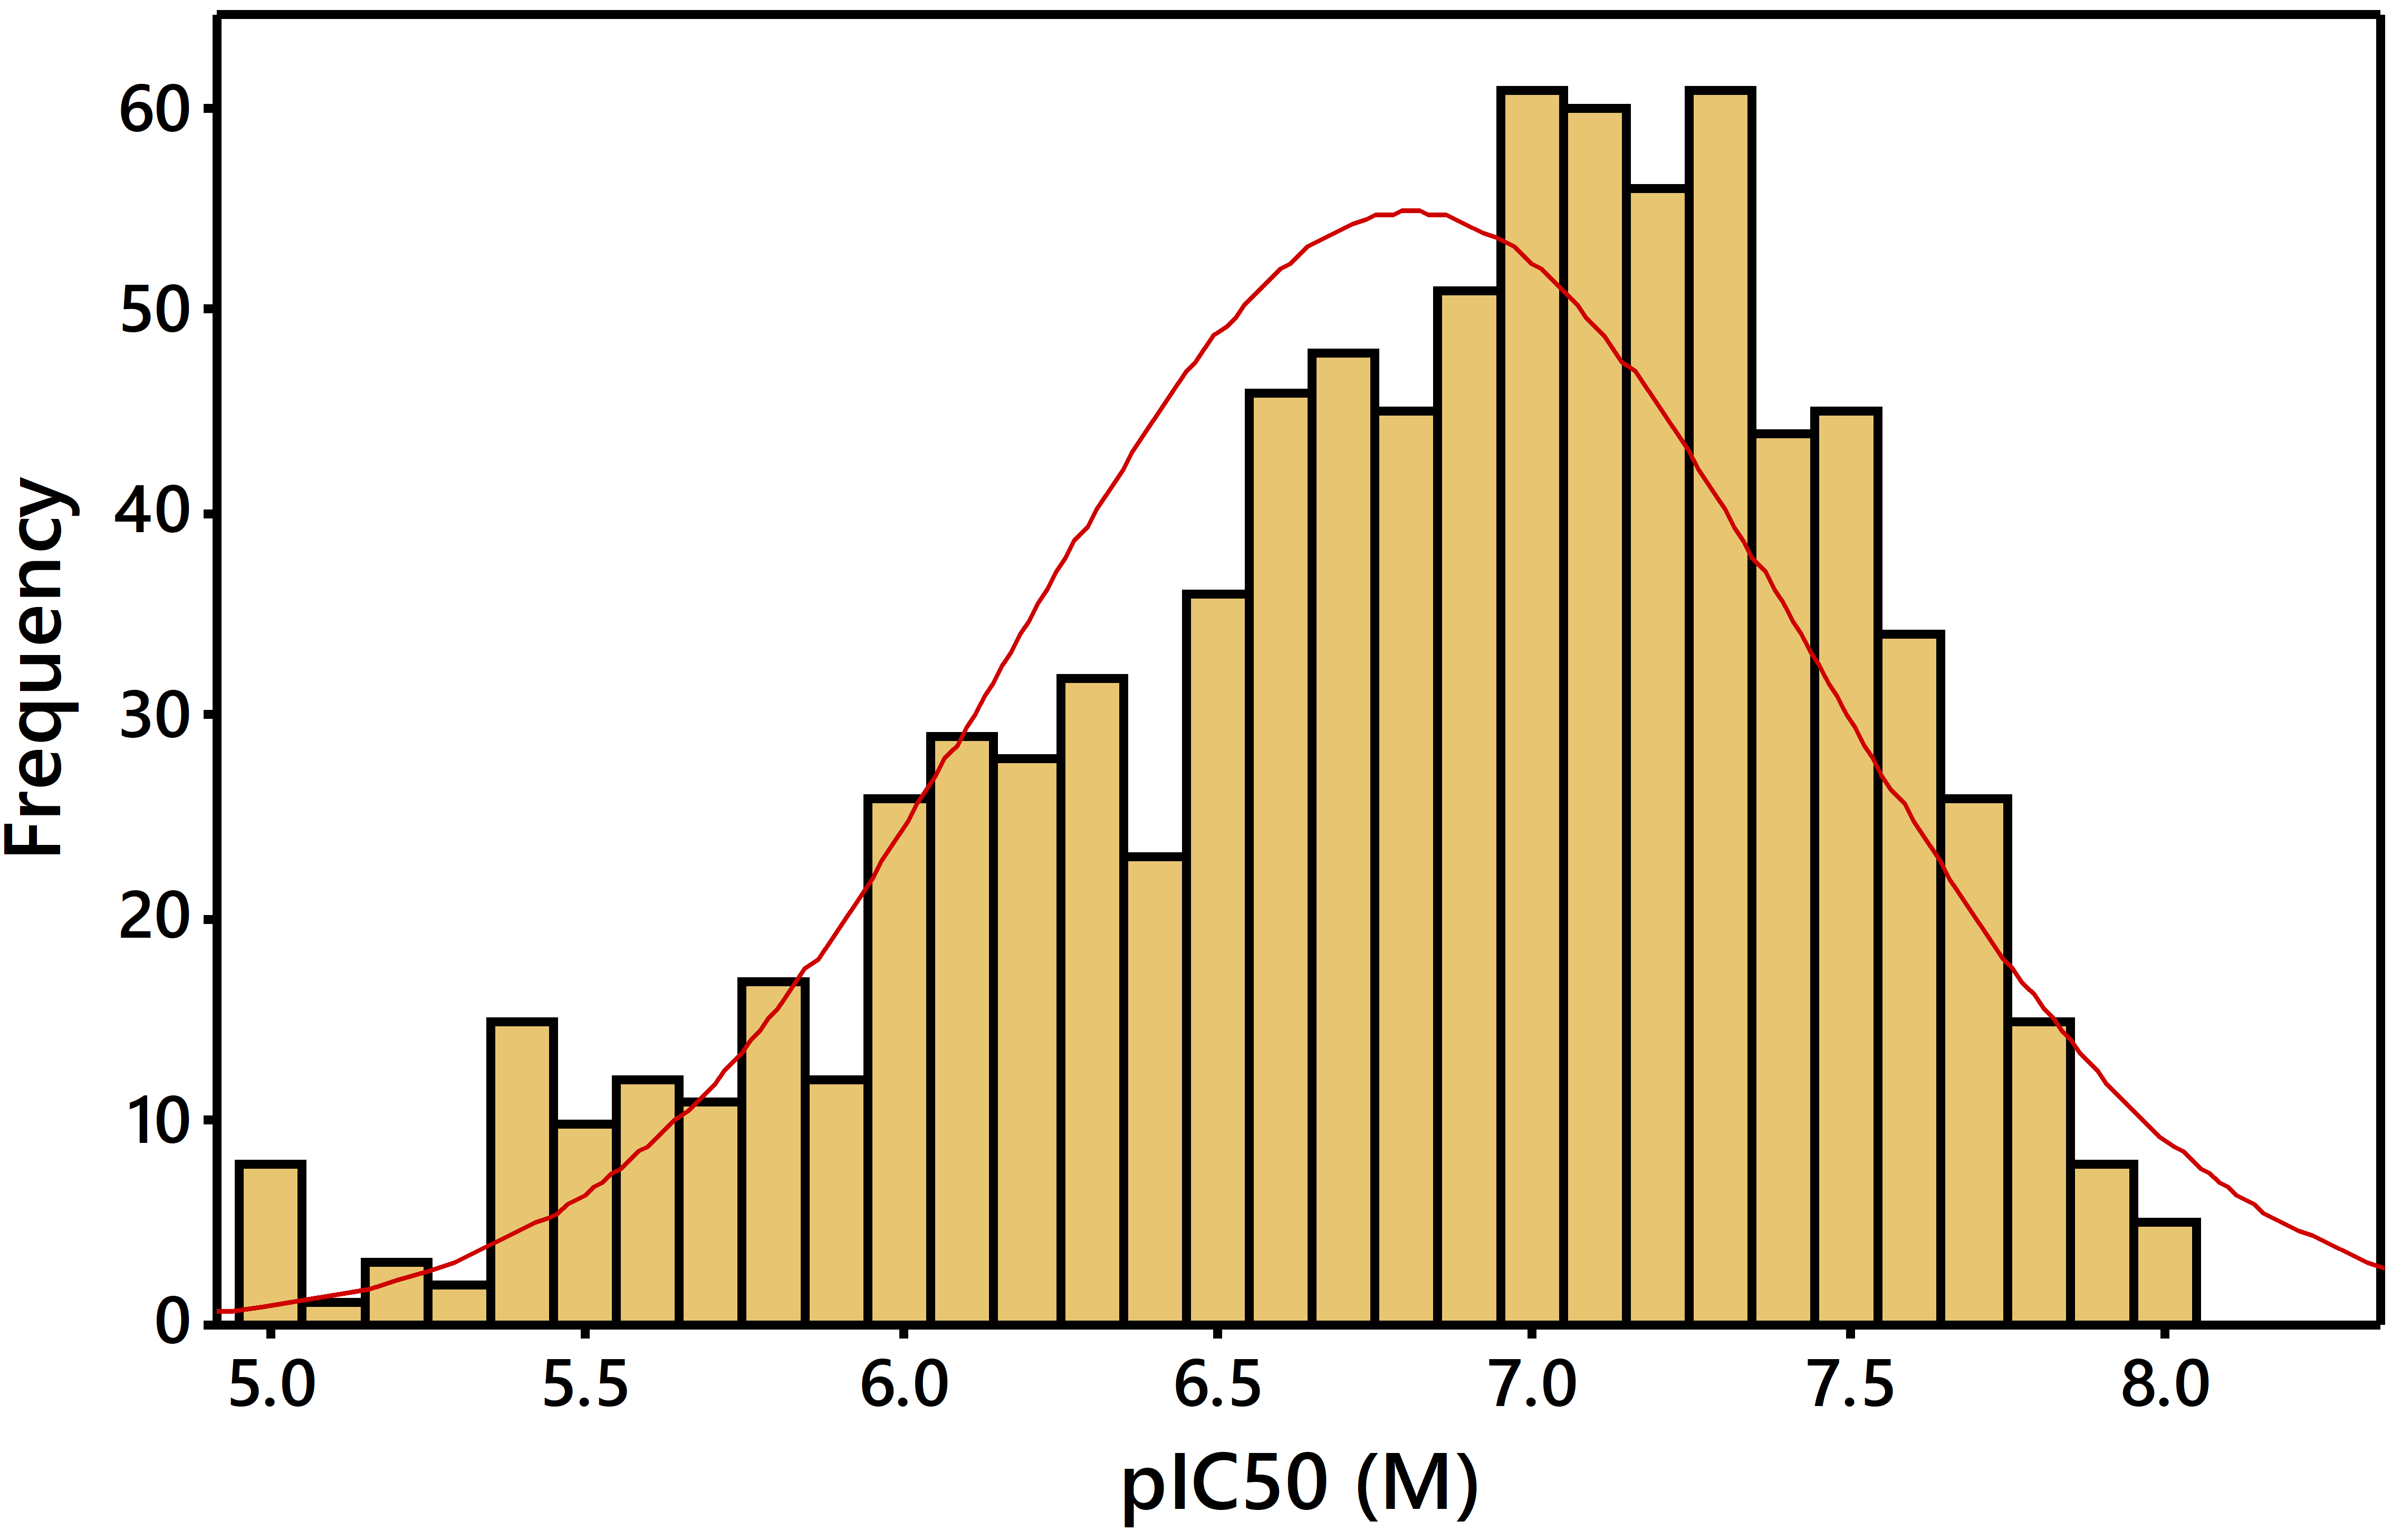


**Figure S1.** Bioactivity Distribution of RET-G810R Inhibitor Dataset

Frequency distribution of pIC50 (M) values for the 870 molecules in the RET-G810R inhibitor dataset. The bioactivity data follows an approximately near-normal distribution (red curve overlay) centered around pIC50 = 7.0 M, with values ranging from 5.0 to 8.0. This well-balanced distribution with adequate representation across the potency range is suitable for robust QSAR model development, with the majority of compounds exhibiting moderate to high potency (pIC50 > 6.5), reflecting the focused nature of Array BioPharma Inc.'s kinase inhibitor optimization program.





**Figure S2.** BindingDB database curation workflow for multi-kinase model generation.

(Top) Sequential filtering pipeline illustrating the comprehensive curation of raw BindingDB bioactivity data to generate a multi-kinase binding affinity dataset. The workflow begins with 3.06 million multi-target binding entries from the BindingDB database. Progressive filtering steps systematically include: identification and selection of multi-kinase targets (663,103 entries), restriction to human Homo sapiens proteins (497,205 entries), and application of stringent data-quality thresholds (>5,000 bioactivity points per target), yielding a final curated dataset of 188,217 entries representing 23 distinct multi-kinase targets. (Bottom) Bar chart presenting the final distribution of bioactive molecules across all kinase targets, ranging from approximately 2,200 to 22,741 compounds per target.





**Figure S3.** Curation workflow for NSCLC drug sensitivity dataset from multi-tissue GDSC database for Phenotype Model Development. (Left) Comprehensive overview of cancer types represented in the Genomics of Drug Sensitivity in Cancer (GDSC) database, spanning multiple tissues including lung, breast, blood, gastrointestinal, endocrine, and other cancer types. (Center) Sequential filtering pipeline extracting NSCLC-specific data: filtering from the comprehensive Multi-Tissues & Drug Cancer Database containing 1,395,335 GDSC entries to NSCLC-focused dataset with 64,675 entries. (Bottom) Representative data table displaying drug sensitivity profiles for Erlotinib across NSCLC cell lines, including pharmacological metrics (IC50, AUC, RMSE, Z-score) and TCGA classification information.


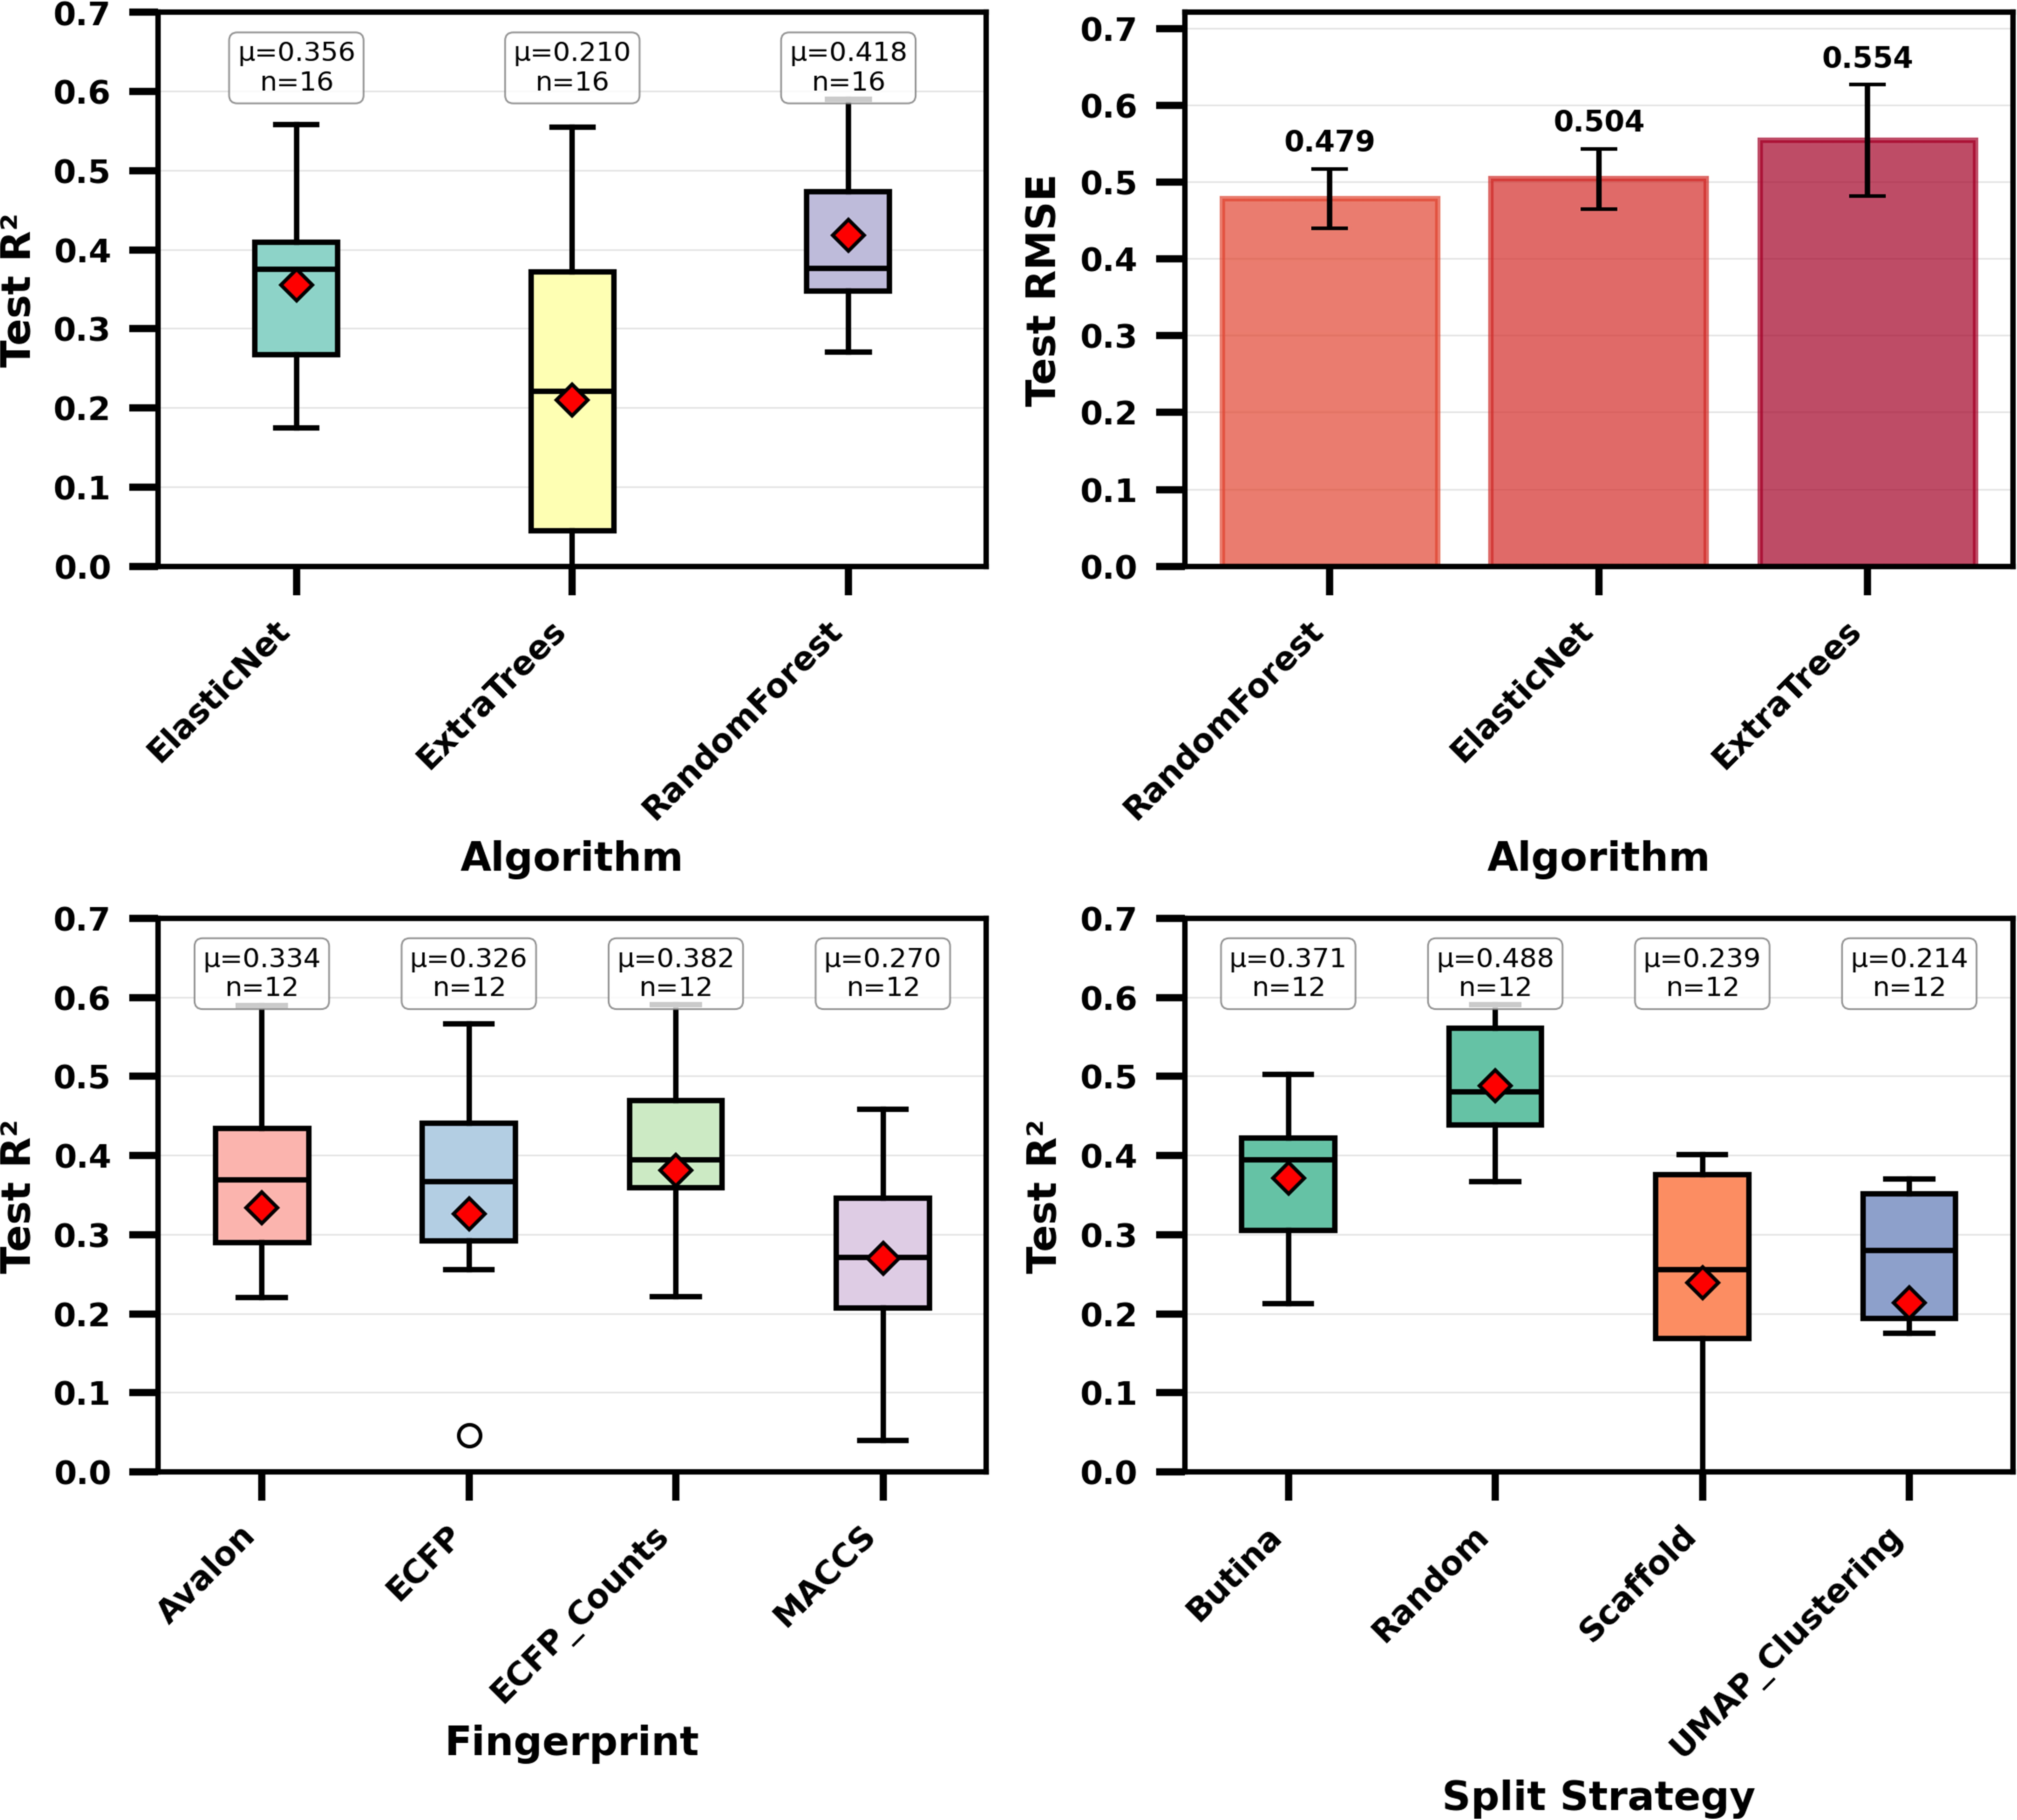


**Figure S4.** QSAR Model Performance Analysis Across Multiple Parameters.

Performance evaluation of regression models for RET-G810R inhibitor prediction. (Top Left) Test R2 distribution by algorithm showing RandomForest (μ=0.418, n=16) outperforms ElasticNet (μ=0.356) and ExtraTrees (μ=0.210). (Top Right) Mean test RMSE (±SD) by algorithm, with ElasticNet showing lowest error (0.479) and ExtraTrees highest (0.554). (Bottom Left) Test R2 distribution by fingerprint type (n=12 each), with ECFP Counts achieving best performance (μ=0.382). (Bottom Right) Test R2 distribution by data splitting strategy (n=12 each), where Random split (μ=0.488) significantly outperforms scaffold-based and clustering approaches. Box plots show median (line), mean (diamond), interquartile range (box), and data range (whiskers).


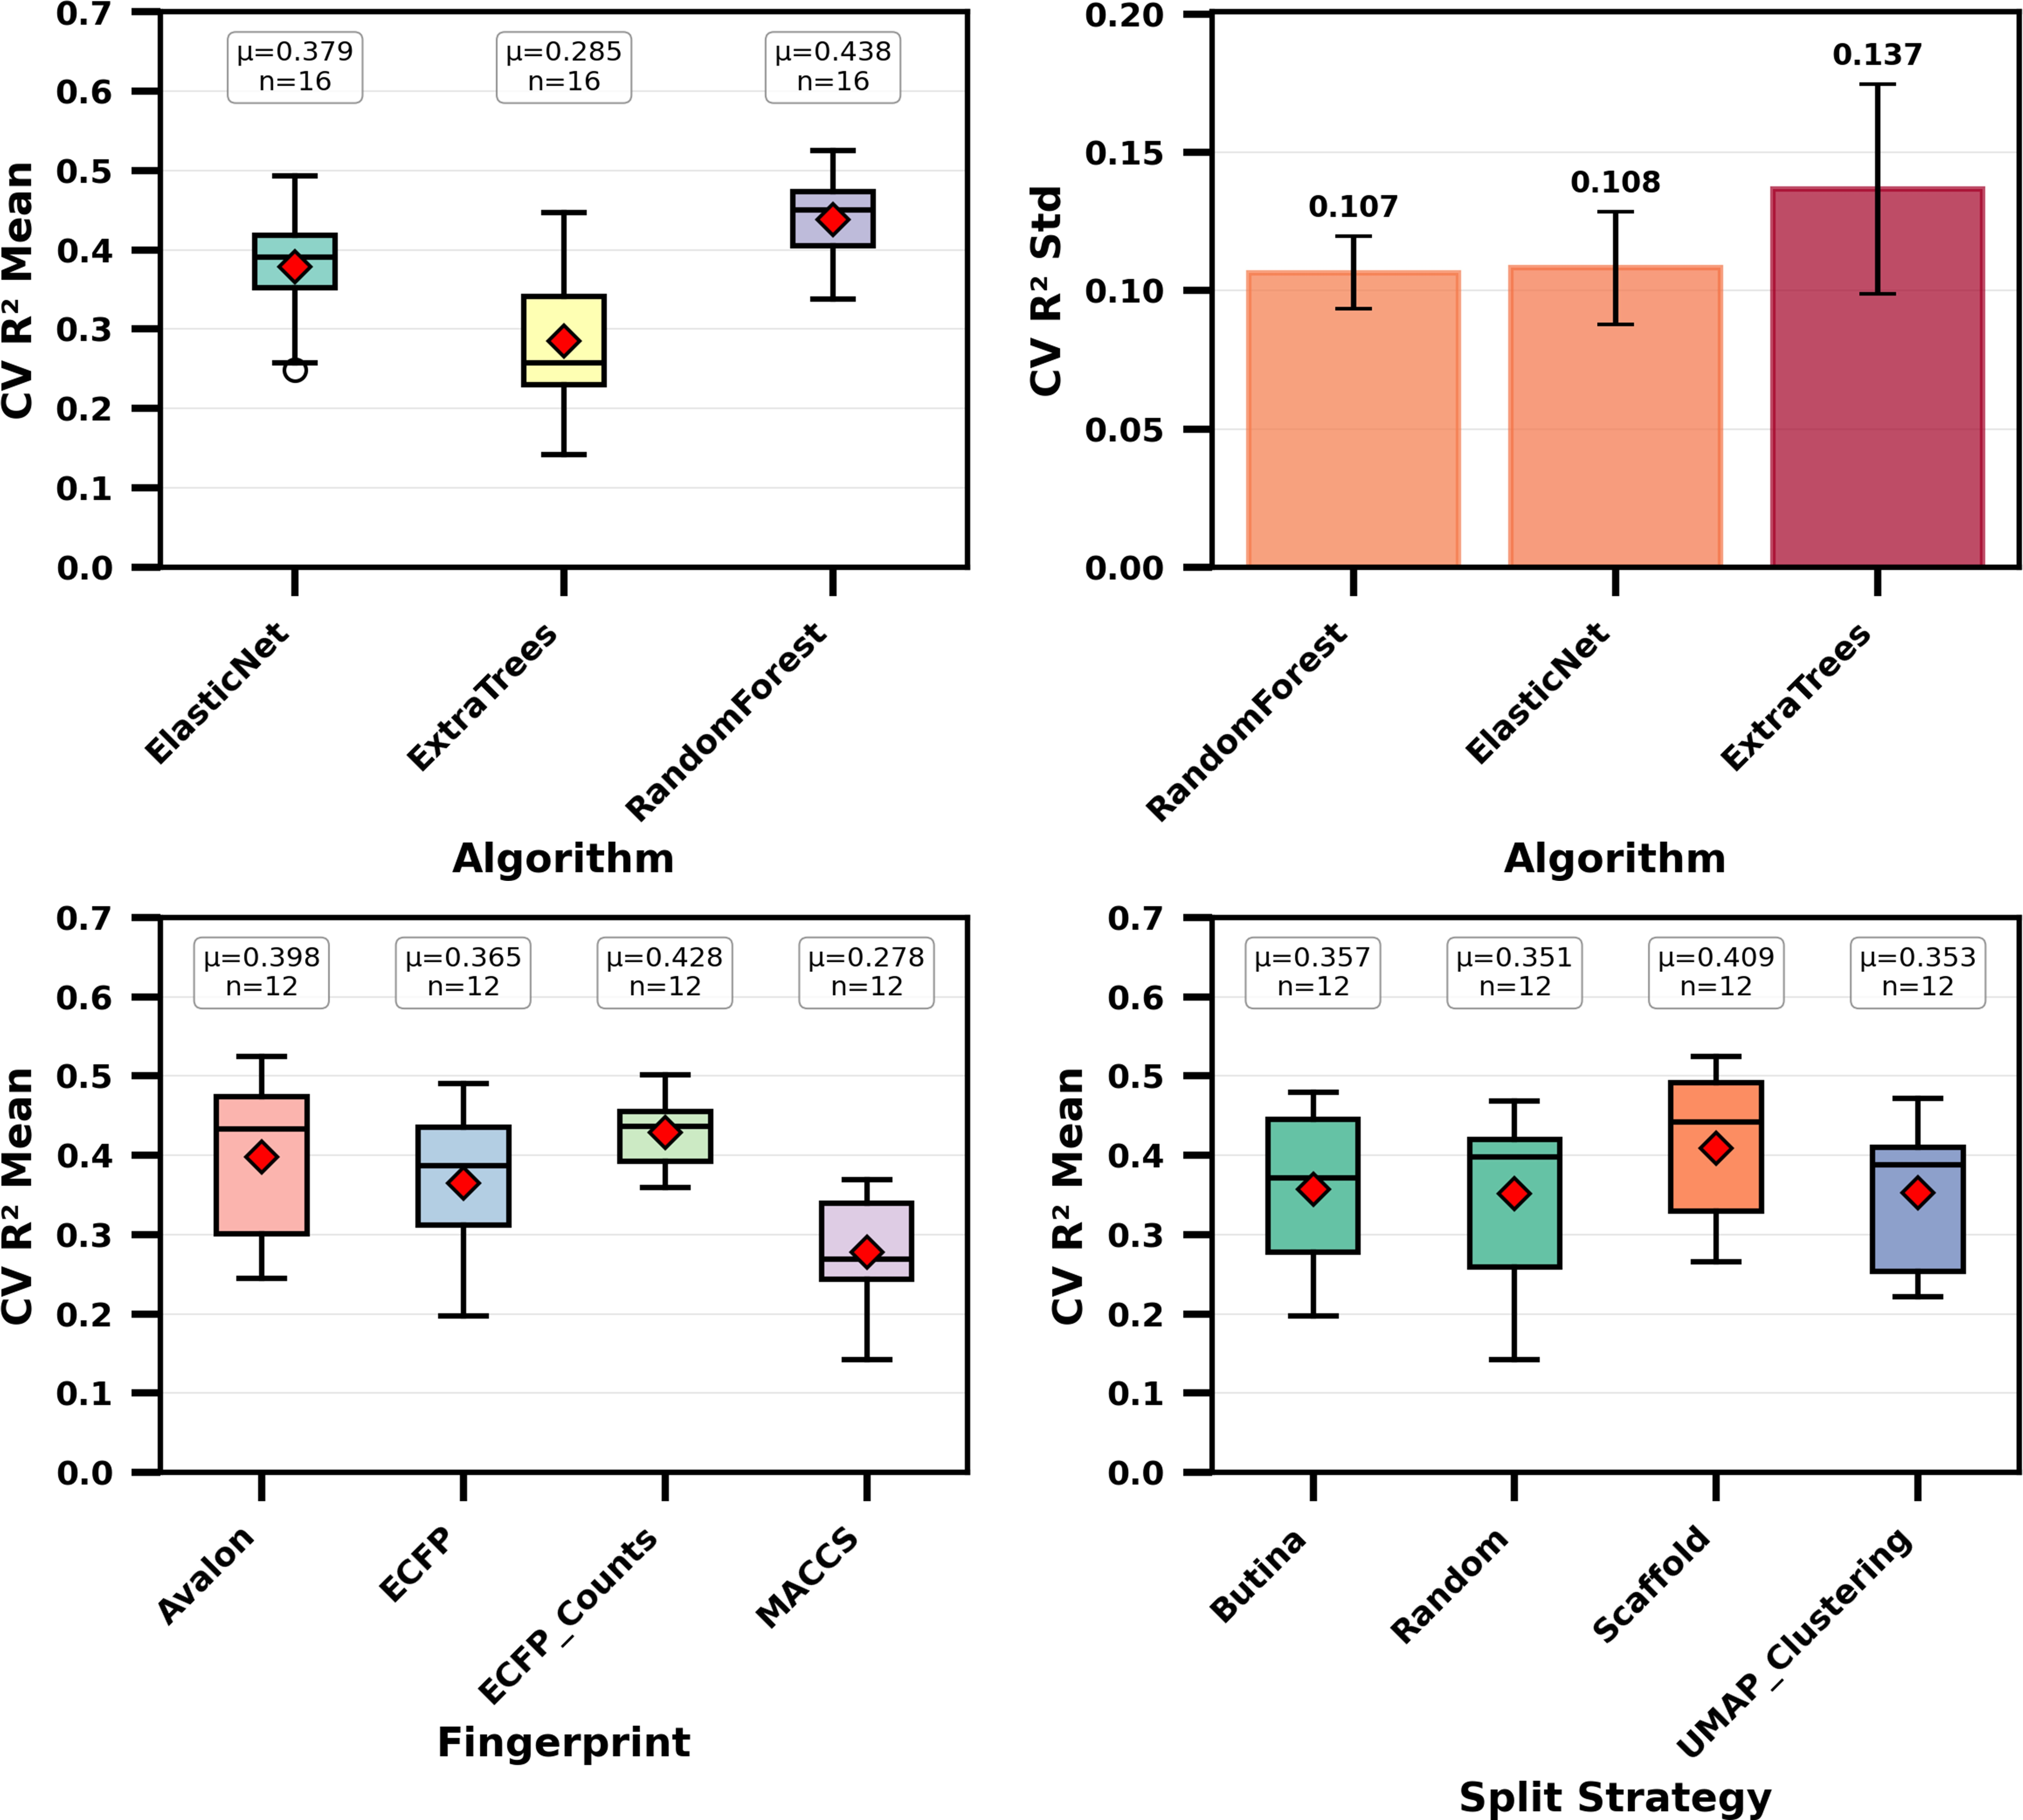


**Figure S5.** QSAR Model Performance Analysis - Cross-Validation Metrics.

Cross-validation performance assessment of QSAR regression models for RET-G810R inhibitor prediction. (Top Left) Mean CV R2 distribution by algorithm (n=16 each), with RandomForest achieving highest performance (μ=0.438) compared to ElasticNet (μ=0.379) and ExtraTrees (μ=0.285). (Top Right) Mean CV R2 standard deviation by algorithm, indicating model stability across folds. ExtraTrees shows highest variability (0.137), while RandomForest and ElasticNet demonstrate more consistent performance (0.107-0.108). (Bottom Left) Mean CV R2 distribution by fingerprint type (n=12 each), with ECFP Counts showing best performance (μ=0.428), followed by Avalon (μ=0.398) and ECFP (μ=0.365). MACCS keys exhibit lowest performance (μ=0.278). (Bottom Right) Mean CV R2 distribution by data splitting strategy (n=12 each), with scaffold split achieving highest cross-validation performance (μ=0.409), indicating good generalization to novel chemical scaffolds. Box plots display median (line), mean (diamond), interquartile range (box), and data range (whiskers).


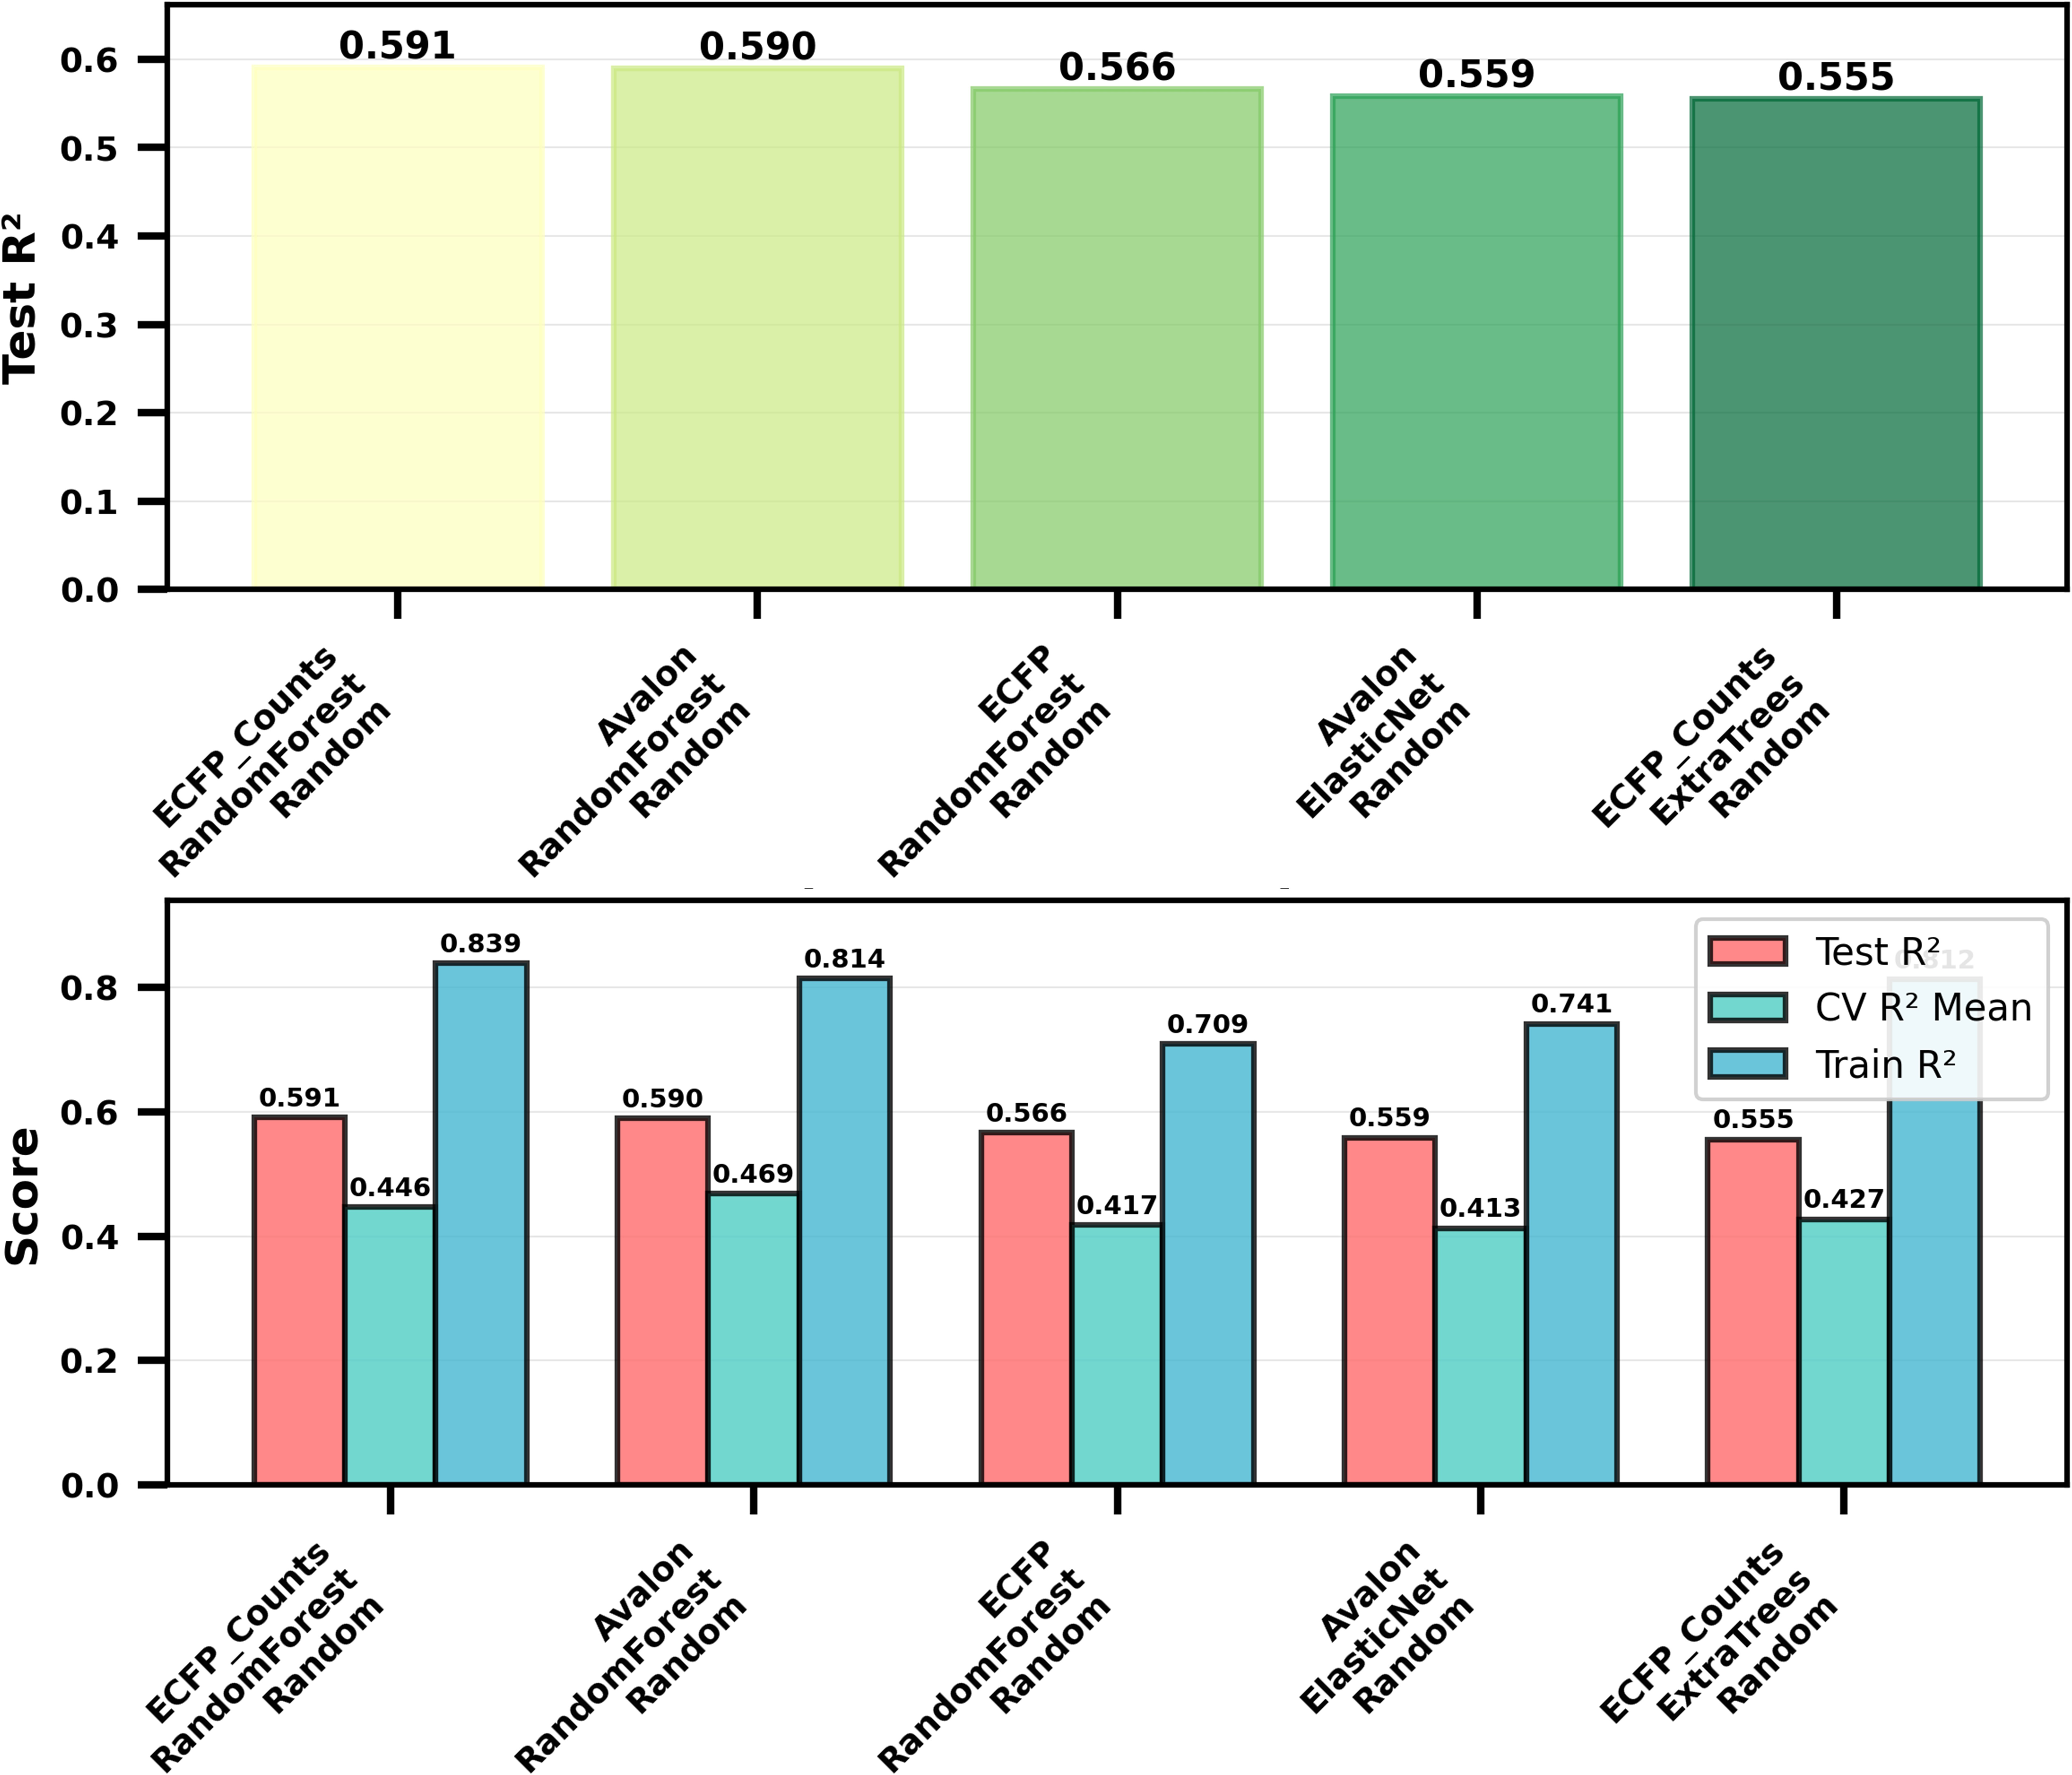


**Figure S6.** Top 5 Performing QSAR Models.

Performance comparison of the five best QSAR models for RET-G810R prediction. (Top) Test R2 rankings showing ECFP Counts-RandomForest-Random as the best model (0.591). (Bottom) multi-metric comparison of top models across Test R2 (pink), CV R2 Mean (green), and Train R2 (blue). All models show strong performance (Test R²>0.55, CV R2>0.44), with the top-ranked model demonstrating balanced metrics across training and testing, supporting its selection for final deployment.

**Table S1.** Top 5 Performing QSAR Models.

| Split Type | Fingerprint | Algorithm | Test R2 | TestRMSE | TestMAE | CV R2(mean) | CV R2(std) | Train R2 | Needs Scaling | Best Params |
| --- | --- | --- | --- | --- | --- | --- | --- | --- | --- | --- |
| Random | ECFP_Counts | RandomForest | 0.5906 | 0.4078 | 0.3079 | 0.4464 | 0.1213 | 0.8386 | FALSE | {'max_depth': 18, 'min_samples_leaf': 2, 'min_samples_split': 6, 'n_estimators': 364} |
| Random | Avalon | RandomForest | 0.5897 | 0.4083 | 0.3113 | 0.4687 | 0.1146 | 0.8138 | FALSE | {'max_depth': 17, 'min_samples_leaf': 2, 'min_samples_split': 9, 'n_estimators': 303} |
| Random | ECFP | RandomForest | 0.5664 | 0.4197 | 0.3150 | 0.4174 | 0.1010 | 0.7094 | FALSE | {'max_depth': 20, 'min_samples_leaf': 4, 'min_samples_split': 10, 'n_estimators': 322} |
| Random | Avalon | ElasticNet | 0.5586 | 0.4235 | 0.3182 | 0.4126 | 0.0867 | 0.7413 | TRUE | {'alpha': np.float64(0.019167639006854163), 'l1_ratio': np.float64(0.435157372170605)} |
| Random | ECFP_Counts | ExtraTrees | 0.5555 | 0.4250 | 0.3165 | 0.4273 | 0.1075 | 0.8122 | FALSE | {'max_depth': 20, 'min_samples_leaf': 4, 'min_samples_split': 10, 'n_estimators': 322} |


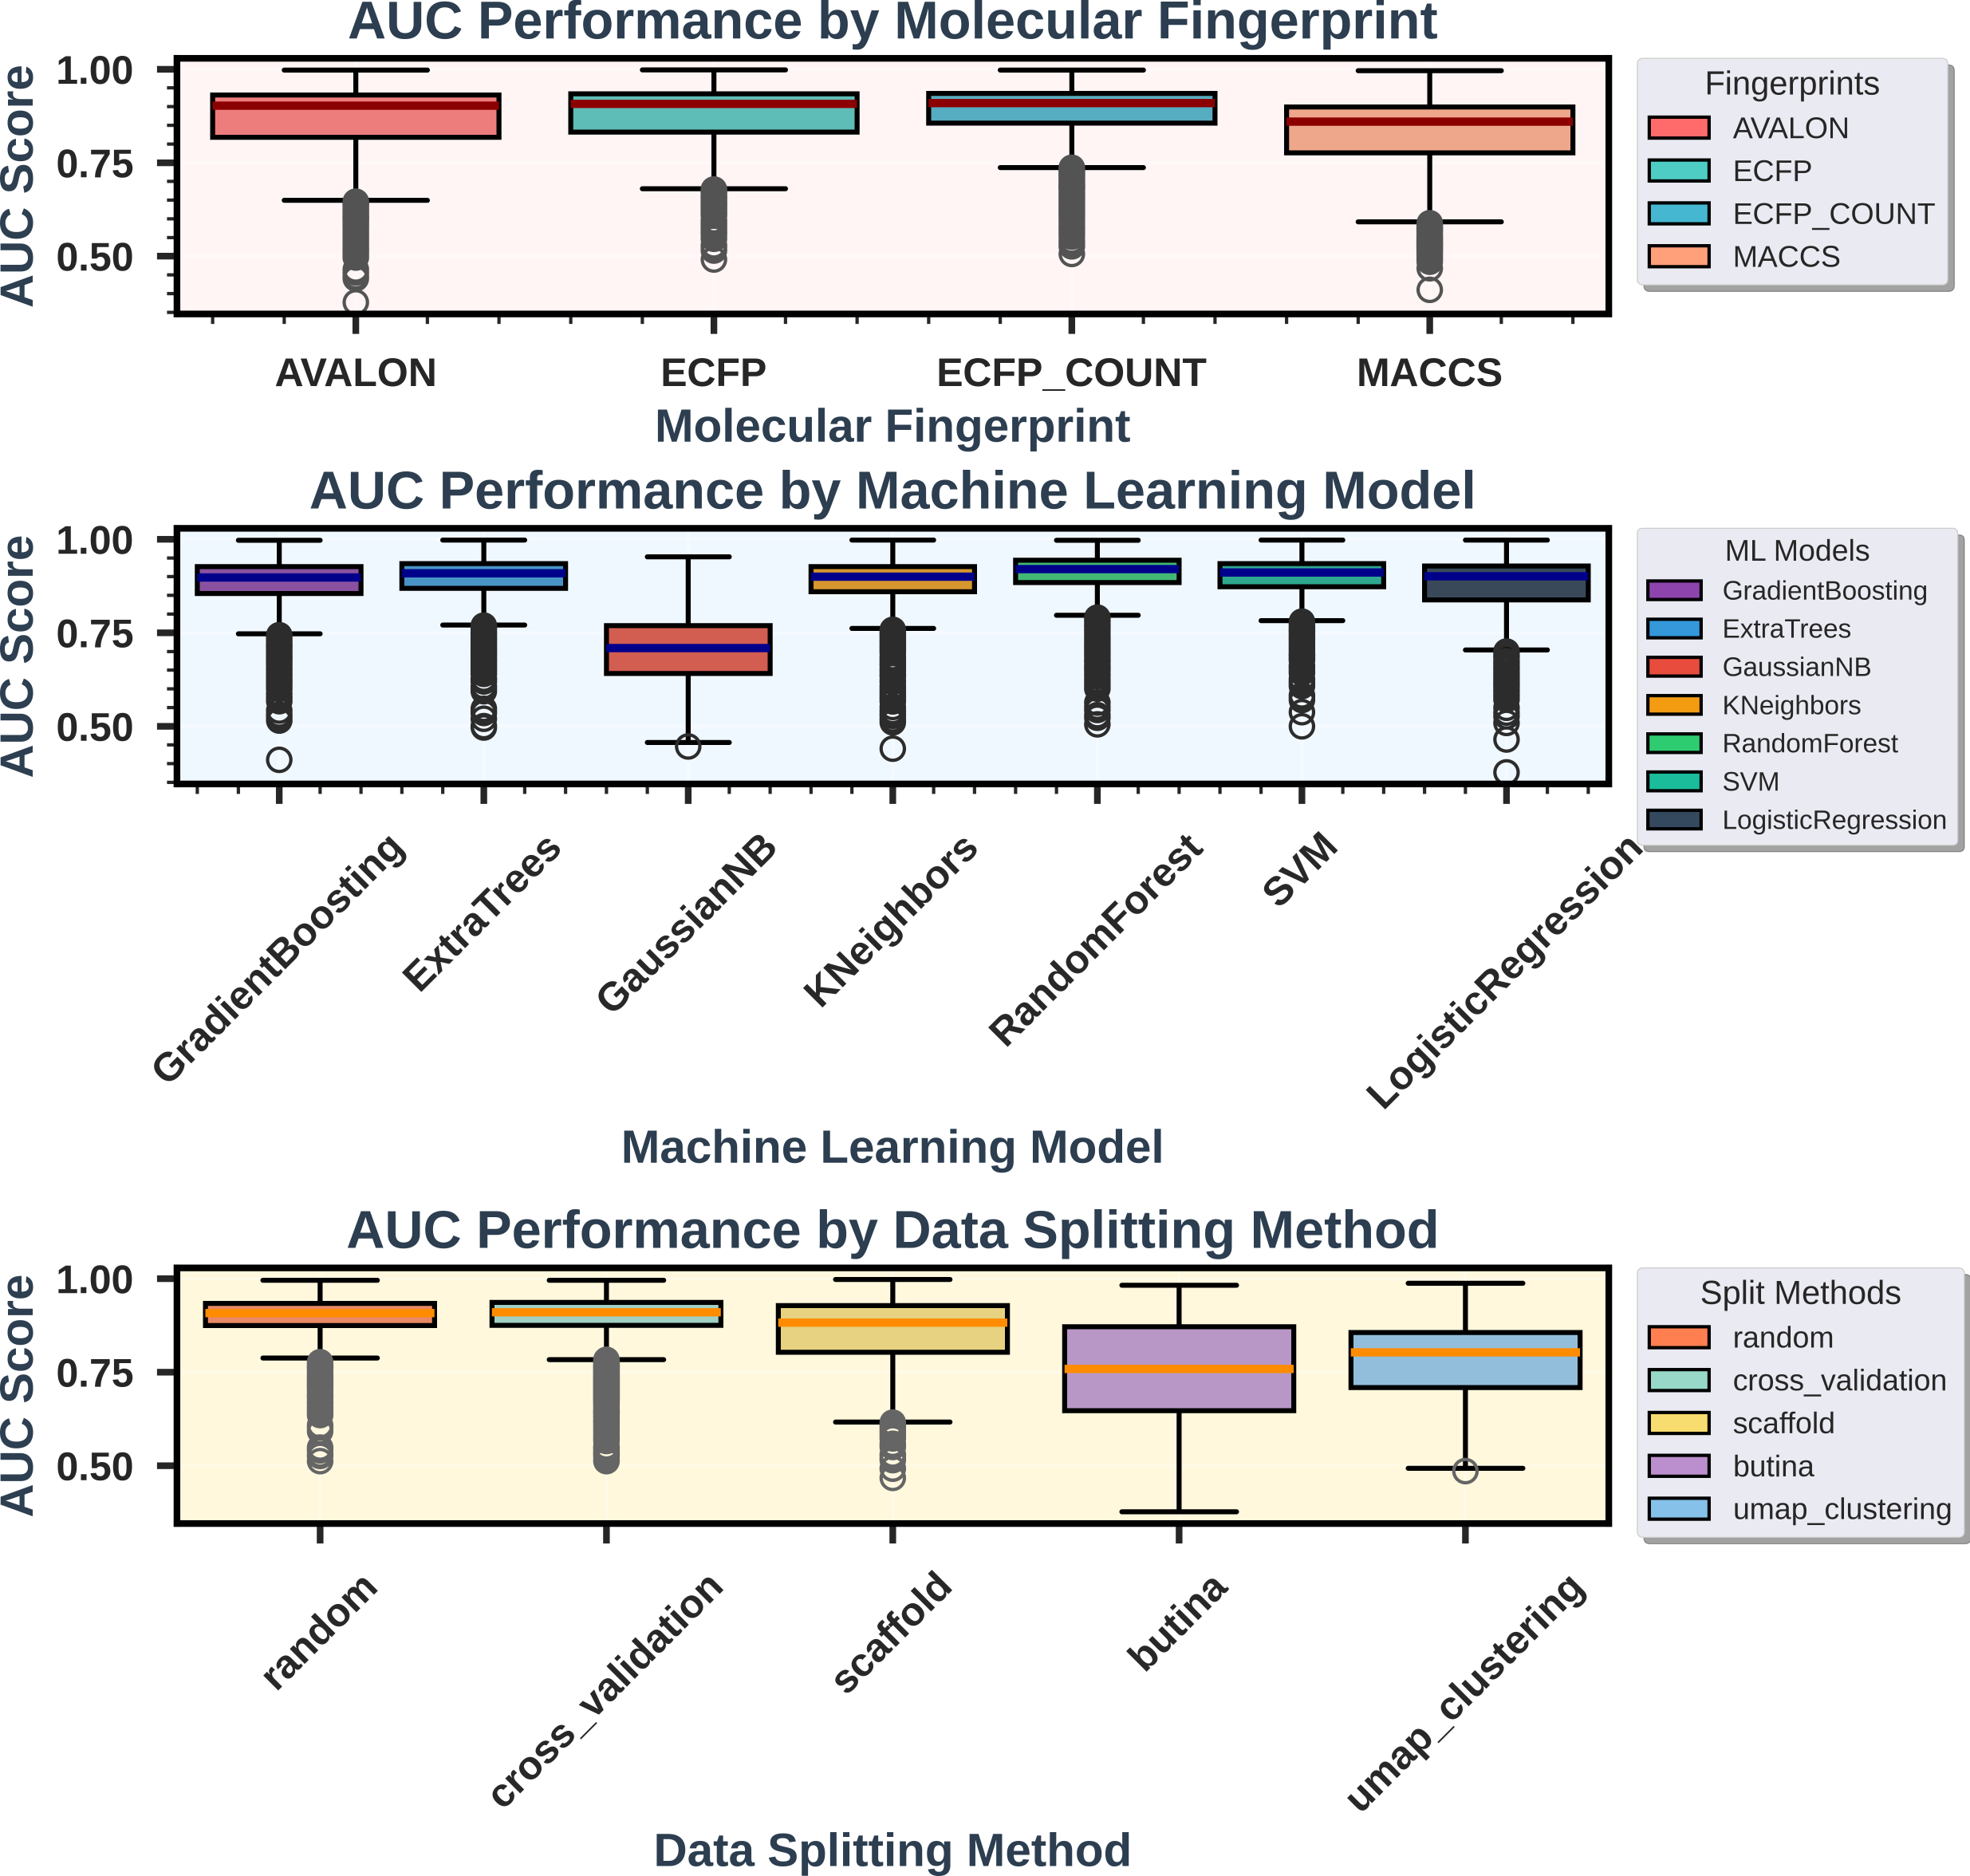


**Figure S7.** Comparative analysis of AUC performance across different experimental categories. Boxplots show AUC score distributions for molecular fingerprints (top), machine learning models (middle), and data splitting methods (bottom). Each boxplots displaying median values, interquartile ranges, and outliers. Performance metrics were aggregated across all kinase targets and experimental conditions within each category.


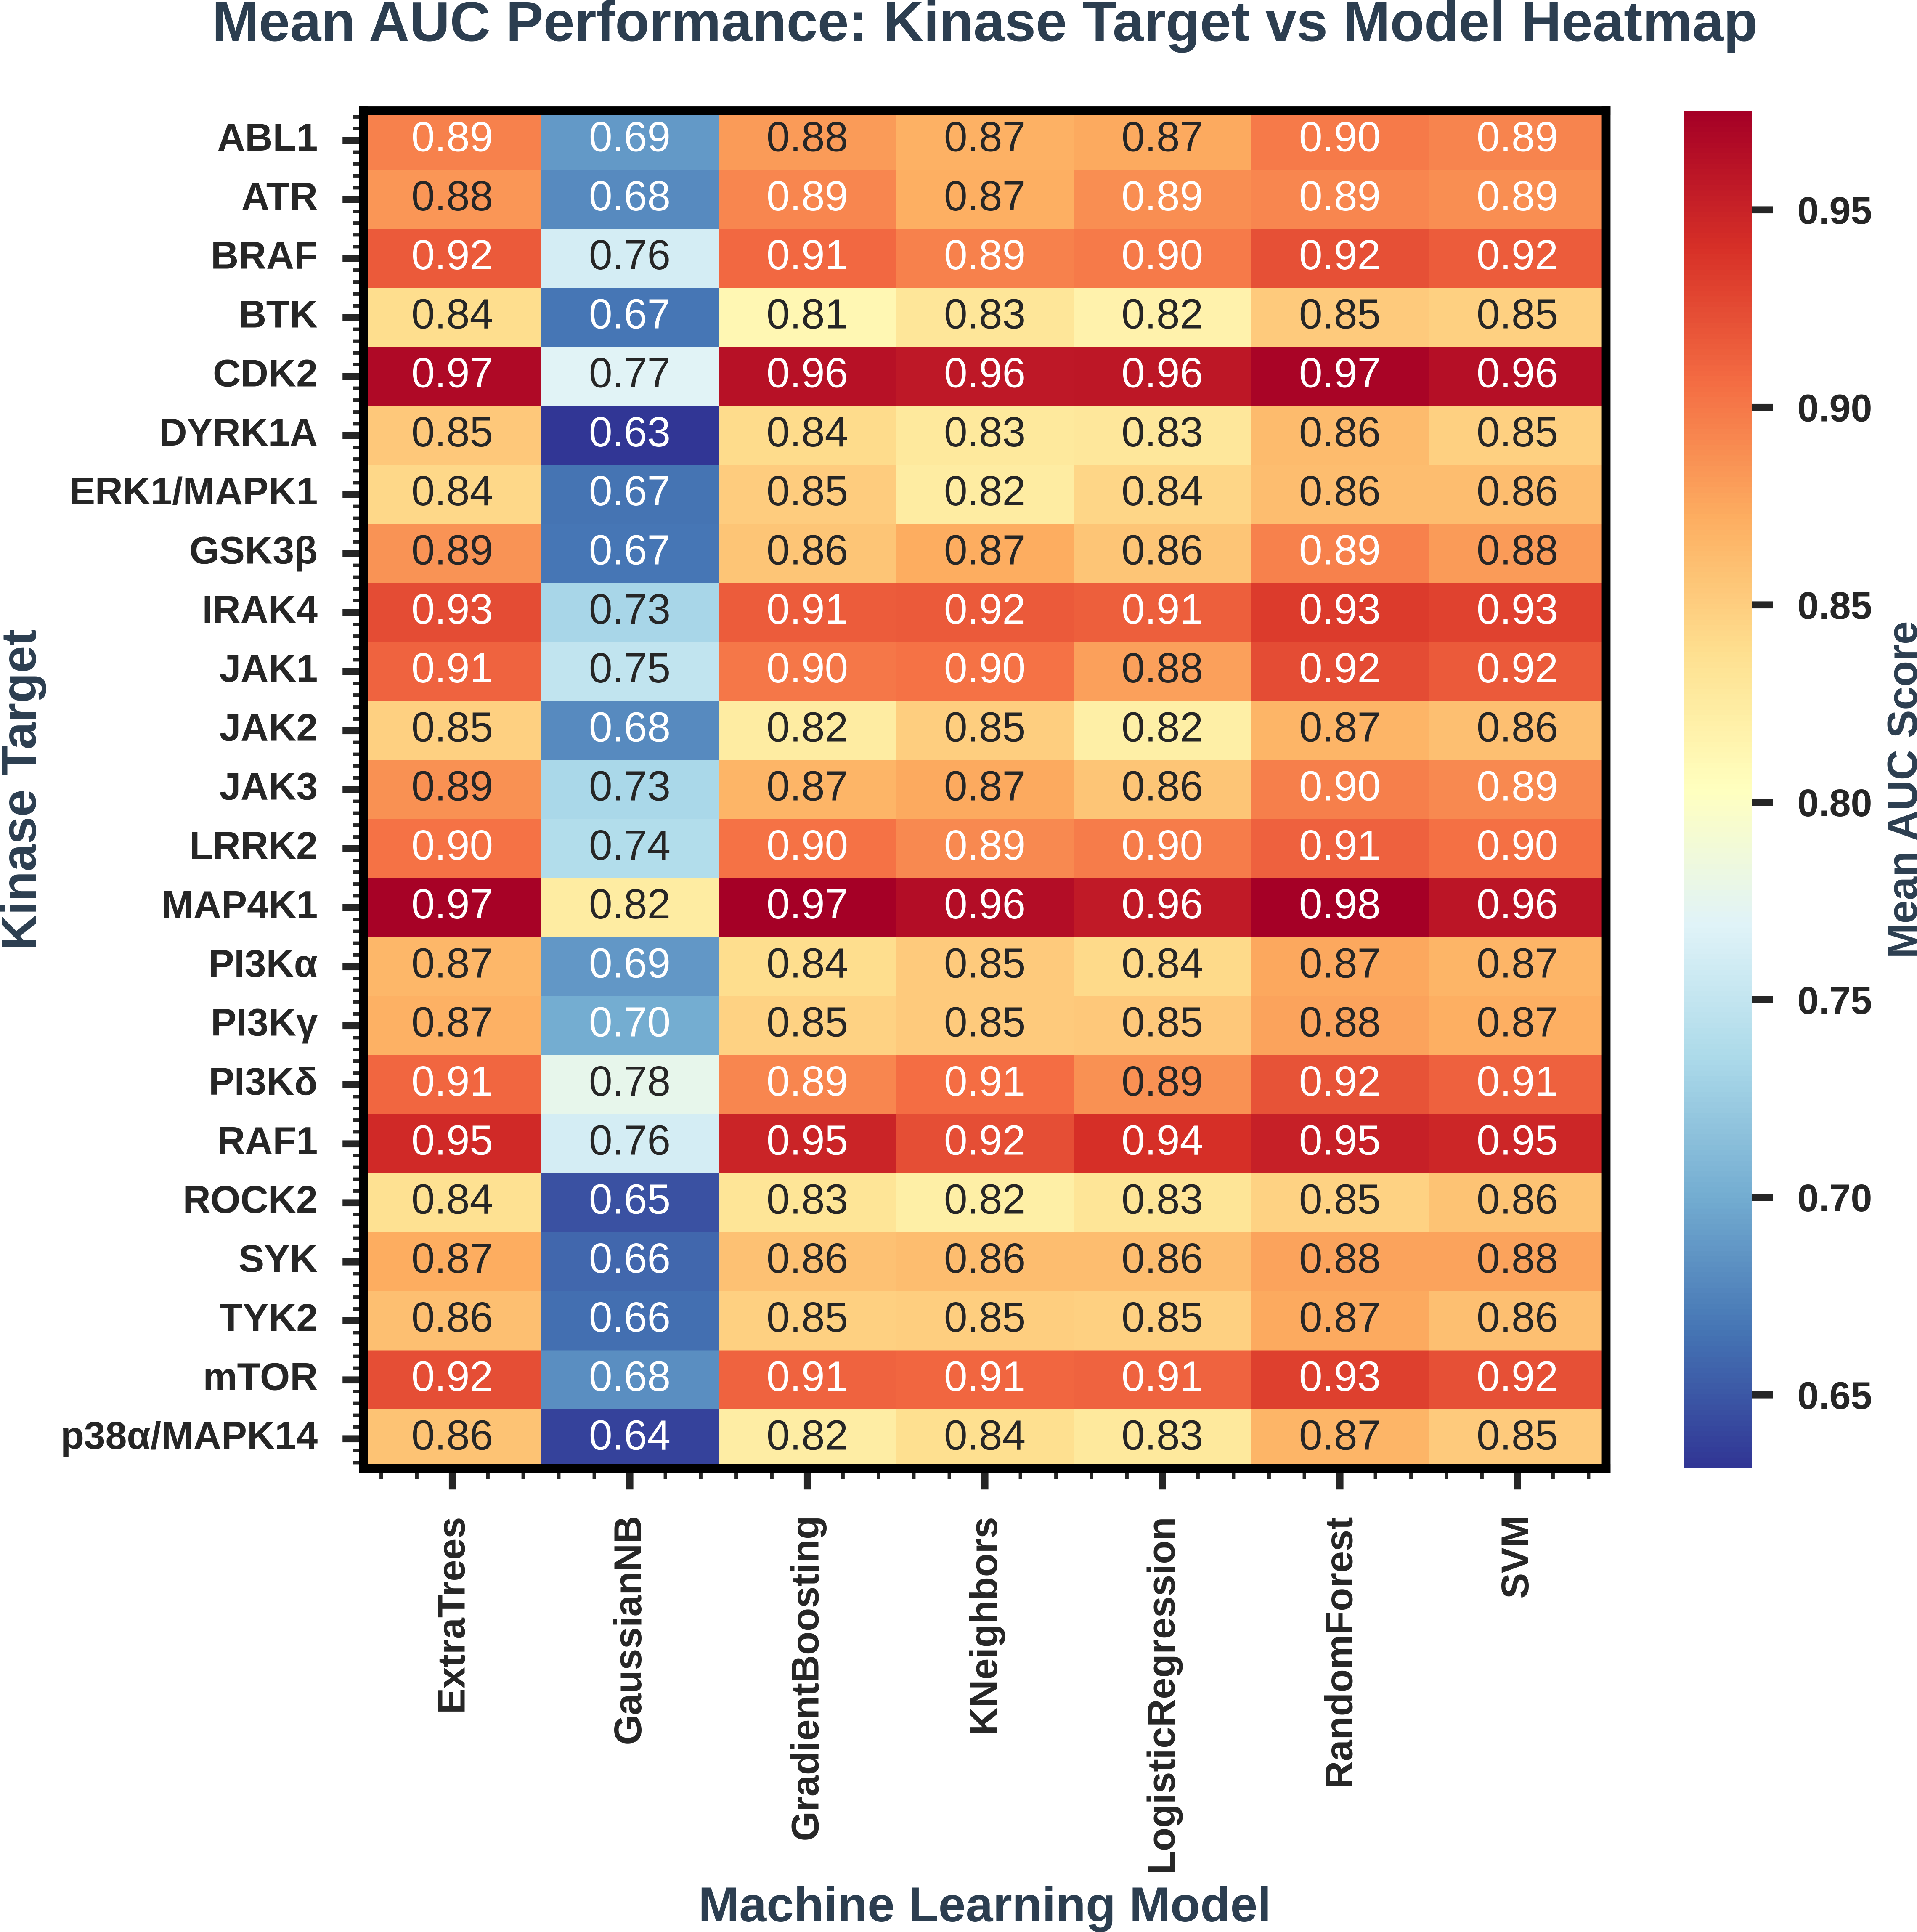


**Figure S8.** Kinase Target-Model performance heatmap. Heatmap showing mean AUC scores for each kinase target across different ML models, with annotated values for performance assessment.


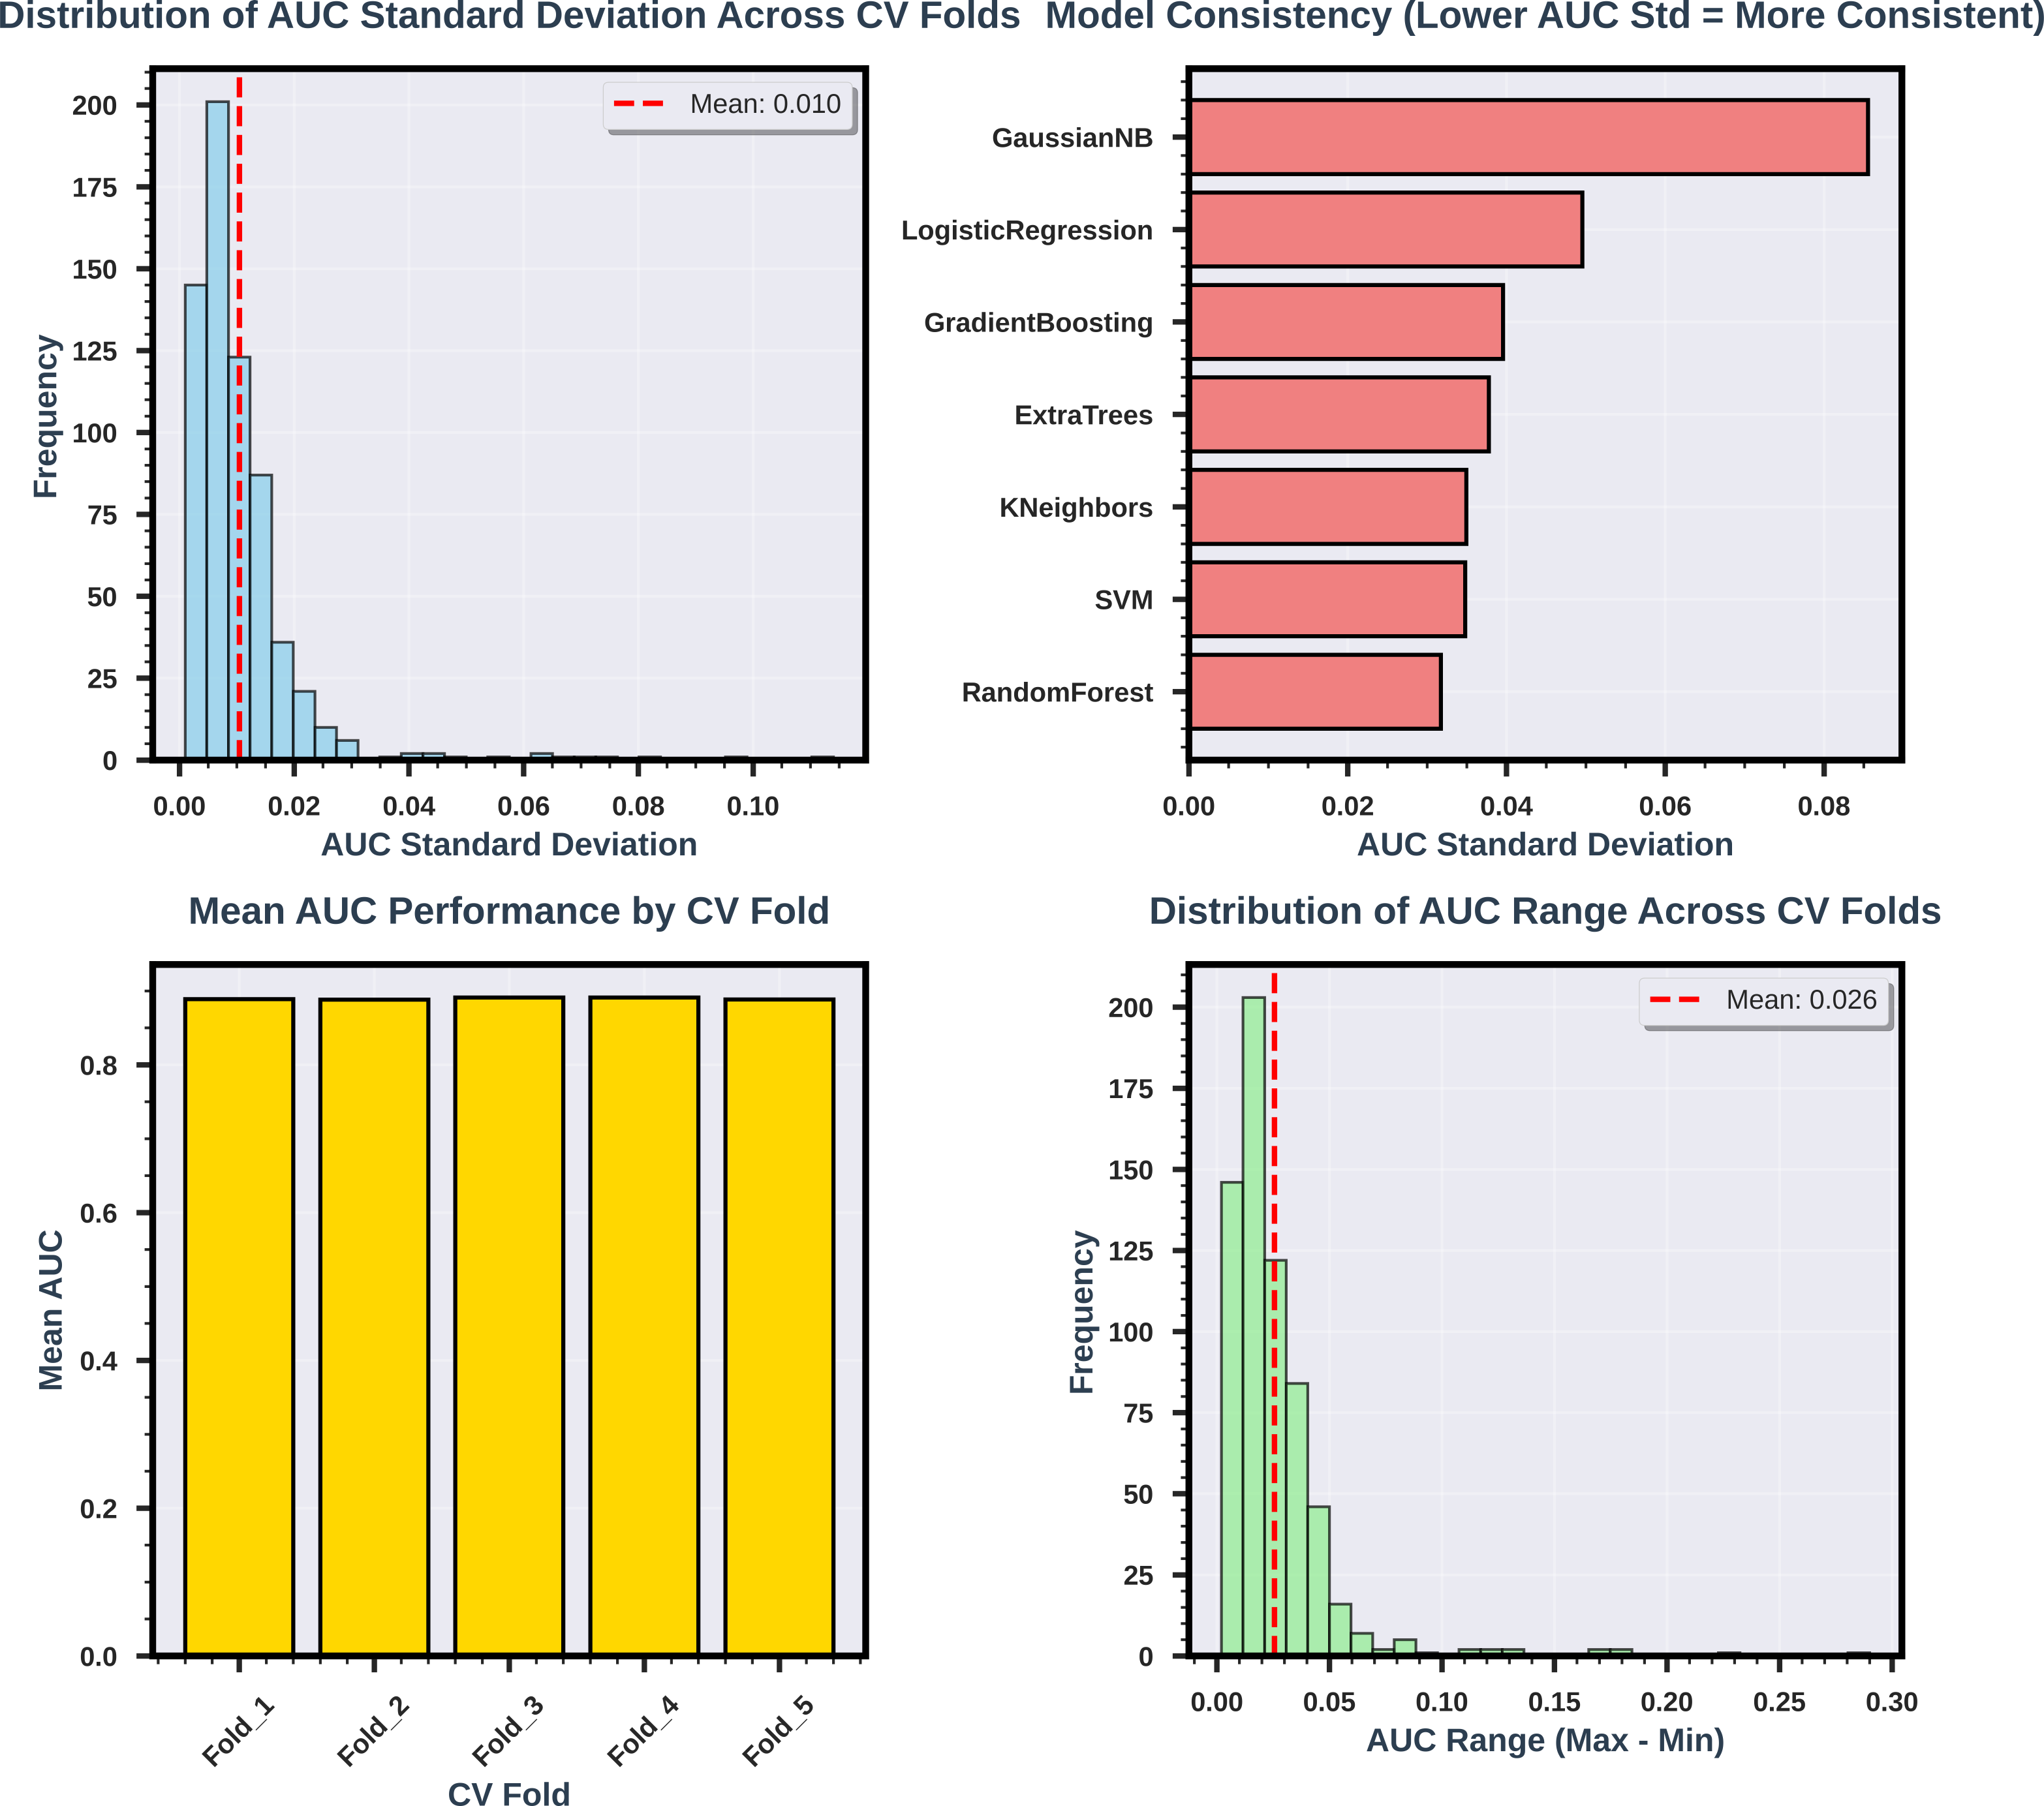


**Figure S9.** Cross-Validation Fold consistency analysis: Model Stability Assessment

**Table S2.** Top 10 Performing Model-Fingerprint-Split Combinations (Multi-Kinase).

| Fingerprint | Model | Split_Method | AUC_mean | AUC_std | CV_AUC_mean | CV_AUC_std | AUC_CV_ratio | CV_stability | Composite_score |
| --- | --- | --- | --- | --- | --- | --- | --- | --- | --- |
| AVALON | RandomForest | random | 0.574 | 0.075 | 0.580 | 0.078 | 0.131 | 0.134 | 0.432 |
| AVALON | RandomForest | umap_cluster | 0.574 | 0.075 | 0.581 | 0.078 | 0.131 | 0.134 | 0.432 |
| MACCS | RandomForest | scaffold | 0.569 | 0.074 | 0.568 | 0.074 | 0.130 | 0.130 | 0.431 |
| AVALON | RandomForest | scaffold | 0.576 | 0.077 | 0.578 | 0.079 | 0.133 | 0.137 | 0.431 |
| MACCS | RandomForest | umap_cluster | 0.568 | 0.075 | 0.564 | 0.072 | 0.132 | 0.128 | 0.430 |
| ECFP | RandomForest | random | 0.568 | 0.072 | 0.578 | 0.078 | 0.126 | 0.135 | 0.430 |
| AVALON | RandomForest | butina | 0.576 | 0.077 | 0.574 | 0.080 | 0.133 | 0.139 | 0.429 |
| MACCS | RandomForest | random | 0.568 | 0.075 | 0.567 | 0.073 | 0.132 | 0.129 | 0.429 |
| ECFP | RandomForest | umap_cluster | 0.566 | 0.074 | 0.577 | 0.075 | 0.131 | 0.130 | 0.428 |
| MACCS | RandomForest | butina | 0.568 | 0.075 | 0.560 | 0.075 | 0.132 | 0.134 | 0.427 |

Composite_score = AUC_mean * (1-AUC_CV_ratio) * (1- CV_stability)

We developed a composite scoring system that incorporates multiple performance dimensions: Models, Features, and Split Type. The score combines three key metrics: AUC_mean (primary performance indicator), AUC_CV_ratio (AUC_std / AUC_mean, measuring stability across targets), and CV_stability (CV_AUC_std / CV_AUC_mean, measuring consistency across cross-validation folds). The score rewards high-performing models by multiplying these terms, ensuring selection of models that are both accurate and robust across targets and data splits, rather than simply selecting the highest AUC, which may be unstable.


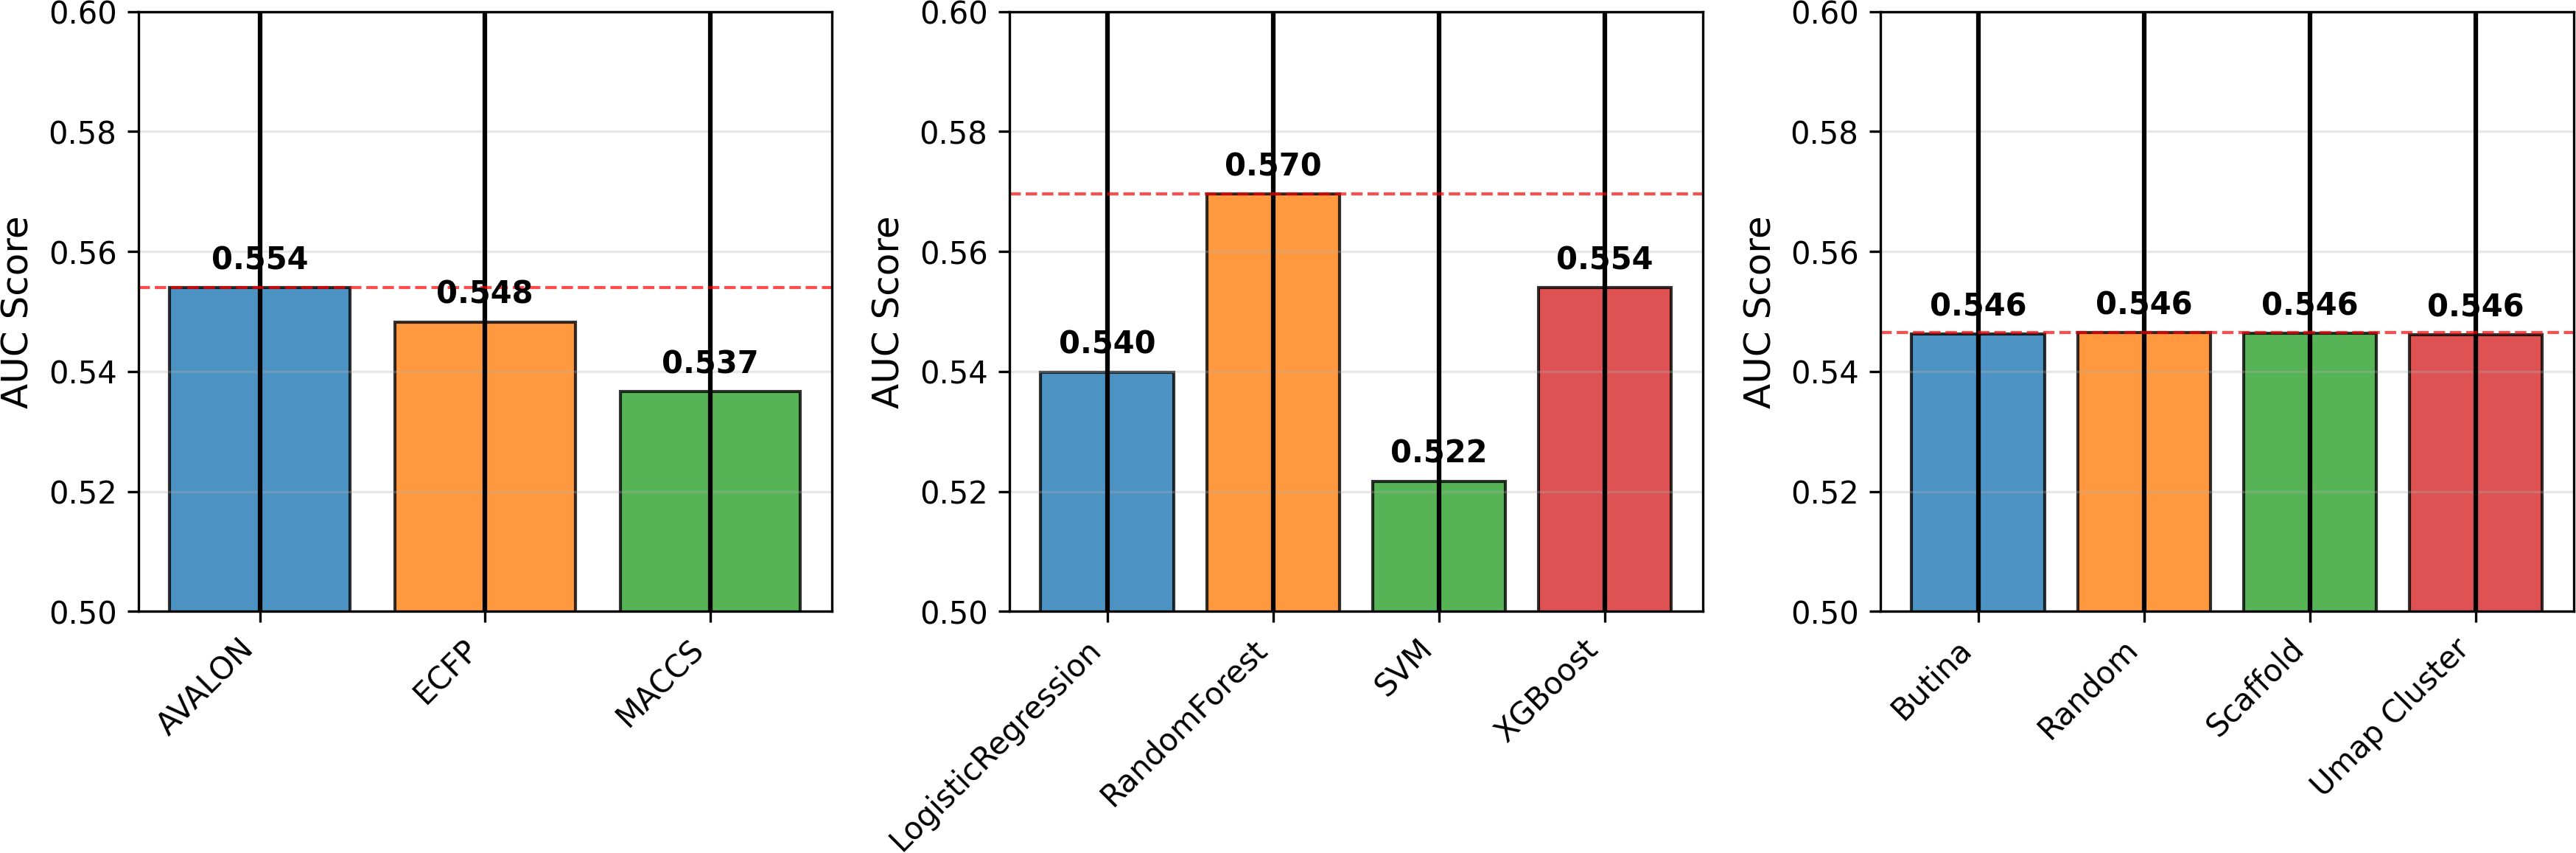
 **Figure S10.** Multitask Classification performance comparison across Phenotype Model components. (Left) Molecular fingerprint representations evaluated for multitask classification. AVALON (0.554 AUC) and ECFP (0.548 AUC) perform comparably, while MACCS (0.537 AUC) shows lower performance. (Middle) Machine learning algorithms benchmarked for multitask learning. Random Forest achieves the highest AUC score (0.570), followed by XGBoost (0.554), Logistic Regression (0.540), and SVM (0.522). The red dashed line indicates the best-performing configuration. (Right) Data splitting strategies evaluated for robustness. Butina, Random, Scaffold, and UMAP Cluster splitting methods demonstrate comparable performance (all 0.546 AUC), suggesting data partitioning strategy has minimal impact on model performance. All measurements represent average AUC scores across the multitask classification benchmarks.


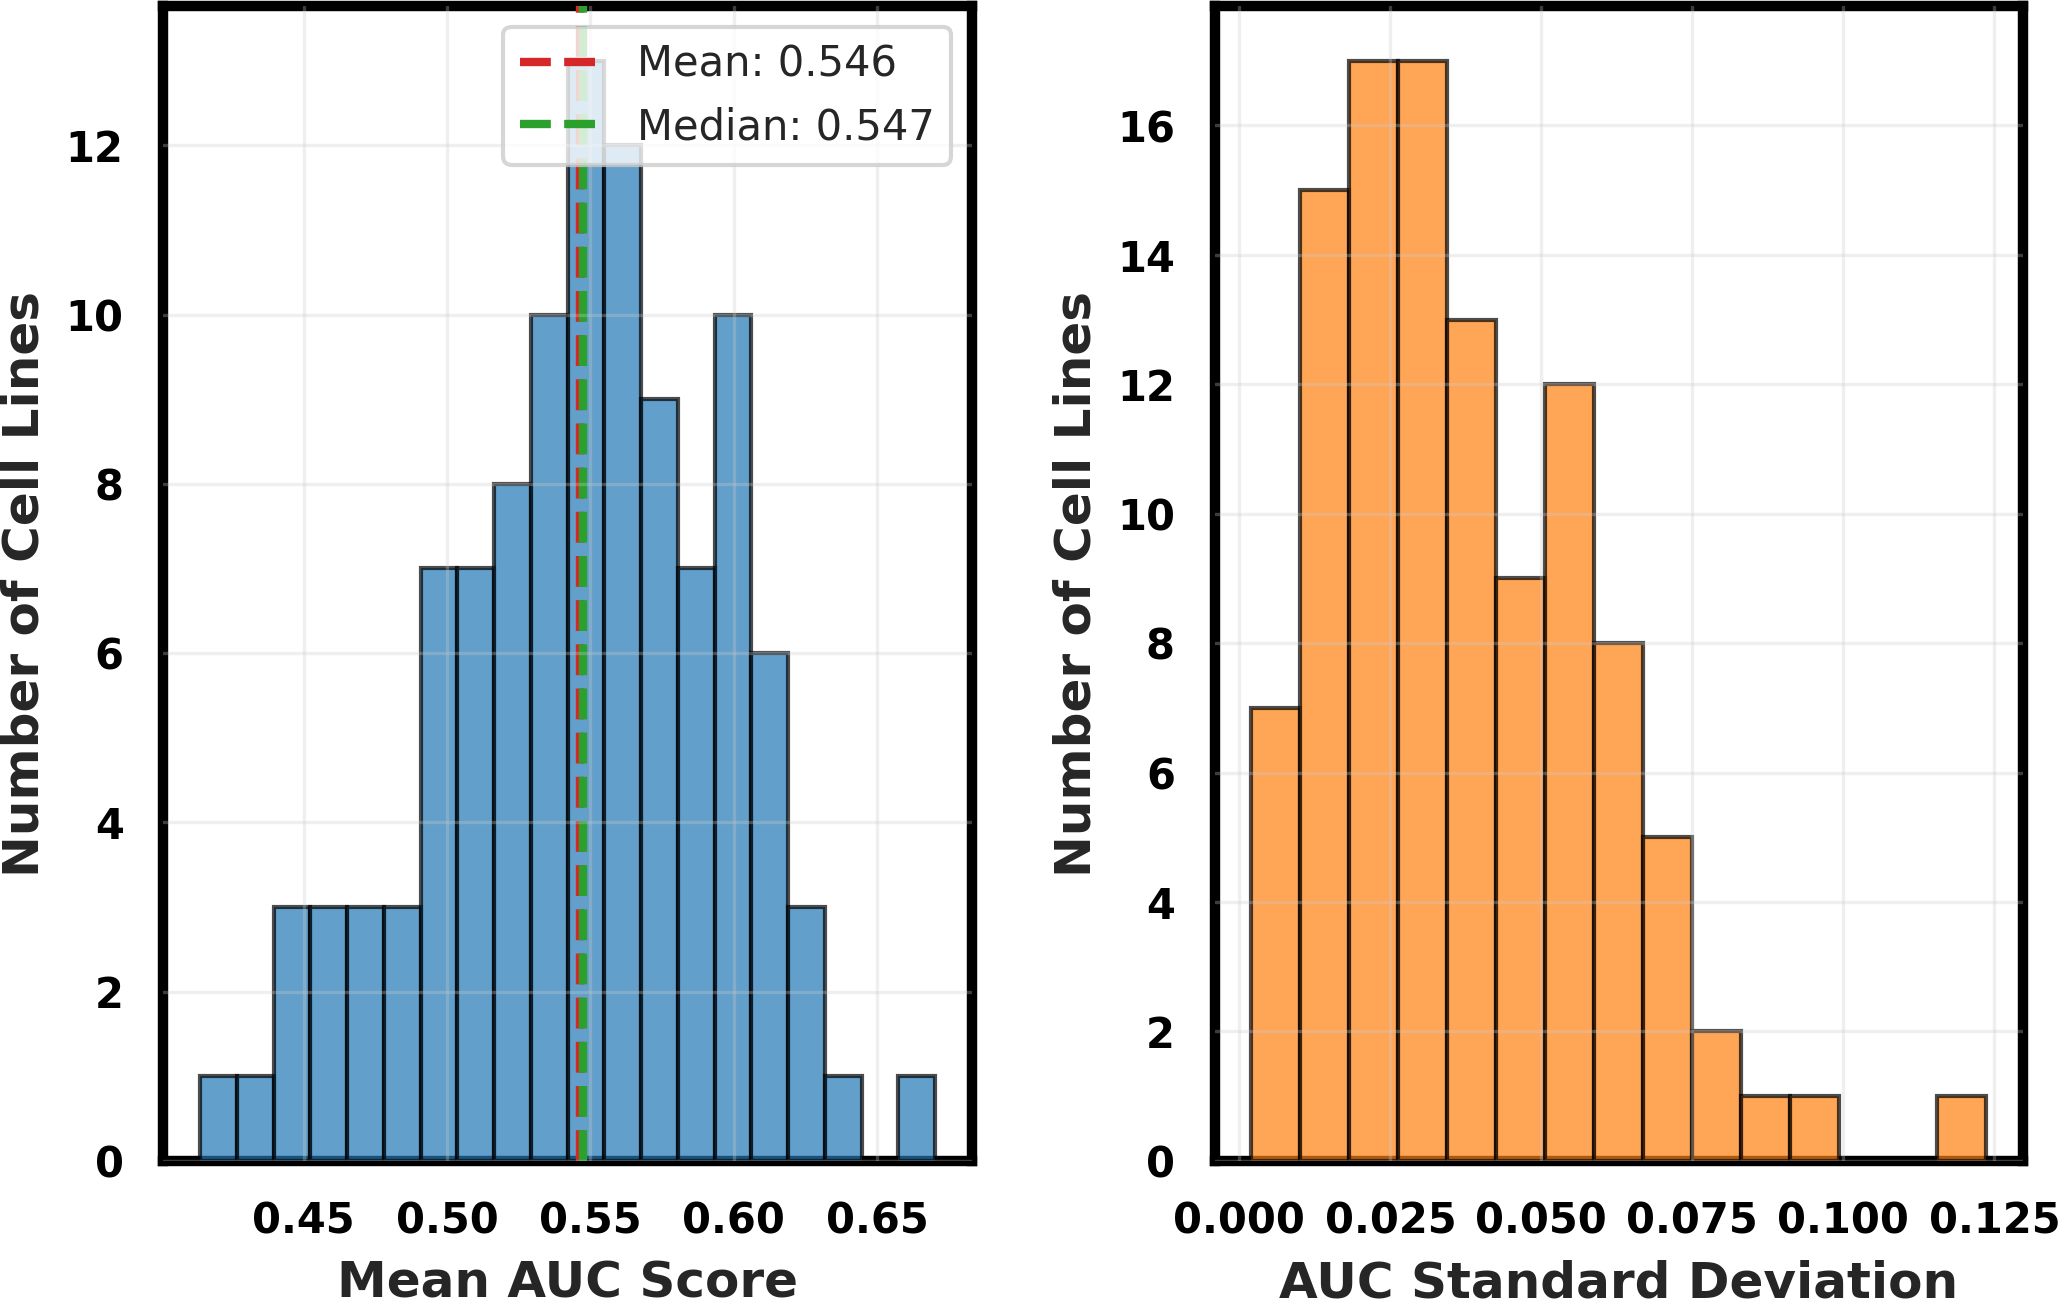


**Figure S11.** Phenotype model performance variability analysis.

(Left) Distribution of mean AUC scores across NSCLC cell lines. The histogram displays a near-normal distribution with mean AUC of 0.546 and median of 0.547, indicating consistent overall model performance. Most cell lines cluster between 0.50-0.60 AUC range. (Right) Performance variability across molecular fingerprints for individual cell lines. The distribution of AUC standard deviations shows right-skewed behavior, with the majority of cell lines exhibiting low variability (<0.05 AUC standard deviation), suggesting that fingerprint choice has minimal impact on predictions. A small subset of cell lines demonstrates higher variability (0.08-0.12 AUC standard deviation), indicating context-dependent fingerprint sensitivity.


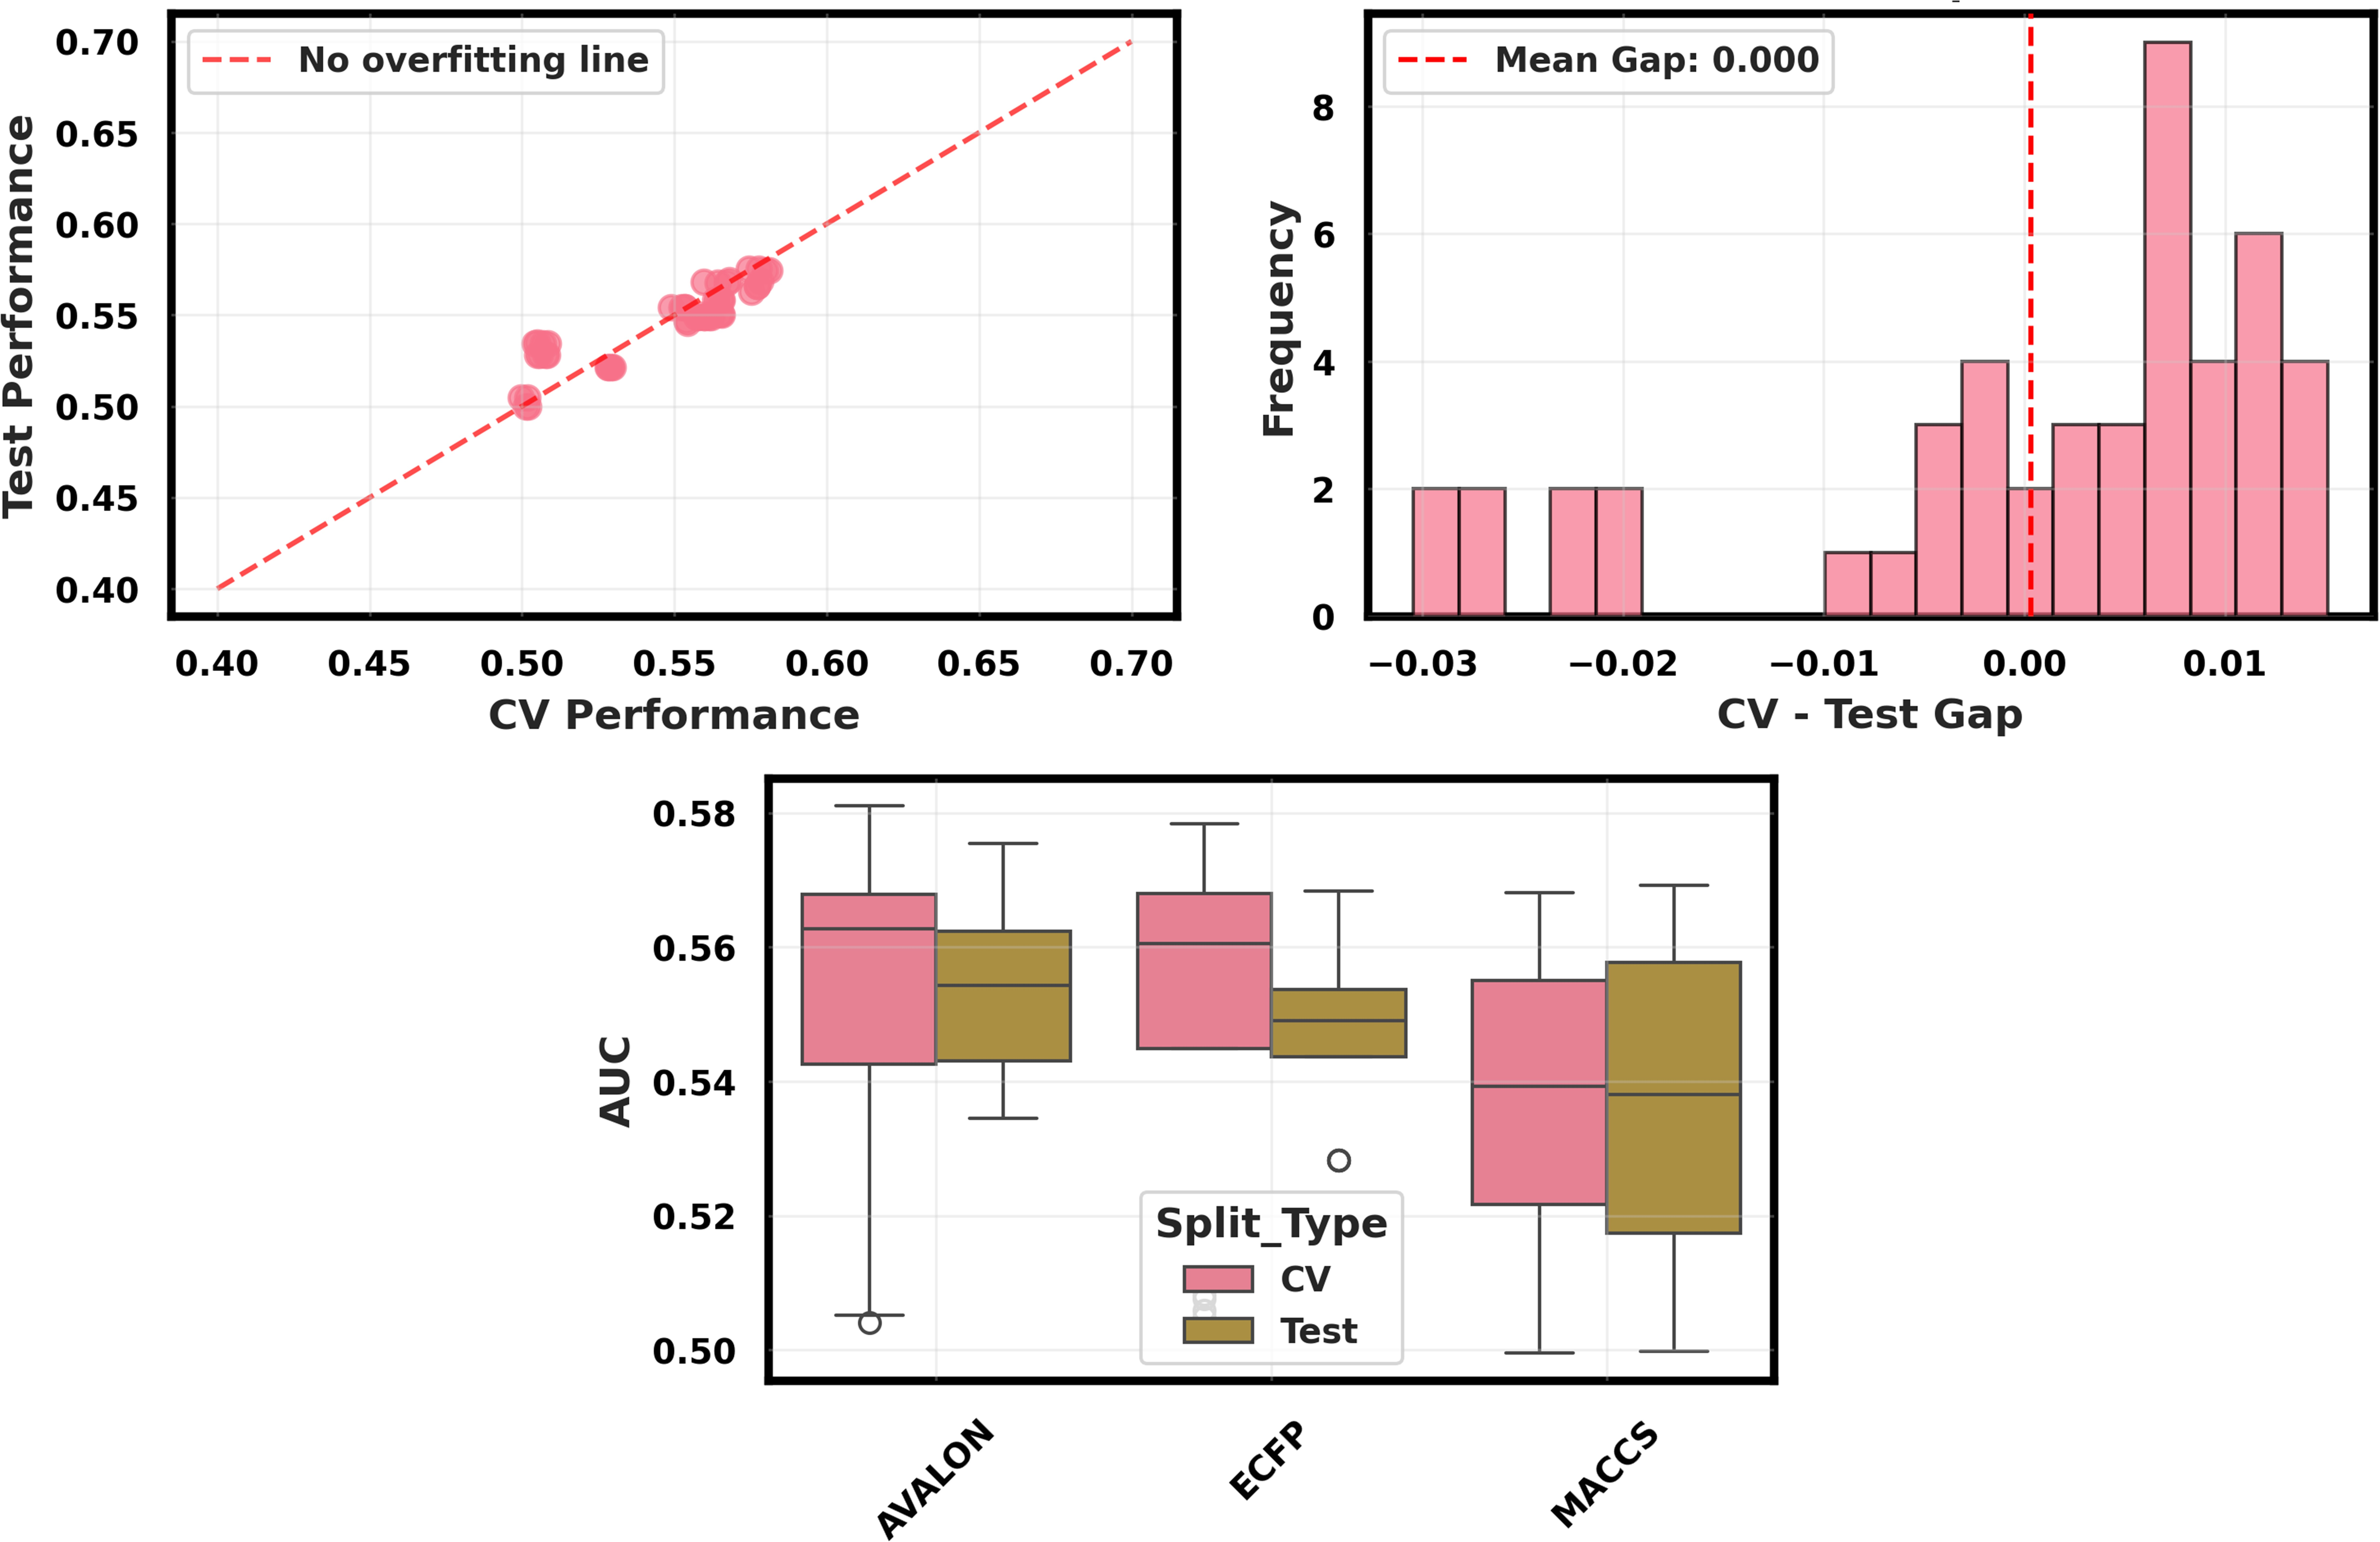


**Figure S12.** Phenotype Model generalization and validation performance analysis.

(Top Left) 5-Fold cross-validation vs test set performance scatter plot. Points aligned near the "no overfitting line" demonstrate strong correlation between cross-validation and test performance (mean gap: 0.000), indicating robust generalization without systematic overfitting.

(Top Right) Generalization gap distribution across all configurations. The histogram shows gaps centered at 0.000 with minimal spread, confirming that cross-validation performance reliably predicts test set performance. No significant bias toward positive or negative gaps observed.

(Bottom) Performance by molecular fingerprint comparing cross-validation (pink) and test set (olive) AUC scores across AVALON, ECFP, and MACCS representations. AVALON and ECFP fingerprints demonstrate superior and consistent performance (~0.56 AUC) compared to MACCS (~0.54 AUC), with minimal generalization gaps.





**Figure S13.** Phenotype Model performance metrics distributions across NSCLC cell lines.

Histograms displaying five classification performance metrics (AUC: 0.546, F1: 0.294, Precision: 0.368, Recall: 0.287, Accuracy: 0.640) across 108 cell lines. The notably low recall reflects data scarcity in multi-task learning (439 drugs × 108 cell lines), resulting in limited training samples per cell line and reduced ability to predict positive phenotypic responses. AUC and Accuracy provide more stable performance estimates under these data-constrained conditions.

**Table S3.** Top 10 Performing Model-Fingerprint-Split Combinations (Phenotype models).

| Fingerprint | Model | Split_Method | AUC_mean | AUC_std | CV_AUC_mean | CV_AUC_std | AUC_CV_ratio | CV_stability | Composite_score |
| --- | --- | --- | --- | --- | --- | --- | --- | --- | --- |
| AVALON | RandomForest | random | 0.574 | 0.075 | 0.580 | 0.078 | 0.131 | 0.134 | 0.432 |
| AVALON | RandomForest | umap_cluster | 0.574 | 0.075 | 0.581 | 0.078 | 0.131 | 0.134 | 0.432 |
| MACCS | RandomForest | scaffold | 0.569 | 0.074 | 0.568 | 0.074 | 0.130 | 0.130 | 0.431 |
| AVALON | RandomForest | scaffold | 0.576 | 0.077 | 0.578 | 0.079 | 0.133 | 0.137 | 0.431 |
| MACCS | RandomForest | umap_cluster | 0.568 | 0.075 | 0.564 | 0.072 | 0.132 | 0.128 | 0.430 |
| ECFP | RandomForest | random | 0.568 | 0.072 | 0.578 | 0.078 | 0.126 | 0.135 | 0.430 |
| AVALON | RandomForest | butina | 0.576 | 0.077 | 0.574 | 0.080 | 0.133 | 0.139 | 0.429 |
| MACCS | RandomForest | random | 0.568 | 0.075 | 0.567 | 0.073 | 0.132 | 0.129 | 0.429 |
| ECFP | RandomForest | umap_cluster | 0.566 | 0.074 | 0.577 | 0.075 | 0.131 | 0.130 | 0.428 |
| MACCS | RandomForest | butina | 0.568 | 0.075 | 0.560 | 0.075 | 0.132 | 0.134 | 0.427 |

Composite_score = AUC_mean * (1-AUC_CV_ratio) * (1- CV_stability)


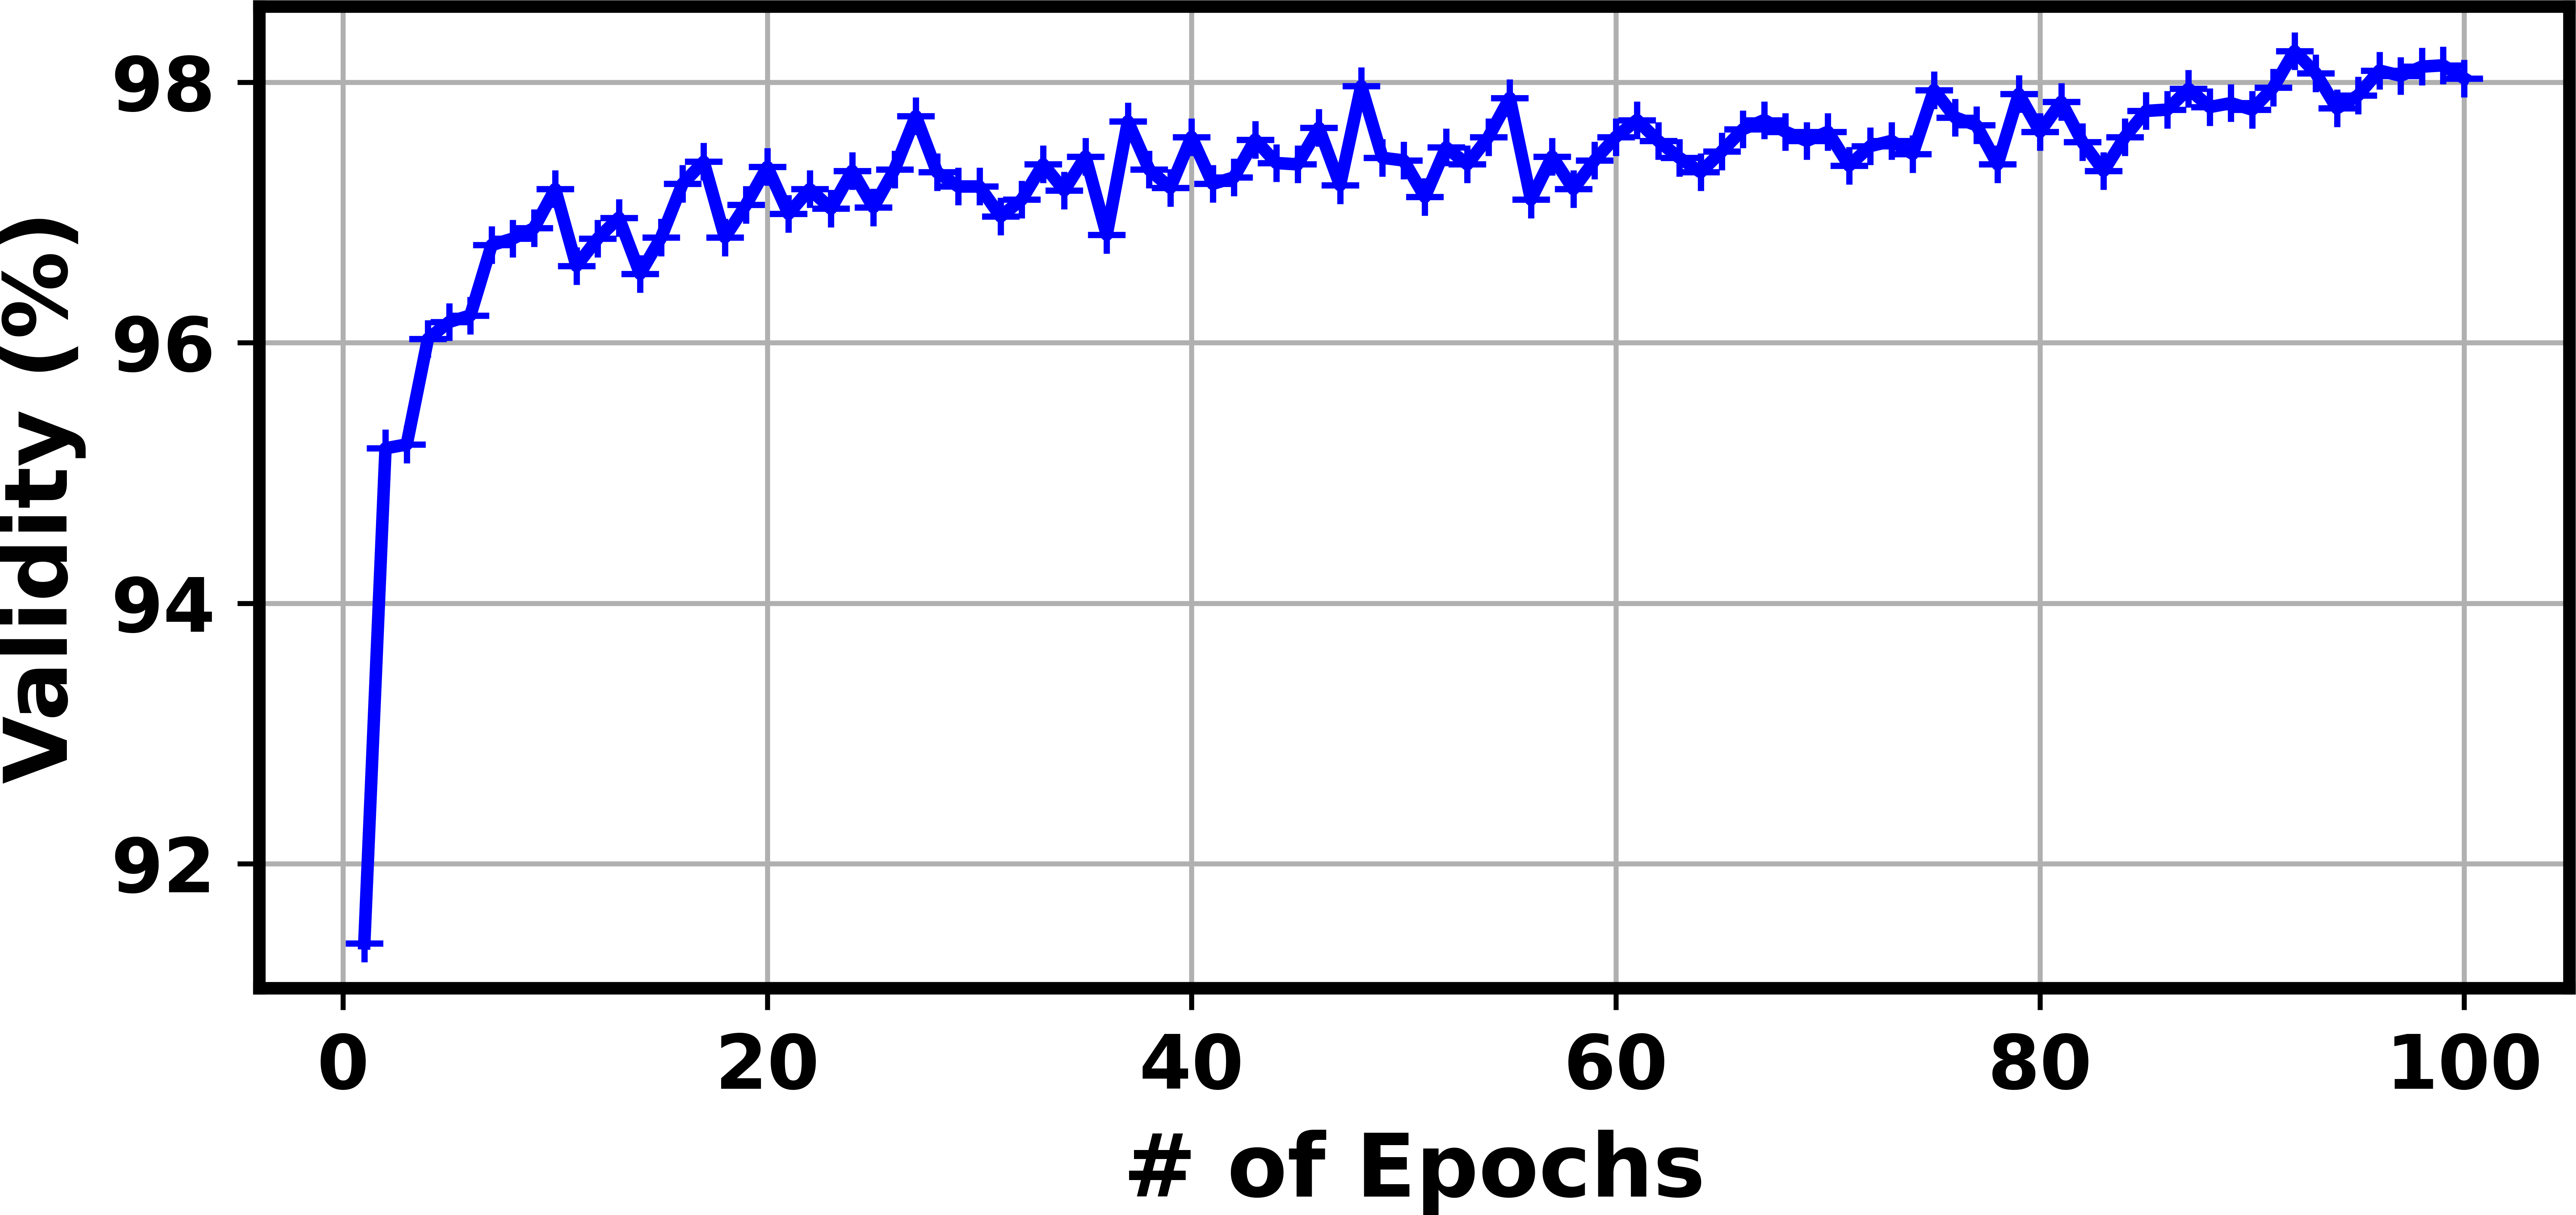


**Figure S14.** This plot illustrates the percentage of valid SMILES generated by the model over 100 training epochs. The validity percentage, indicating the model's accuracy, initially increases sharply and stabilizes around 96% after approximately 20 epochs. The trend showcases a plateau and reaching up to 98%, suggesting that the model achieves consistent performance beyond the early phase of training.


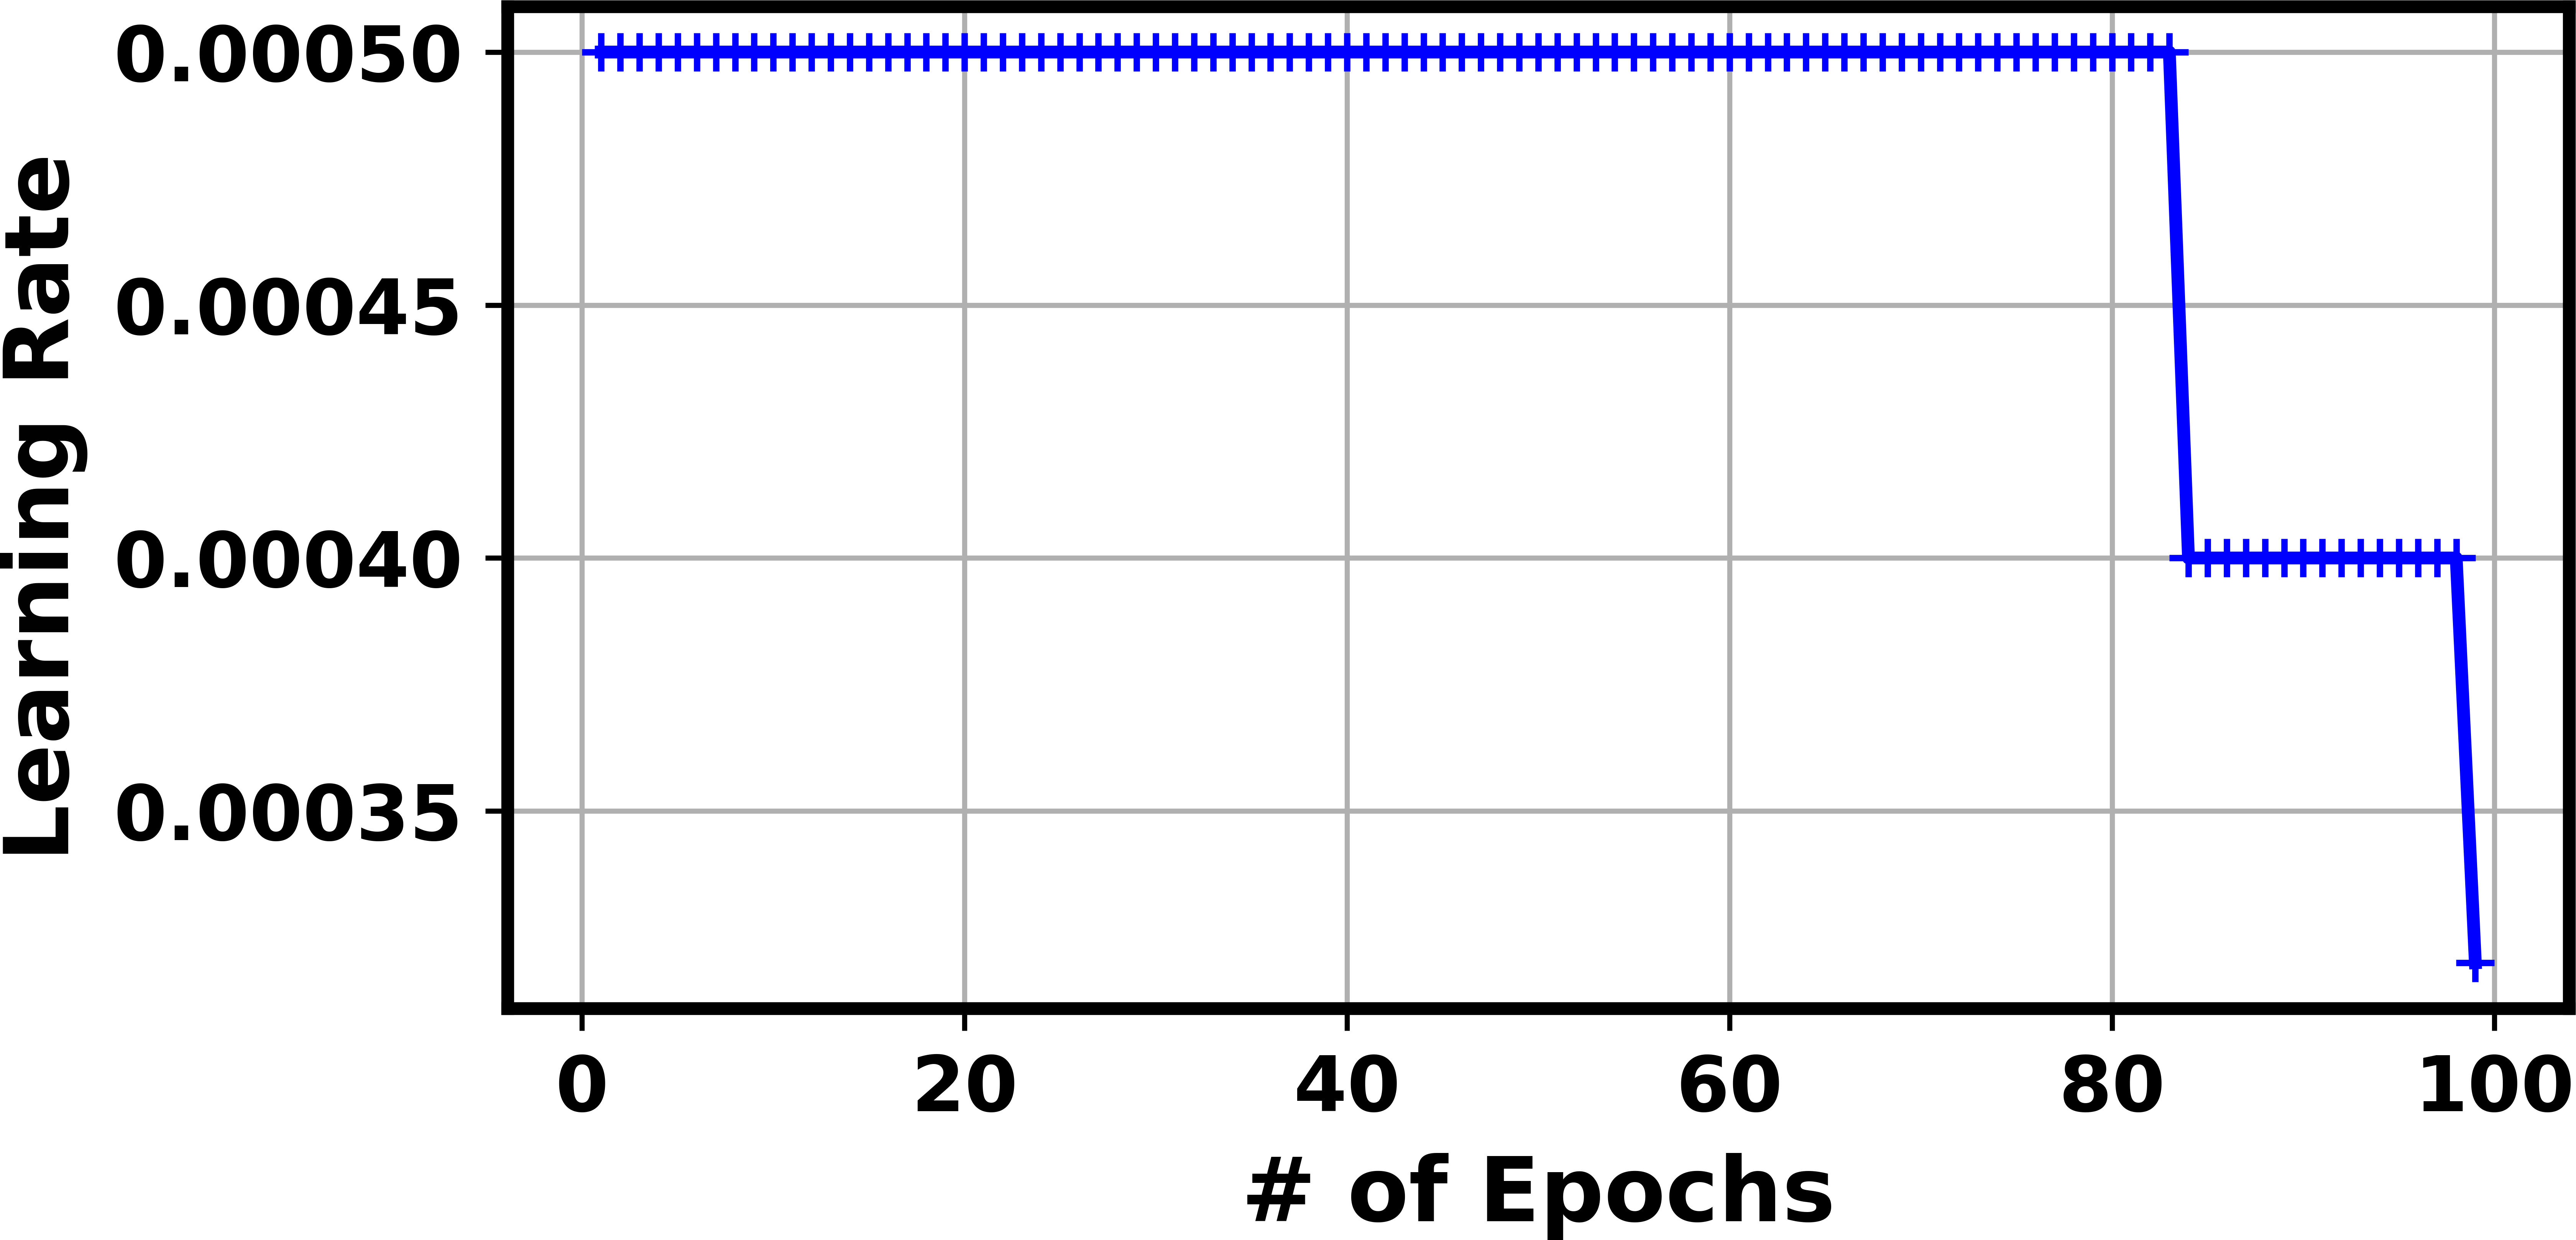


**Figure S15.** This plot presents the model's learning rate across 100 training epochs, represented as a percentage change in validity. The learning rate remains consistent during the early and middle phases of training, indicated by the flat line at the top of the graph. A sudden decrease in validity percentage is observed near the 80th epoch, followed by a brief stabilization and another drop at the end of the training process. The error bars suggest minimal fluctuation during the epochs where changes occur.

**Table S4.** Comparison of different jobs and their parameters settings used for de novo molecule generation via reinforcement learning under single-Objective campaign.

| JOBS | Diversity Filter | Inception* | Reinforcement Learning Parameters | Scoring Functions | | | | | |
| --- | --- | --- | --- | --- | --- | --- | --- | --- | --- |
| **RET-MUT Regression Parameters** | **QED** | **HBA** | **HBD** | **SlogP** | **Docking** |
| Job01 | Minscore: 0.4  Minsimilarity: 0.4 | 70 molecules | Batch Size: 128  Learning rate: 0.0001  Margin_threshold: 50  N_steps: 3000  Sigma: 128 | Transformation: sigmoid  High: 10  Low: 5  K: 0.25  Weight: 5 | Weight: 1 | - | - | - | - |
| Job02 | 249 molecules | Transformation: sigmoid  High: 10  Low: 5  K: 0.25  Weight: 5 | - | Transformation: step  High: 11  Low: 6  Weight: 1 | Transformation: step  High: 3  Low: 0  Weight: 1 | Transformation: step  High: 6.3  Low: 2.5  Weight: 1 | - |
| Job03 | 249 molecules | Transformation: sigmoid  High: 9  Low: 4  K: 0.25  Weight: 3 | - | Transformation: step  High: 12  Low: 8  Weight: 1 | Transformation: step  High: 3  Low: 1  Weight: 1 | Transformation: step  High: 5.6  Low: 3.5  Weight: 1 | - |
| Job04_Run01 | 70 molecules | Transformation: sigmoid  High: 10  Low: 5  K: 0.25  Weight: 5 | Weight: 1 | - | - | - | - |
| Job04_Run02 | 249 molecules | Transformation: sigmoid  High: 9  Low: 4  K: 0.25  Weight: 3 | - | Transformation: step  High: 11  Low: 6  Weight: 1 | Transformation: step  High: 3  Low: 0  Weight: 1 | Transformation: step  High: 6.3  Low: 2.5  Weight: 1 | - |
| Job04_Run03 | 249 molecules | Transformation: sigmoid  High: 9  Low: 4  K: 0.25  Weight: 3 | - | Transformation: step  High: 11  Low: 6  Weight: 1 | Transformation: step  High: 3  Low: 0  Weight: 1 | Transformation: step  High: 6.3  Low: 2.5  Weight: 1 | - |
| Job04_Run04 | 249 molecules | Transformation: sigmoid  High: 9  Low: 4  K: 0.25  Weight: 3 | - | Transformation: step  High: 11  Low: 6  Weight: 1 | Transformation: step  High: 3  Low: 0  Weight: 1 | Transformation: step  High: 6.3  Low: 2.5  Weight: 1 | - |
| Job04_Run05 | 80 molecules | Transformation: sigmoid  High: 9  Low: 4  K: 0.25  Weight: 5 | - | Transformation: step  High: 11  Low: 6  Weight: 1 | Transformation: step  High: 3  Low: 0  Weight: 1 | Transformation: step  High: 6.3  Low: 2.5  Weight: 1 | - |
| Job04_Run06 | 80 molecules | Transformation: sigmoid  High: 9  Low: 4  K: 0.25  Weight: 5 | - | Transformation: step  High: 11  Low: 6  Weight: 1 | Transformation: step  High: 3  Low: 0  Weight: 1 | Transformation: step  High: 6.3  Low: 2.5  Weight: 1 | - |
| Job04_Run07 | 80 molecules | Transformation: sigmoid  High: 9  Low: 4  K: 0.25  Weight: 5 | - | Transformation: step  High: 11  Low: 6  Weight: 1 | Transformation: step  High: 3  Low: 0  Weight: 1 | Transformation: step  High: 6.3  Low: 2.5  Weight: 1 | - |
| Job05_Run01 | - | Batch Size: 8  Learning rate: 0.0001  Margin_threshold: 50  N_steps: 3000  Sigma: 128 | - | Weight: 1 | - | Transformation: step  High: 3  Low: 0  Weight: 1 | Transformation: step  High: 6.3  Low: 2.5  Weight: 1 | Transformation: reverse_sigmoid  High: -8  Low: -14.0  K: 0.25  Weight: 1 |
| Job05_Run02 | 249 molecules | Transformation: sigmoid  High: 9  Low: 4  K: 0.25  Weight: 3 | - | Transformation: step  High: 12  Low: 8  Weight: 1 | Transformation: step  High: 3  Low: 1  Weight: 1 | Transformation: step  High: 5.6  Low: 3.5  Weight: 1 |
| Job05_Run03 | 80 molecules | Batch Size: 8  Learning rate: 0.0001  Margin_threshold: 50  N_steps: 5000  Sigma: 128 | - | - | Transformation: step  High: 12  Low: 8  Weight: 1 | Transformation: step  High: 3  Low: 0  Weight: 1 | Transformation: step  High: 5.6  Low: 3.5  Weight: 1 |
| Job05_Run04 | 249 molecules | - | - | Transformation: step  High: 12  Low: 4  Weight: 1 | Transformation: step  High: 5  Low: 0  Weight: 1 | Transformation: step  High: 5.6  Low: 3.5  Weight: 1 |
| Job05_Run05 | 249 molecules | Transformation: sigmoid  High: 9  Low: 4  K: 0.25  Weight: 3 | - | Transformation: step  High: 12  Low: 4  Weight: 1 | Transformation: step  High: 5  Low: 0  Weight: 1 | Transformation: step  High: 5.6  Low: 3.5  Weight: 1 |

*****The RET-targeting inhibitors utilized as inception compounds in this study were retrieved from BindingDB and ExCAPE-DB, consistent with those employed in the regression-based modeling phase. **QED:** Quantitative estimate of drug-likeness; **HBA:** Hydrogen Bond Acceptor; **HBD:** Hydrogen Bond Donor; **SLogP:** Calculated Partition Coefficient; **Docking:** DockStream Component from Reinvent

**Table S5.** Comparison of different jobs and their parameters settings used for de novo molecule generation via reinforcement learning under multi-objective campaign.

| JOBS | Diversity Filter | Inception* | Reinforcement Learning Parameters |  |  | | Scoring Functions | | | | | | |
| --- | --- | --- | --- | --- | --- | --- | --- | --- | --- | --- | --- | --- | --- |
| **RET-MUT Regression Parameters** | | **Multi-Kinase Classification Parameters** | | **Phenotype Classification Parameters** | **QED** | **HBA** | **HBD** | **SlogP** | **Docking** |
| Job01 | Minscore: 0.4  Minsimilarity: 0.4 | 70 molecules | Batch Size: 128  Learning rate: 0.0001  Margin_threshold: 50  N_steps: 3000  Sigma: 128 | Transformation: sigmoid  High: 0.8  Low: 0.5  K: 0.25  Weight: 10 | | Transformation: sigmoid  High: 0.7  Low: 0.3  K: 0.25  Weight: -0.217 | | Transformation: sigmoid  High: 0.7  Low: 0.4  K: 0.25  Weight: 0.065 | Weight: 1 | - | - | - | - |
| Job02 | 10 molecules | Transformation: sigmoid  High: 9  Low: 4  K: 0.25  Weight: 3 | | Transformation: sigmoid  High: 0.7  Low: 0.3  K: 0.25  Weight: -0.217 | | Transformation: sigmoid  High: 0.7  Low: 0.4  K: 0.25  Weight: 0.065 | Weight: 1 | Transformation: step  High: 11  Low: 6  Weight: 1 | Transformation: step  High: 3  Low: 0  Weight: 1 | Transformation: step  High: 6.3  Low: 2.5  Weight: 1 | - |
| Job03 | 10molecules | Batch Size: 128  Learning rate: 0.0001  Margin_threshold: 50  N_steps: 1000  Sigma: 128 | Transformation: sigmoid  High: 9  Low: 4  K: 0.25  Weight: 3 | | Transformation: sigmoid  High: 0.7  Low: 0.3  K: 0.25  Weight: -0.217 | | Transformation: sigmoid  High: 0.7  Low: 0.4  K: 0.25  Weight: 0.065 | - | Transformation: step  High: 12  Low: 8  Weight: 1 | Transformation: step  High: 3  Low: 1  Weight: 1 | Transformation: step  High: 5.6  Low: 3.5  Weight: 1 | - |
| Job04_Run01 | 70 molecules | Transformation: sigmoid  High: 9  Low: 4  K: 0.25  Weight: 5 | | Transformation: sigmoid  High: 0.7  Low: 0.3  K: 0.25  Weight: -0.217 | | Transformation: sigmoid  High: 0.7  Low: 0.4  K: 0.25  Weight: 0.065 | Weight: 1 | - | - | - | - |
| Job04_Run02 | 10 molecules | Transformation: sigmoid  High: 9  Low: 4  K: 0.25  Weight: 5 | | Transformation: sigmoid  High: 0.7  Low: 0.3  K: 0.25  Weight: -0.217 | | Transformation: sigmoid  High: 0.7  Low: 0.4  K: 0.25  Weight: 0.065 | - | Transformation: step  High: 11  Low: 6  Weight: 1 | Transformation: step  High: 3  Low: 0  Weight: 1 | Transformation: step  High: 6.3  Low: 2.5  Weight: 1 | - |
| Job05_Run01 | 10 molecules | Batch Size: 8  Learning rate: 0.0001  Margin_threshold: 50  N_steps: 1000  Sigma: 128 | Transformation: sigmoid  High: 9  Low: 4  K: 0.25  Weight: 3 | | Transformation: sigmoid  High: 0.7  Low: 0.3  K: 0.25  Weight: -0.217 | | Transformation: sigmoid  High: 0.7  Low: 0.4  K: 0.25  Weight: 0.065 | - | Transformation: step  High: 12  Low: 8  Weight: 1 | Transformation: step  High: 3  Low: 1  Weight: 1 | Transformation: step  High: 5.6  Low: 3.5  Weight: 1 | Transformation: reverse_sigmoid  High: -8  Low: -14.0  K: 0.25  Weight: 1 |
| Job05_Run02 | 10 molecules | Transformation: sigmoid  High: 9  Low: 4  K: 0.25  Weight: 3 | | Transformation: sigmoid  High: 0.7  Low: 0.3  K: 0.25  Weight: -0.217 | | Transformation: sigmoid  High: 0.7  Low: 0.4  K: 0.25  Weight: 0.065 | - | Transformation: step  High: 12  Low: 8  Weight: 1 | Transformation: step  High: 3  Low: 1  Weight: 1 | Transformation: step  High: 5.6  Low: 3.5  Weight: 1 |

*****The RET-targeting inhibitors utilized as inception compounds in this study were retrieved from BindingDB and ExCAPE-DB, consistent with those employed in the regression-based modeling phase. **QED:** Quantitative estimate of drug-likeness; **HBA:** Hydrogen Bond Acceptor; **HBD:** Hydrogen Bond Donor; **SLogP:** Calculated Partition Coefficient; **Docking:** DockStream Component from Reinvent


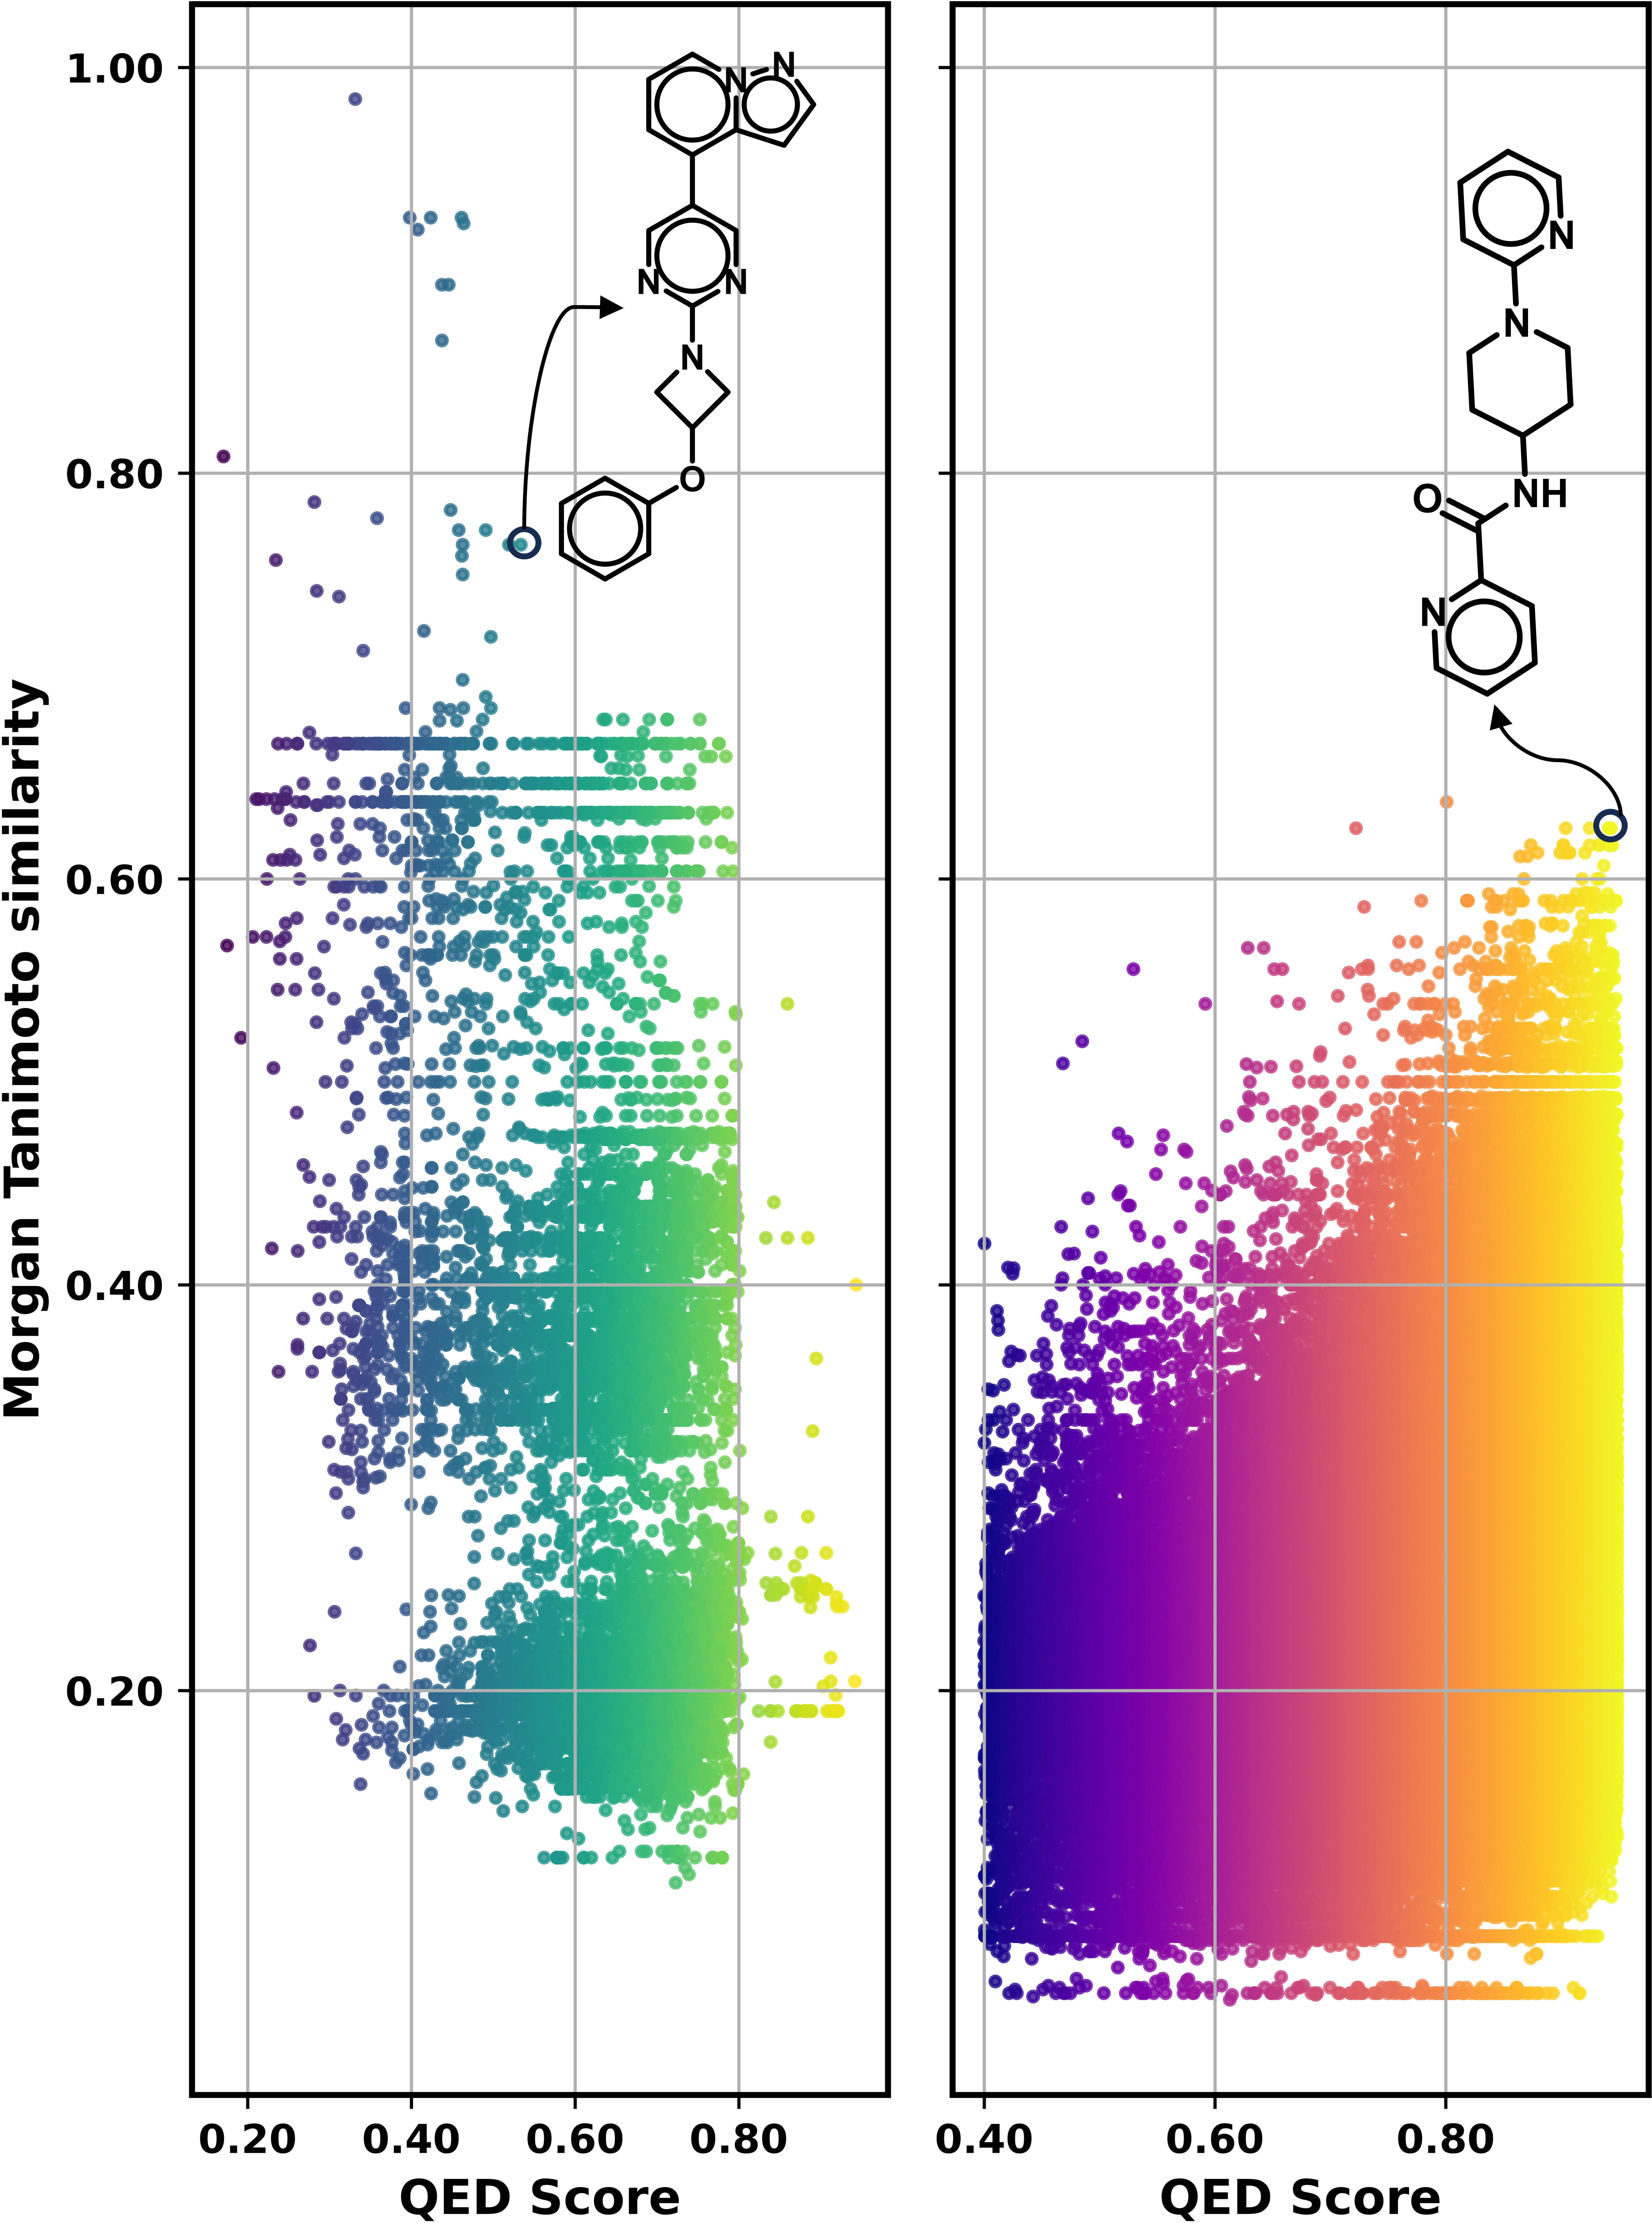


**Figure S16.** Comparison of QED and scaffold similarity distributions in reinforcement learning (RL)-generated molecules with and without scoring functions. (Left) shows the distribution of molecules generated using a multi-objective Reinforcement learning (RL) strategy incorporating QED, an in-house RET-MUT regression model, and an inception set of known RET inhibitors. (Right) displays the distribution from an RL job guided only by QED. In both cases, Bemis-Murcko scaffolds were extracted from the generated molecules and compared to known RET-like scaffolds using Morgan Tanimoto similarity. The plots display the relationship between QED score and scaffold similarity, with representative high-similarity to known RET inhibitors and good drug-likeness.

Notably, the RL model guided by RET-specific scoring functions and inception produced molecules with both higher Tanimoto similarity to known active scaffolds and high QED scores, indicating improved drug-likeness and relevance to the target. In contrast, the QED-only guided generation produced more diverse scaffolds with less RET-focused chemical space, despite generating drug-like structures. This analysis demonstrates that incorporating RET-specific guidance in RL improves the scaffold relevance and optimize lead-like properties of generated compounds.

**Table S6.** Tanimoto similarity scores (Morgan fingerprints) between core scaffolds from single-objective campaign-generated molecules and reference kinase hinge-binding cores curated from the in-house collection.

| JOBS | GEN_MOLS_CORES_ID | GEN_MOLS_CORES | RefCores_ID | RefCores | Morgan Tanimoto similarity |
| --- | --- | --- | --- | --- | --- |
| JOB01 | Reinforcement_learning_demo_1176 | c1ccc2cnccc2c1 | RefCore2 | c1ncc2cn[nH]c2n1 | 0.4074 |
| JOB01 | Reinforcement_learning_demo_3480 | c1ccc2cnccc2c1 | RefCore2 | c1ncc2cn[nH]c2n1 | 0.4074 |
| JOB01 | Reinforcement_learning_demo_963 | c1ccc2cnccc2c1 | RefCore2 | c1ncc2cn[nH]c2n1 | 0.4074 |
| JOB01 | Reinforcement_learning_demo_1114 | c1ccc2nccnc2c1 | RefCore48 | c1ccn2nccc2c1 | 0.5789 |
| JOB01 | Reinforcement_learning_demo_1185 | c1ccc2nccnc2c1 | RefCore48 | c1ccn2nccc2c1 | 0.5789 |
| JOB01 | Reinforcement_learning_demo_1482 | c1ccc2nccnc2c1 | RefCore48 | c1ccn2nccc2c1 | 0.5789 |
| JOB01 | Reinforcement_learning_demo_2764 | c1cnc2ncccc2c1 | RefCore48 | c1ccn2nccc2c1 | 0.5238 |
| JOB02 | Reinforcement_learning_demo_1140 | c1ccn2cncc2c1 | RefCore13 | C1=Nc2ncccc2C1 | 0.5385 |
| JOB02 | Reinforcement_learning_demo_1362 | c1cnc2nccnc2c1 | RefCore48 | c1ccn2nccc2c1 | 0.5455 |
| JOB02 | Reinforcement_learning_demo_1375 | c1cnc2nccnc2c1 | RefCore48 | c1ccn2nccc2c1 | 0.5455 |
| JOB02 | Reinforcement_learning_demo_1427 | c1cnc2nccnc2c1 | RefCore48 | c1ccn2nccc2c1 | 0.5455 |
| JOB02 | Reinforcement_learning_demo_1448 | c1ccn2nncc2c1 | RefCore10 | C1=Nc2nccnc2C1 | 0.4815 |
| JOB02 | Reinforcement_learning_demo_1478 | c1cnc2nccnc2c1 | RefCore48 | c1ccn2nccc2c1 | 0.5455 |
| JOB02 | Reinforcement_learning_demo_1479 | c1cnc2nccnc2c1 | RefCore48 | c1ccn2nccc2c1 | 0.5455 |
| JOB02 | Reinforcement_learning_demo_1480 | c1cnc2nccnc2c1 | RefCore48 | c1ccn2nccc2c1 | 0.5455 |
| JOB02 | Reinforcement_learning_demo_1495 | c1ccc2nccnc2c1 | RefCore48 | c1ccn2nccc2c1 | 0.5789 |
| JOB02 | Reinforcement_learning_demo_1496 | c1ccc2nccnc2c1 | RefCore48 | c1ccn2nccc2c1 | 0.5789 |
| JOB02 | Reinforcement_learning_demo_1497 | c1ccc2nccnc2c1 | RefCore48 | c1ccn2nccc2c1 | 0.5789 |
| JOB02 | Reinforcement_learning_demo_1499 | c1ccc2nccnc2c1 | RefCore48 | c1ccn2nccc2c1 | 0.5789 |
| JOB02 | Reinforcement_learning_demo_1514 | c1cnc2ncsc2c1 | RefCore48 | c1ccn2nccc2c1 | 0.3103 |
| JOB02 | Reinforcement_learning_demo_1538 | C1CCC2NCNC2C1 | RefCore37 | C1=Cc2ccccc2[N]1 | 0.0690 |
| JOB02 | Reinforcement_learning_demo_1565 | c1ccc2ocnc2c1 | RefCore48 | c1ccn2nccc2c1 | 0.3333 |
| JOB02 | Reinforcement_learning_demo_1566 | c1ccc2ocnc2c1 | RefCore48 | c1ccn2nccc2c1 | 0.3333 |
| JOB02 | Reinforcement_learning_demo_1667 | c1ccc2ocnc2c1 | RefCore48 | c1ccn2nccc2c1 | 0.3333 |
| JOB02 | Reinforcement_learning_demo_1686 | C1CCC2NCNC2C1 | RefCore37 | C1=Cc2ccccc2[N]1 | 0.0690 |
| JOB02 | Reinforcement_learning_demo_1687 | C1CCC2NCNC2C1 | RefCore37 | C1=Cc2ccccc2[N]1 | 0.0690 |
| JOB02 | Reinforcement_learning_demo_1728 | c1cnc2nccnc2c1 | RefCore48 | c1ccn2nccc2c1 | 0.5455 |
| JOB02 | Reinforcement_learning_demo_1734 | c1cnc2nccn2c1 | RefCore31 | c1ccc2c(c1)CN=N2 | 0.4615 |
| JOB02 | Reinforcement_learning_demo_1857 | c1ccc2nccnc2c1 | RefCore48 | c1ccn2nccc2c1 | 0.5789 |
| JOB02 | Reinforcement_learning_demo_1940 | c1ccc2nccnc2c1 | RefCore48 | c1ccn2nccc2c1 | 0.5789 |
| JOB02 | Reinforcement_learning_demo_1945 | c1cnc2ncccc2c1 | RefCore48 | c1ccn2nccc2c1 | 0.5238 |
| JOB02 | Reinforcement_learning_demo_1954 | c1ccc2ocnc2c1 | RefCore48 | c1ccn2nccc2c1 | 0.3333 |
| JOB02 | Reinforcement_learning_demo_1977 | c1ccc2nccnc2c1 | RefCore48 | c1ccn2nccc2c1 | 0.5789 |
| JOB02 | Reinforcement_learning_demo_1980 | C1CCC2NNCC2C1 | RefCore21 | c1ccc2c(c1)CN=N2 | 0.0286 |
| JOB02 | Reinforcement_learning_demo_2025 | c1cnc2ncccc2c1 | RefCore48 | c1ccn2nccc2c1 | 0.5238 |
| JOB02 | Reinforcement_learning_demo_2045 | c1cnc2cccnc2c1 | RefCore48 | c1ccn2nccc2c1 | 0.6667 |
| JOB02 | Reinforcement_learning_demo_2082 | c1cnc2ncccc2c1 | RefCore48 | c1ccn2nccc2c1 | 0.5238 |
| JOB02 | Reinforcement_learning_demo_2085 | c1cnc2cncnc2c1 | RefCore48 | c1ccn2nccc2c1 | 0.4615 |
| JOB02 | Reinforcement_learning_demo_2087 | c1ccc2nccnc2c1 | RefCore48 | c1ccn2nccc2c1 | 0.5789 |
| JOB02 | Reinforcement_learning_demo_2170 | C1CCC2NNCC2C1 | RefCore21 | c1ccc2c(c1)CN=N2 | 0.0286 |
| JOB02 | Reinforcement_learning_demo_2176 | c1ccc2nccnc2c1 | RefCore48 | c1ccn2nccc2c1 | 0.5789 |
| JOB02 | Reinforcement_learning_demo_2193 | c1cnc2nccnc2c1 | RefCore48 | c1ccn2nccc2c1 | 0.5455 |
| JOB02 | Reinforcement_learning_demo_2206 | C1CNC2NNNC2C1 | RefCore21 | c1ccc2c(c1)CN=N2 | 0.0270 |
| JOB02 | Reinforcement_learning_demo_2235 | c1cnc2ncccc2c1 | RefCore48 | c1ccn2nccc2c1 | 0.5238 |
| JOB02 | Reinforcement_learning_demo_2291 | C1CCC2NNCC2C1 | RefCore21 | c1ccc2c(c1)CN=N2 | 0.0286 |
| JOB02 | Reinforcement_learning_demo_2311 | C1CNC2NNCC2C1 | RefCore21 | c1ccc2c(c1)CN=N2 | 0.0263 |
| JOB02 | Reinforcement_learning_demo_2315 | c1cnc2nccnc2c1 | RefCore48 | c1ccn2nccc2c1 | 0.5455 |
| JOB02 | Reinforcement_learning_demo_2323 | c1cnc2nccnc2c1 | RefCore48 | c1ccn2nccc2c1 | 0.5455 |
| JOB02 | Reinforcement_learning_demo_2328 | c1cnc2ncccc2c1 | RefCore48 | c1ccn2nccc2c1 | 0.5238 |
| JOB02 | Reinforcement_learning_demo_2334 | c1ccc2ocnc2c1 | RefCore48 | c1ccn2nccc2c1 | 0.3333 |
| JOB02 | Reinforcement_learning_demo_2360 | c1cnc2ncccc2c1 | RefCore48 | c1ccn2nccc2c1 | 0.5238 |
| JOB02 | Reinforcement_learning_demo_2369 | c1cnc2nccnc2c1 | RefCore48 | c1ccn2nccc2c1 | 0.5455 |
| JOB02 | Reinforcement_learning_demo_2374 | c1cnc2ncccc2c1 | RefCore48 | c1ccn2nccc2c1 | 0.5238 |
| JOB02 | Reinforcement_learning_demo_2396 | C1CCC2NNCC2C1 | RefCore21 | c1ccc2c(c1)CN=N2 | 0.0286 |
| JOB02 | Reinforcement_learning_demo_2407 | c1cnc2cccnc2c1 | RefCore48 | c1ccn2nccc2c1 | 0.6667 |
| JOB02 | Reinforcement_learning_demo_2414 | C1CC2CNCNC2N1 | RefCore25 | c1cc2nc[nH]c2cn1 | 0.0541 |
| JOB02 | Reinforcement_learning_demo_2435 | c1cnc2ncccc2c1 | RefCore48 | c1ccn2nccc2c1 | 0.5238 |
| JOB02 | Reinforcement_learning_demo_2550 | c1cnc2ncccc2c1 | RefCore48 | c1ccn2nccc2c1 | 0.5238 |
| JOB02 | Reinforcement_learning_demo_2555 | c1cnc2ncccc2c1 | RefCore48 | c1ccn2nccc2c1 | 0.5238 |
| JOB02 | Reinforcement_learning_demo_2564 | c1ccc2nncnc2c1 | RefCore48 | c1ccn2nccc2c1 | 0.3462 |
| JOB02 | Reinforcement_learning_demo_2564 | c1cnc2nncn2c1 | RefCore27 | C1=Nc2ccccc2C1 | 0.4333 |
| JOB02 | Reinforcement_learning_demo_2570 | c1cnc2ncccc2c1 | RefCore48 | c1ccn2nccc2c1 | 0.5238 |
| JOB02 | Reinforcement_learning_demo_2603 | C1CCC2NCNC2C1 | RefCore37 | C1=Cc2ccccc2[N]1 | 0.0690 |
| JOB02 | Reinforcement_learning_demo_2631 | C1CCC2NCNC2C1 | RefCore37 | C1=Cc2ccccc2[N]1 | 0.0690 |
| JOB02 | Reinforcement_learning_demo_2634 | c1cnc2nccnc2c1 | RefCore48 | c1ccn2nccc2c1 | 0.5455 |
| JOB02 | Reinforcement_learning_demo_2652 | c1ccc2ncncc2c1 | RefCore48 | c1ccn2nccc2c1 | 0.4800 |
| JOB02 | Reinforcement_learning_demo_2653 | c1cnc2ncccc2c1 | RefCore48 | c1ccn2nccc2c1 | 0.5238 |
| JOB02 | Reinforcement_learning_demo_2687 | c1cnc2ncccc2c1 | RefCore48 | c1ccn2nccc2c1 | 0.5238 |
| JOB02 | Reinforcement_learning_demo_2768 | C1CCC2NCNC2C1 | RefCore37 | C1=Cc2ccccc2[N]1 | 0.0690 |
| JOB02 | Reinforcement_learning_demo_2788 | c1cnc2nccnc2c1 | RefCore48 | c1ccn2nccc2c1 | 0.5455 |
| JOB02 | Reinforcement_learning_demo_2789 | c1cnc2nccnc2c1 | RefCore48 | c1ccn2nccc2c1 | 0.5455 |
| JOB02 | Reinforcement_learning_demo_2794 | C1CNC2NCCC2C1 | RefCore25 | c1cc2nc[nH]c2cn1 | 0.0588 |
| JOB02 | Reinforcement_learning_demo_2802 | c1ccc2ocnc2c1 | RefCore48 | c1ccn2nccc2c1 | 0.3333 |
| JOB02 | Reinforcement_learning_demo_2809 | c1ccc2nccnc2c1 | RefCore48 | c1ccn2nccc2c1 | 0.5789 |
| JOB02 | Reinforcement_learning_demo_2816 | c1cnc2cnccc2c1 | RefCore48 | c1ccn2nccc2c1 | 0.5833 |
| JOB02 | Reinforcement_learning_demo_2829 | c1cnc2ncccc2c1 | RefCore48 | c1ccn2nccc2c1 | 0.5238 |
| JOB02 | Reinforcement_learning_demo_2830 | c1cnc2ncccc2c1 | RefCore48 | c1ccn2nccc2c1 | 0.5238 |
| JOB02 | Reinforcement_learning_demo_2880 | C1CCC2NCNC2C1 | RefCore37 | C1=Cc2ccccc2[N]1 | 0.0690 |
| JOB02 | Reinforcement_learning_demo_2882 | C1CNC2NCCC2C1 | RefCore25 | c1cc2nc[nH]c2cn1 | 0.0588 |
| JOB02 | Reinforcement_learning_demo_2894 | C1CCC2NNNC2C1 | RefCore21 | c1ccc2c(c1)CN=N2 | 0.0333 |
| JOB02 | Reinforcement_learning_demo_2975 | c1ccc2ncncc2c1 | RefCore48 | c1ccn2nccc2c1 | 0.4800 |
| JOB02 | Reinforcement_learning_demo_699 | c1ccn2cc[nH+]c2c1 | RefCore31 | c1ccc2c(c1)CN=N2 | 0.3333 |
| JOB03 | Reinforcement_learning_demo_128 | C1C[CH]2CC[CH](C1)N2 | RefCore21 | c1ccc2c(c1)CN=N2 | 0.0345 |
| JOB03 | Reinforcement_learning_demo_1904 | C1C[CH]2CC[NH2+]C[CH]2N1 | RefCore9 | c1ccc2[nH]cnc2c1 | 0.0526 |
| JOB03 | Reinforcement_learning_demo_1969 | C1NCC12COC2 | RefCore21 | c1ccc2c(c1)CN=N2 | 0.0323 |
| JOB03 | Reinforcement_learning_demo_2054 | C1C[CH]2CCN[CH]2C1 | RefCore21 | c1ccc2c(c1)CN=N2 | 0.0294 |
| JOB03 | Reinforcement_learning_demo_2151 | c1ccc2ncncc2c1 | RefCore48 | c1ccn2nccc2c1 | 0.4800 |
| JOB03 | Reinforcement_learning_demo_2183 | c1ccc2nccnc2c1 | RefCore48 | c1ccn2nccc2c1 | 0.5789 |
| JOB03 | Reinforcement_learning_demo_2204 | c1ccc2nccnc2c1 | RefCore48 | c1ccn2nccc2c1 | 0.5789 |
| JOB03 | Reinforcement_learning_demo_2256 | C1CNC2NNCC2C1 | RefCore21 | c1ccc2c(c1)CN=N2 | 0.0263 |
| JOB03 | Reinforcement_learning_demo_2314 | C1CCC2NCNC2C1 | RefCore37 | C1=Cc2ccccc2[N]1 | 0.0690 |
| JOB03 | Reinforcement_learning_demo_2380 | c1cnc2nccnc2c1 | RefCore48 | c1ccn2nccc2c1 | 0.5455 |
| JOB03 | Reinforcement_learning_demo_2398 | c1cnc2ncnnc2c1 | RefCore48 | c1ccn2nccc2c1 | 0.3929 |
| JOB03 | Reinforcement_learning_demo_2432 | C1CNC2NNCC2C1 | RefCore21 | c1ccc2c(c1)CN=N2 | 0.0263 |
| JOB03 | Reinforcement_learning_demo_2530 | c1ccc2ncncc2c1 | RefCore48 | c1ccn2nccc2c1 | 0.4800 |
| JOB03 | Reinforcement_learning_demo_2551 | c1ccc2nccnc2c1 | RefCore48 | c1ccn2nccc2c1 | 0.5789 |
| JOB03 | Reinforcement_learning_demo_2598 | c1ccc2nccnc2c1 | RefCore48 | c1ccn2nccc2c1 | 0.5789 |
| JOB03 | Reinforcement_learning_demo_2623 | C1CNC2NNCC2C1 | RefCore21 | c1ccc2c(c1)CN=N2 | 0.0263 |
| JOB03 | Reinforcement_learning_demo_2646 | c1ccc2ncncc2c1 | RefCore48 | c1ccn2nccc2c1 | 0.4800 |
| JOB03 | Reinforcement_learning_demo_2651 | c1cnc2nccnc2c1 | RefCore48 | c1ccn2nccc2c1 | 0.5455 |
| JOB03 | Reinforcement_learning_demo_2670 | c1cnc2ncncc2c1 | RefCore1 | c1ncc2cc[nH]c2n1 | 0.4000 |
| JOB03 | Reinforcement_learning_demo_2698 | c1cnc2ncncc2c1 | RefCore1 | c1ncc2cc[nH]c2n1 | 0.4000 |
| JOB03 | Reinforcement_learning_demo_2699 | c1cnc2ncncc2c1 | RefCore1 | c1ncc2cc[nH]c2n1 | 0.4000 |
| JOB03 | Reinforcement_learning_demo_2706 | c1cnc2ncncc2c1 | RefCore1 | c1ncc2cc[nH]c2n1 | 0.4000 |
| JOB03 | Reinforcement_learning_demo_2707 | c1cnc2ncncc2c1 | RefCore1 | c1ncc2cc[nH]c2n1 | 0.4000 |
| JOB03 | Reinforcement_learning_demo_2708 | c1cnc2ncncc2c1 | RefCore1 | c1ncc2cc[nH]c2n1 | 0.4000 |
| JOB03 | Reinforcement_learning_demo_2725 | c1cnc2ncncc2c1 | RefCore1 | c1ncc2cc[nH]c2n1 | 0.4000 |
| JOB03 | Reinforcement_learning_demo_2733 | C1CNC2NNCC2C1 | RefCore21 | c1ccc2c(c1)CN=N2 | 0.0263 |
| JOB03 | Reinforcement_learning_demo_2742 | c1cnc2ncnnc2c1 | RefCore48 | c1ccn2nccc2c1 | 0.3929 |
| JOB03 | Reinforcement_learning_demo_2773 | c1cnc2ncncc2c1 | RefCore1 | c1ncc2cc[nH]c2n1 | 0.4000 |
| JOB03 | Reinforcement_learning_demo_2831 | c1cnc2ncncc2c1 | RefCore1 | c1ncc2cc[nH]c2n1 | 0.4000 |
| JOB03 | Reinforcement_learning_demo_2832 | c1ccc2nncnc2c1 | RefCore48 | c1ccn2nccc2c1 | 0.3462 |
| JOB03 | Reinforcement_learning_demo_2842 | C1C[CH]2CC[CH]1N2 | RefCore21 | c1ccc2c(c1)CN=N2 | 0.0385 |
| JOB03 | Reinforcement_learning_demo_2843 | C1C[CH]2CC[CH]1N2 | RefCore21 | c1ccc2c(c1)CN=N2 | 0.0385 |
| JOB03 | Reinforcement_learning_demo_2946 | c1cnc2ncncc2c1 | RefCore1 | c1ncc2cc[nH]c2n1 | 0.4000 |
| JOB03 | Reinforcement_learning_demo_2985 | c1ccc2nccnc2c1 | RefCore48 | c1ccn2nccc2c1 | 0.5789 |
| JOB03 | Reinforcement_learning_demo_2993 | c1ccc2ncncc2c1 | RefCore48 | c1ccn2nccc2c1 | 0.4800 |
| JOB03 | Reinforcement_learning_demo_439 | C1[NH2+][CH]2CN[CH]1C2 | RefCore5 | c1cc2cncnn2c1 | 0.0811 |
| JOB03 | Reinforcement_learning_demo_745 | C1CC[CH]2CC[CH](C1)N2 | RefCore21 | c1ccc2c(c1)CN=N2 | 0.0345 |
| JOB04 | Reinforcement_learning_demo_1030 | c1ccn2cncc2c1 | RefCore13 | C1=Nc2ncccc2C1 | 0.5385 |
| JOB04 | Reinforcement_learning_demo_105 | C1CCN2CNCNC2C1 | RefCore37 | C1=Cc2ccccc2[N]1 | 0.0513 |
| JOB04 | Reinforcement_learning_demo_1073 | c1ccc2ocnc2c1 | RefCore48 | c1ccn2nccc2c1 | 0.3333 |
| JOB04 | Reinforcement_learning_demo_1073 | c1ccc2ocnc2c1 | RefCore48 | c1ccn2nccc2c1 | 0.3333 |
| JOB04 | Reinforcement_learning_demo_1159 | c1ccn2cncc2c1 | RefCore13 | C1=Nc2ncccc2C1 | 0.5385 |
| JOB04 | Reinforcement_learning_demo_1164 | c1cnc2nccnc2c1 | RefCore48 | c1ccn2nccc2c1 | 0.5455 |
| JOB04 | Reinforcement_learning_demo_1187 | c1cnc2nccnc2c1 | RefCore48 | c1ccn2nccc2c1 | 0.5455 |
| JOB04 | Reinforcement_learning_demo_1211 | c1cnc2ncoc2c1 | RefCore48 | c1ccn2nccc2c1 | 0.3103 |
| JOB04 | Reinforcement_learning_demo_1211 | c1cnc2ncoc2c1 | RefCore48 | c1ccn2nccc2c1 | 0.3103 |
| JOB04 | Reinforcement_learning_demo_1245 | c1ccc2nccnc2c1 | RefCore48 | c1ccn2nccc2c1 | 0.5789 |
| JOB04 | Reinforcement_learning_demo_1270 | c1cnc2ncncc2c1 | RefCore1 | c1ncc2cc[nH]c2n1 | 0.4000 |
| JOB04 | Reinforcement_learning_demo_1276 | c1ccc2nccnc2c1 | RefCore48 | c1ccn2nccc2c1 | 0.5789 |
| JOB04 | Reinforcement_learning_demo_1276 | c1ccc2nccnc2c1 | RefCore48 | c1ccn2nccc2c1 | 0.5789 |
| JOB04 | Reinforcement_learning_demo_1302 | C1CNC2NNCC2C1 | RefCore21 | c1ccc2c(c1)CN=N2 | 0.0263 |
| JOB04 | Reinforcement_learning_demo_131 | c1ccn2cncc2c1 | RefCore13 | C1=Nc2ncccc2C1 | 0.5385 |
| JOB04 | Reinforcement_learning_demo_1332 | C1CNC2NCNC2C1 | RefCore21 | c1ccc2c(c1)CN=N2 | 0.0278 |
| JOB04 | Reinforcement_learning_demo_1350 | c1ccc2nccnc2c1 | RefCore48 | c1ccn2nccc2c1 | 0.5789 |
| JOB04 | Reinforcement_learning_demo_1350 | c1ccc2nccnc2c1 | RefCore48 | c1ccn2nccc2c1 | 0.5789 |
| JOB04 | Reinforcement_learning_demo_1434 | c1ccc2nccnc2c1 | RefCore48 | c1ccn2nccc2c1 | 0.5789 |
| JOB04 | Reinforcement_learning_demo_1476 | c1cnc2ncccc2c1 | RefCore48 | c1ccn2nccc2c1 | 0.5238 |
| JOB04 | Reinforcement_learning_demo_15 | c1ccn2c(c1)cn1nccc12 | RefCore10 | C1=Nc2nccnc2C1 | 0.5172 |
| JOB04 | Reinforcement_learning_demo_1507 | c1cnc2ncccc2c1 | RefCore48 | c1ccn2nccc2c1 | 0.5238 |
| JOB04 | Reinforcement_learning_demo_1537 | c1cnc2nccnc2c1 | RefCore48 | c1ccn2nccc2c1 | 0.5455 |
| JOB04 | Reinforcement_learning_demo_1537 | c1cnc2nccnc2c1 | RefCore48 | c1ccn2nccc2c1 | 0.5455 |
| JOB04 | Reinforcement_learning_demo_1538 | c1cnc2nccnc2c1 | RefCore48 | c1ccn2nccc2c1 | 0.5455 |
| JOB04 | Reinforcement_learning_demo_1538 | c1cnc2nccnc2c1 | RefCore48 | c1ccn2nccc2c1 | 0.5455 |
| JOB04 | Reinforcement_learning_demo_16 | c1ccn2cncc2c1 | RefCore13 | C1=Nc2ncccc2C1 | 0.5385 |
| JOB04 | Reinforcement_learning_demo_1631 | c1cnc2cnc3nccn3c2c1 | RefCore48 | c1ccn2nccc2c1 | 0.3333 |
| JOB04 | Reinforcement_learning_demo_1631 | c1cnc2cnc3nccn3c2c1 | RefCore48 | c1ccn2nccc2c1 | 0.3333 |
| JOB04 | Reinforcement_learning_demo_1631 | c1cnc2cnc3nccn3c2c1 | RefCore48 | c1ccn2nccc2c1 | 0.3333 |
| JOB04 | Reinforcement_learning_demo_1651 | c1cnc2cnccc2c1 | RefCore48 | c1ccn2nccc2c1 | 0.5833 |
| JOB04 | Reinforcement_learning_demo_1651 | c1cnc2cnccc2c1 | RefCore48 | c1ccn2nccc2c1 | 0.5833 |
| JOB04 | Reinforcement_learning_demo_1651 | c1cnc2cnccc2c1 | RefCore48 | c1ccn2nccc2c1 | 0.5833 |
| JOB04 | Reinforcement_learning_demo_1663 | c1cnc2ncsc2c1 | RefCore48 | c1ccn2nccc2c1 | 0.3103 |
| JOB04 | Reinforcement_learning_demo_1663 | c1cnc2ncsc2c1 | RefCore48 | c1ccn2nccc2c1 | 0.3103 |
| JOB04 | Reinforcement_learning_demo_1663 | c1cnc2ncsc2c1 | RefCore48 | c1ccn2nccc2c1 | 0.3103 |
| JOB04 | Reinforcement_learning_demo_1684 | c1ccc2nccnc2c1 | RefCore48 | c1ccn2nccc2c1 | 0.5789 |
| JOB04 | Reinforcement_learning_demo_1684 | c1ccc2nccnc2c1 | RefCore48 | c1ccn2nccc2c1 | 0.5789 |
| JOB04 | Reinforcement_learning_demo_17 | c1ccn2cncc2c1 | RefCore13 | C1=Nc2ncccc2C1 | 0.5385 |
| JOB04 | Reinforcement_learning_demo_1707 | c1ccc2nccnc2c1 | RefCore48 | c1ccn2nccc2c1 | 0.5789 |
| JOB04 | Reinforcement_learning_demo_1708 | c1ccc2nccnc2c1 | RefCore48 | c1ccn2nccc2c1 | 0.5789 |
| JOB04 | Reinforcement_learning_demo_1827 | c1cnc2nccnc2c1 | RefCore48 | c1ccn2nccc2c1 | 0.5455 |
| JOB04 | Reinforcement_learning_demo_1840 | c1ccc2nccnc2c1 | RefCore48 | c1ccn2nccc2c1 | 0.5789 |
| JOB04 | Reinforcement_learning_demo_1863 | C1CCC2NNCC2C1 | RefCore21 | c1ccc2c(c1)CN=N2 | 0.0286 |
| JOB04 | Reinforcement_learning_demo_1863 | C1CCC2NNCC2C1 | RefCore21 | c1ccc2c(c1)CN=N2 | 0.0286 |
| JOB04 | Reinforcement_learning_demo_1896 | C1CCC2NCNC2C1 | RefCore37 | C1=Cc2ccccc2[N]1 | 0.0690 |
| JOB04 | Reinforcement_learning_demo_1896 | C1CCC2NCNC2C1 | RefCore37 | C1=Cc2ccccc2[N]1 | 0.0690 |
| JOB04 | Reinforcement_learning_demo_1901 | c1cnc2ncccc2c1 | RefCore48 | c1ccn2nccc2c1 | 0.5238 |
| JOB04 | Reinforcement_learning_demo_1901 | c1cnc2ncccc2c1 | RefCore48 | c1ccn2nccc2c1 | 0.5238 |
| JOB04 | Reinforcement_learning_demo_1914 | c1ccn2c(c1)nc1ncncc12 | RefCore42 | c1cnc2[nH]cnc2c1 | 0.3611 |
| JOB04 | Reinforcement_learning_demo_1931 | c1cnc2ncccc2c1 | RefCore48 | c1ccn2nccc2c1 | 0.5238 |
| JOB04 | Reinforcement_learning_demo_1996 | c1cnc2nccn2c1 | RefCore31 | c1ccc2c(c1)CN=N2 | 0.4615 |
| JOB04 | Reinforcement_learning_demo_2016 | c1cnc2nccnc2c1 | RefCore48 | c1ccn2nccc2c1 | 0.5455 |
| JOB04 | Reinforcement_learning_demo_2034 | C1CCN2NCNCC2C1 | RefCore37 | C1=Cc2ccccc2[N]1 | 0.0513 |
| JOB04 | Reinforcement_learning_demo_2079 | C1CCC2NCNC2C1 | RefCore37 | C1=Cc2ccccc2[N]1 | 0.0690 |
| JOB04 | Reinforcement_learning_demo_2080 | c1ccc2nccnc2c1 | RefCore48 | c1ccn2nccc2c1 | 0.5789 |
| JOB04 | Reinforcement_learning_demo_2081 | c1ccc2nccnc2c1 | RefCore48 | c1ccn2nccc2c1 | 0.5789 |
| JOB04 | Reinforcement_learning_demo_2123 | c1cnc2nccnc2c1 | RefCore48 | c1ccn2nccc2c1 | 0.5455 |
| JOB04 | Reinforcement_learning_demo_2132 | C1CCC2NCNC2C1 | RefCore37 | C1=Cc2ccccc2[N]1 | 0.0690 |
| JOB04 | Reinforcement_learning_demo_2179 | c1ccc2nccnc2c1 | RefCore48 | c1ccn2nccc2c1 | 0.5789 |
| JOB04 | Reinforcement_learning_demo_2179 | c1ccc2nccnc2c1 | RefCore48 | c1ccn2nccc2c1 | 0.5789 |
| JOB04 | Reinforcement_learning_demo_2259 | c1ccc2nncnc2c1 | RefCore48 | c1ccn2nccc2c1 | 0.3462 |
| JOB04 | Reinforcement_learning_demo_2289 | c1ccc2nccnc2c1 | RefCore48 | c1ccn2nccc2c1 | 0.5789 |
| JOB04 | Reinforcement_learning_demo_2298 | c1ccc2nccnc2c1 | RefCore48 | c1ccn2nccc2c1 | 0.5789 |
| JOB04 | Reinforcement_learning_demo_2305 | c1ccc2ocnc2c1 | RefCore48 | c1ccn2nccc2c1 | 0.3333 |
| JOB04 | Reinforcement_learning_demo_2307 | c1cnc2nccnc2c1 | RefCore48 | c1ccn2nccc2c1 | 0.5455 |
| JOB04 | Reinforcement_learning_demo_2372 | c1ccc2nccnc2c1 | RefCore48 | c1ccn2nccc2c1 | 0.5789 |
| JOB04 | Reinforcement_learning_demo_2384 | c1cnc2nccnc2c1 | RefCore48 | c1ccn2nccc2c1 | 0.5455 |
| JOB04 | Reinforcement_learning_demo_2386 | c1cnc2nccnc2c1 | RefCore48 | c1ccn2nccc2c1 | 0.5455 |
| JOB04 | Reinforcement_learning_demo_2386 | c1cnc2nccnc2c1 | RefCore48 | c1ccn2nccc2c1 | 0.5455 |
| JOB04 | Reinforcement_learning_demo_2395 | c1ccc2ncncc2c1 | RefCore48 | c1ccn2nccc2c1 | 0.4800 |
| JOB04 | Reinforcement_learning_demo_2411 | c1ccc2ncncc2c1 | RefCore48 | c1ccn2nccc2c1 | 0.4800 |
| JOB04 | Reinforcement_learning_demo_2417 | c1ccc2ocnc2c1 | RefCore48 | c1ccn2nccc2c1 | 0.3333 |
| JOB04 | Reinforcement_learning_demo_2428 | c1ccc2ncncc2c1 | RefCore48 | c1ccn2nccc2c1 | 0.4800 |
| JOB04 | Reinforcement_learning_demo_2429 | c1ccc2ncncc2c1 | RefCore48 | c1ccn2nccc2c1 | 0.4800 |
| JOB04 | Reinforcement_learning_demo_2439 | c1ccc2ncncc2c1 | RefCore48 | c1ccn2nccc2c1 | 0.4800 |
| JOB04 | Reinforcement_learning_demo_2441 | C1CCC2NCNC2C1 | RefCore37 | C1=Cc2ccccc2[N]1 | 0.0690 |
| JOB04 | Reinforcement_learning_demo_2442 | c1ccc2nccnc2c1 | RefCore48 | c1ccn2nccc2c1 | 0.5789 |
| JOB04 | Reinforcement_learning_demo_2442 | c1ccc2nccnc2c1 | RefCore48 | c1ccn2nccc2c1 | 0.5789 |
| JOB04 | Reinforcement_learning_demo_2458 | c1ccc2ncncc2c1 | RefCore48 | c1ccn2nccc2c1 | 0.4800 |
| JOB04 | Reinforcement_learning_demo_2477 | c1ccc2scnc2c1 | RefCore48 | c1ccn2nccc2c1 | 0.3333 |
| JOB04 | Reinforcement_learning_demo_2477 | c1ccc2scnc2c1 | RefCore48 | c1ccn2nccc2c1 | 0.3333 |
| JOB04 | Reinforcement_learning_demo_2505 | c1ccc2ncncc2c1 | RefCore48 | c1ccn2nccc2c1 | 0.4800 |
| JOB04 | Reinforcement_learning_demo_2510 | c1cnc2nccnc2c1 | RefCore48 | c1ccn2nccc2c1 | 0.5455 |
| JOB04 | Reinforcement_learning_demo_2561 | c1ccn2cncc2c1 | RefCore13 | C1=Nc2ncccc2C1 | 0.5385 |
| JOB04 | Reinforcement_learning_demo_2565 | C1CCC2NCNC2C1 | RefCore37 | C1=Cc2ccccc2[N]1 | 0.0690 |
| JOB04 | Reinforcement_learning_demo_2575 | c1cnc2ncncc2c1 | RefCore1 | c1ncc2cc[nH]c2n1 | 0.4000 |
| JOB04 | Reinforcement_learning_demo_2584 | c1ccc2nccnc2c1 | RefCore48 | c1ccn2nccc2c1 | 0.5789 |
| JOB04 | Reinforcement_learning_demo_2629 | c1ccc2oncc2c1 | RefCore48 | c1ccn2nccc2c1 | 0.2857 |
| JOB04 | Reinforcement_learning_demo_2682 | C1CCC2NNCC2C1 | RefCore21 | c1ccc2c(c1)CN=N2 | 0.0286 |
| JOB04 | Reinforcement_learning_demo_2682 | C1CCC2NNCC2C1 | RefCore21 | c1ccc2c(c1)CN=N2 | 0.0286 |
| JOB04 | Reinforcement_learning_demo_2714 | C1CCN2CCCC2C1 | RefCore37 | C1=Cc2ccccc2[N]1 | 0.0645 |
| JOB04 | Reinforcement_learning_demo_2720 | c1ccc2nccnc2c1 | RefCore48 | c1ccn2nccc2c1 | 0.5789 |
| JOB04 | Reinforcement_learning_demo_2770 | c1cnc2nccnc2c1 | RefCore48 | c1ccn2nccc2c1 | 0.5455 |
| JOB04 | Reinforcement_learning_demo_279 | c1ccn2cncc2c1 | RefCore13 | C1=Nc2ncccc2C1 | 0.5385 |
| JOB04 | Reinforcement_learning_demo_2901 | c1cnn2ncnc2c1 | RefCore33 | c1ccn2ccnc2c1 | 0.4643 |
| JOB04 | Reinforcement_learning_demo_3029 | c1ccn2cccc2c1 | RefCore10 | C1=Nc2nccnc2C1 | 0.4167 |
| JOB04 | Reinforcement_learning_demo_3055 | c1ccc2cnccc2c1 | RefCore2 | c1ncc2cn[nH]c2n1 | 0.4074 |
| JOB04 | Reinforcement_learning_demo_3089 | c1cnc2cccnc2c1 | RefCore48 | c1ccn2nccc2c1 | 0.6667 |
| JOB04 | Reinforcement_learning_demo_3093 | c1ccc2nccnc2c1 | RefCore48 | c1ccn2nccc2c1 | 0.5789 |
| JOB04 | Reinforcement_learning_demo_3095 | c1cnc2nccnc2c1 | RefCore48 | c1ccn2nccc2c1 | 0.5455 |
| JOB04 | Reinforcement_learning_demo_3120 | c1cnc2nccn2c1 | RefCore31 | c1ccc2c(c1)CN=N2 | 0.4615 |
| JOB04 | Reinforcement_learning_demo_3150 | c1cnc2nccnc2c1 | RefCore48 | c1ccn2nccc2c1 | 0.5455 |
| JOB04 | Reinforcement_learning_demo_3179 | c1ccc2scnc2c1 | RefCore48 | c1ccn2nccc2c1 | 0.3333 |
| JOB04 | Reinforcement_learning_demo_3185 | c1ccc2nccnc2c1 | RefCore48 | c1ccn2nccc2c1 | 0.5789 |
| JOB04 | Reinforcement_learning_demo_3240 | c1cnc2nccn2c1 | RefCore31 | c1ccc2c(c1)CN=N2 | 0.4615 |
| JOB04 | Reinforcement_learning_demo_3241 | c1cnc2nccn2c1 | RefCore31 | c1ccc2c(c1)CN=N2 | 0.4615 |
| JOB04 | Reinforcement_learning_demo_3248 | c1cnc2nccn2c1 | RefCore31 | c1ccc2c(c1)CN=N2 | 0.4615 |
| JOB04 | Reinforcement_learning_demo_3249 | c1cnc2nccn2c1 | RefCore31 | c1ccc2c(c1)CN=N2 | 0.4615 |
| JOB04 | Reinforcement_learning_demo_3260 | c1cnc2nccn2c1 | RefCore31 | c1ccc2c(c1)CN=N2 | 0.4615 |
| JOB04 | Reinforcement_learning_demo_3266 | c1ccc2ncncc2c1 | RefCore48 | c1ccn2nccc2c1 | 0.4800 |
| JOB04 | Reinforcement_learning_demo_3299 | c1ccc2nccnc2c1 | RefCore48 | c1ccn2nccc2c1 | 0.5789 |
| JOB04 | Reinforcement_learning_demo_3314 | C1CCC2NCNC2C1 | RefCore37 | C1=Cc2ccccc2[N]1 | 0.0690 |
| JOB04 | Reinforcement_learning_demo_3392 | c1cnc2nccn2c1 | RefCore31 | c1ccc2c(c1)CN=N2 | 0.4615 |
| JOB04 | Reinforcement_learning_demo_3393 | c1ccc2ncncc2c1 | RefCore48 | c1ccn2nccc2c1 | 0.4800 |
| JOB04 | Reinforcement_learning_demo_3425 | C1CCN2CCCNC2C1 | RefCore37 | C1=Cc2ccccc2[N]1 | 0.0556 |
| JOB04 | Reinforcement_learning_demo_3427 | C1CNC2NNCC2C1 | RefCore21 | c1ccc2c(c1)CN=N2 | 0.0263 |
| JOB04 | Reinforcement_learning_demo_3428 | C1CCC2NCNC2C1 | RefCore37 | C1=Cc2ccccc2[N]1 | 0.0690 |
| JOB04 | Reinforcement_learning_demo_3462 | C1CCC2NCNC2C1 | RefCore37 | C1=Cc2ccccc2[N]1 | 0.0690 |
| JOB04 | Reinforcement_learning_demo_43 | c1ccn2cncc2c1 | RefCore13 | C1=Nc2ncccc2C1 | 0.5385 |
| JOB04 | Reinforcement_learning_demo_44 | c1ccn2cncc2c1 | RefCore13 | C1=Nc2ncccc2C1 | 0.5385 |
| JOB04 | Reinforcement_learning_demo_6 | c1ccn2cncc2c1 | RefCore13 | C1=Nc2ncccc2C1 | 0.5385 |
| JOB04 | Reinforcement_learning_demo_8 | c1ccn2cncc2c1 | RefCore13 | C1=Nc2ncccc2C1 | 0.5385 |
| JOB04 | Reinforcement_learning_demo_9 | c1ccn2cncc2c1 | RefCore13 | C1=Nc2ncccc2C1 | 0.5385 |
| JOB04 | Reinforcement_learning_demo_955 | c1ccn2cncc2c1 | RefCore13 | C1=Nc2ncccc2C1 | 0.5385 |
| JOB05 | Reinforcement_learning_DockStream_demo_1004 | c1cnc2scnc2c1 | RefCore48 | c1ccn2nccc2c1 | 0.4074 |
| JOB05 | Reinforcement_learning_DockStream_demo_1007 | C1CCC2NNCC2C1 | RefCore21 | c1ccc2c(c1)CN=N2 | 0.0286 |
| JOB05 | Reinforcement_learning_DockStream_demo_1009 | C1CNC2NCCC2C1 | RefCore25 | c1cc2nc[nH]c2cn1 | 0.0588 |
| JOB05 | Reinforcement_learning_DockStream_demo_101 | c1ccn2nc3c(c2c1)CC[NH2+][C@@H]1CCCC[C@H]31 | RefCore10 | C1=Nc2nccnc2C1 | 0.2609 |
| JOB05 | Reinforcement_learning_DockStream_demo_1022 | C1CNC2NNCC2C1 | RefCore21 | c1ccc2c(c1)CN=N2 | 0.0263 |
| JOB05 | Reinforcement_learning_DockStream_demo_1023 | C1CCC2NNCC2C1 | RefCore21 | c1ccc2c(c1)CN=N2 | 0.0286 |
| JOB05 | Reinforcement_learning_DockStream_demo_1028 | C1CCC2NNCC2C1 | RefCore21 | c1ccc2c(c1)CN=N2 | 0.0286 |
| JOB05 | Reinforcement_learning_DockStream_demo_104 | c1ccn2nc3c(c2c1)CCCNC3 | RefCore10 | C1=Nc2nccnc2C1 | 0.2683 |
| JOB05 | Reinforcement_learning_DockStream_demo_1042 | c1ccn2nc3c(c2c1)CCCNC3 | RefCore10 | C1=Nc2nccnc2C1 | 0.2683 |
| JOB05 | Reinforcement_learning_DockStream_demo_1050 | C1CNC2NCCC2C1 | RefCore25 | c1cc2nc[nH]c2cn1 | 0.0588 |
| JOB05 | Reinforcement_learning_DockStream_demo_1060 | C1CNC2NCCC2C1 | RefCore25 | c1cc2nc[nH]c2cn1 | 0.0588 |
| JOB05 | Reinforcement_learning_DockStream_demo_1071 | C1CCC2NNCC2C1 | RefCore21 | c1ccc2c(c1)CN=N2 | 0.0286 |
| JOB05 | Reinforcement_learning_DockStream_demo_1074 | C1CNC2NCCC2C1 | RefCore25 | c1cc2nc[nH]c2cn1 | 0.0588 |
| JOB05 | Reinforcement_learning_DockStream_demo_1075 | C1CNC2NCCC2C1 | RefCore25 | c1cc2nc[nH]c2cn1 | 0.0588 |
| JOB05 | Reinforcement_learning_DockStream_demo_108 | c1ccc2ncncc2c1 | RefCore48 | c1ccn2nccc2c1 | 0.4800 |
| JOB05 | Reinforcement_learning_DockStream_demo_1082 | C1CNC2NCCC2C1 | RefCore25 | c1cc2nc[nH]c2cn1 | 0.0588 |
| JOB05 | Reinforcement_learning_DockStream_demo_1090 | C1CCC2NNCC2C1 | RefCore21 | c1ccc2c(c1)CN=N2 | 0.0286 |
| JOB05 | Reinforcement_learning_DockStream_demo_1110 | C1CCC2NNCC2C1 | RefCore21 | c1ccc2c(c1)CN=N2 | 0.0286 |
| JOB05 | Reinforcement_learning_DockStream_demo_1114 | C1CNC2NCCC2C1 | RefCore25 | c1cc2nc[nH]c2cn1 | 0.0588 |
| JOB05 | Reinforcement_learning_DockStream_demo_112 | C1CCC2NNCC2C1 | RefCore21 | c1ccc2c(c1)CN=N2 | 0.0286 |
| JOB05 | Reinforcement_learning_DockStream_demo_1124 | C1=CC2C(CCC3CCCOC32)OC1 | RefCore37 | C1=Cc2ccccc2[N]1 | 0.0682 |
| JOB05 | Reinforcement_learning_DockStream_demo_113 | c1ccn2nc3c(c2c1)CCC[NH2+]C3 | RefCore10 | C1=Nc2nccnc2C1 | 0.2683 |
| JOB05 | Reinforcement_learning_DockStream_demo_1134 | C1CCC2NCNC2C1 | RefCore37 | C1=Cc2ccccc2[N]1 | 0.0690 |
| JOB05 | Reinforcement_learning_DockStream_demo_1153 | c1ccc2ccccc2c1 | RefCore48 | c1ccn2nccc2c1 | 0.3889 |
| JOB05 | Reinforcement_learning_DockStream_demo_1161 | C1CNC2NCCC2C1 | RefCore25 | c1cc2nc[nH]c2cn1 | 0.0588 |
| JOB05 | Reinforcement_learning_DockStream_demo_1167 | C1CNC2NCCC2C1 | RefCore25 | c1cc2nc[nH]c2cn1 | 0.0588 |
| JOB05 | Reinforcement_learning_DockStream_demo_1170 | c1cnc2cnccc2c1 | RefCore48 | c1ccn2nccc2c1 | 0.5833 |
| JOB05 | Reinforcement_learning_DockStream_demo_1173 | c1cnc2c(c1)C[NH2+]CC2 | RefCore5 | c1cc2cncnn2c1 | 0.3429 |
| JOB05 | Reinforcement_learning_DockStream_demo_1174 | C1CCC2CCCCC2CC1 | RefCore9 | c1ccc2[nH]cnc2c1 | 0.0769 |
| JOB05 | Reinforcement_learning_DockStream_demo_118 | c1ccn2nc3c(c2c1)CC[NH2+][C@H]1CCC[C@H]31 | RefCore10 | C1=Nc2nccnc2C1 | 0.2609 |
| JOB05 | Reinforcement_learning_DockStream_demo_119 | c1ccn2nc3c(c2c1)CCCNC3 | RefCore10 | C1=Nc2nccnc2C1 | 0.2683 |
| JOB05 | Reinforcement_learning_DockStream_demo_1192 | c1ccc2cnccc2c1 | RefCore2 | c1ncc2cn[nH]c2n1 | 0.4074 |
| JOB05 | Reinforcement_learning_DockStream_demo_121 | C1CCC2NCCC2C1 | RefCore21 | c1ccc2c(c1)CN=N2 | 0.0294 |
| JOB05 | Reinforcement_learning_DockStream_demo_1237 | C1CNC2NCCC2C1 | RefCore25 | c1cc2nc[nH]c2cn1 | 0.0588 |
| JOB05 | Reinforcement_learning_DockStream_demo_1240 | C1C2CC3CC1CC(C2)C3 | RefCore37 | C1=Cc2ccccc2[N]1 | 0.0435 |
| JOB05 | Reinforcement_learning_DockStream_demo_1279 | C1CCC2NCCC2C1 | RefCore21 | c1ccc2c(c1)CN=N2 | 0.0294 |
| JOB05 | Reinforcement_learning_DockStream_demo_129 | c1ccn2nc3c(c2c1)CC[NH+]1CCC[C@H]31 | RefCore10 | C1=Nc2nccnc2C1 | 0.2727 |
| JOB05 | Reinforcement_learning_DockStream_demo_13 | c1ccn2nc3c(c2c1)CCC[NH2+]C3 | RefCore10 | C1=Nc2nccnc2C1 | 0.2683 |
| JOB05 | Reinforcement_learning_DockStream_demo_1307 | c1ccn2nc3c(c2c1)CCC[NH2+]C3 | RefCore10 | C1=Nc2nccnc2C1 | 0.2683 |
| JOB05 | Reinforcement_learning_DockStream_demo_1314 | C1CCC2NNCC2C1 | RefCore21 | c1ccc2c(c1)CN=N2 | 0.0286 |
| JOB05 | Reinforcement_learning_DockStream_demo_132 | c1cnc2cnccc2c1 | RefCore48 | c1ccn2nccc2c1 | 0.5833 |
| JOB05 | Reinforcement_learning_DockStream_demo_1353 | C1CCC2NNCC2C1 | RefCore21 | c1ccc2c(c1)CN=N2 | 0.0286 |
| JOB05 | Reinforcement_learning_DockStream_demo_1358 | C1CNC2NCCC2C1 | RefCore25 | c1cc2nc[nH]c2cn1 | 0.0588 |
| JOB05 | Reinforcement_learning_DockStream_demo_1369 | C1CCC2NNCC2C1 | RefCore21 | c1ccc2c(c1)CN=N2 | 0.0286 |
| JOB05 | Reinforcement_learning_DockStream_demo_137 | c1ccn2nc3c(c2c1)CCCNC3 | RefCore10 | C1=Nc2nccnc2C1 | 0.2683 |
| JOB05 | Reinforcement_learning_DockStream_demo_1380 | c1ccc2c(c1)CCCC2 | RefCore6 | C1=Nc2ncccc2C1 | 0.3333 |
| JOB05 | Reinforcement_learning_DockStream_demo_1396 | C1CCC2NNCC2C1 | RefCore21 | c1ccc2c(c1)CN=N2 | 0.0286 |
| JOB05 | Reinforcement_learning_DockStream_demo_140 | c1ccn2nc3c(c2c1)CCCNC3 | RefCore10 | C1=Nc2nccnc2C1 | 0.2683 |
| JOB05 | Reinforcement_learning_DockStream_demo_1410 | C1CNC2NCCC2C1 | RefCore25 | c1cc2nc[nH]c2cn1 | 0.0588 |
| JOB05 | Reinforcement_learning_DockStream_demo_1411 | C1CCC2NNCC2C1 | RefCore21 | c1ccc2c(c1)CN=N2 | 0.0286 |
| JOB05 | Reinforcement_learning_DockStream_demo_142 | c1ccn2nc3c(c2c1)CCCC[NH2+]3 | RefCore10 | C1=Nc2nccnc2C1 | 0.2750 |
| JOB05 | Reinforcement_learning_DockStream_demo_1420 | C1CCC2NNCC2C1 | RefCore21 | c1ccc2c(c1)CN=N2 | 0.0286 |
| JOB05 | Reinforcement_learning_DockStream_demo_1424 | c1ccc2oncc2c1 | RefCore48 | c1ccn2nccc2c1 | 0.2857 |
| JOB05 | Reinforcement_learning_DockStream_demo_1426 | C1CCC2NNCC2C1 | RefCore21 | c1ccc2c(c1)CN=N2 | 0.0286 |
| JOB05 | Reinforcement_learning_DockStream_demo_1440 | c1ccc2occc2c1 | RefCore32 | C1=NCc2ccccc21 | 0.3000 |
| JOB05 | Reinforcement_learning_DockStream_demo_1456 | C1CNC2CNCC2C1 | RefCore21 | c1ccc2c(c1)CN=N2 | 0.0270 |
| JOB05 | Reinforcement_learning_DockStream_demo_1462 | C1CCC2NNCC2C1 | RefCore21 | c1ccc2c(c1)CN=N2 | 0.0286 |
| JOB05 | Reinforcement_learning_DockStream_demo_1469 | C1=CC2(CCNCC2)c2ccccc21 | RefCore35 | c1cnn2ccnc2c1 | 0.2222 |
| JOB05 | Reinforcement_learning_DockStream_demo_1480 | c1cnc2nccn2c1 | RefCore31 | c1ccc2c(c1)CN=N2 | 0.4615 |
| JOB05 | Reinforcement_learning_DockStream_demo_1485 | C1CCC2NNCC2C1 | RefCore21 | c1ccc2c(c1)CN=N2 | 0.0286 |
| JOB05 | Reinforcement_learning_DockStream_demo_1489 | C1CNC2NCCC2C1 | RefCore25 | c1cc2nc[nH]c2cn1 | 0.0588 |
| JOB05 | Reinforcement_learning_DockStream_demo_1515 | C1CCC2NNCC2C1 | RefCore21 | c1ccc2c(c1)CN=N2 | 0.0286 |
| JOB05 | Reinforcement_learning_DockStream_demo_1536 | c1ccc2nocc2c1 | RefCore48 | c1ccn2nccc2c1 | 0.3846 |
| JOB05 | Reinforcement_learning_DockStream_demo_1542 | C1CCC2NNCC2C1 | RefCore21 | c1ccc2c(c1)CN=N2 | 0.0286 |
| JOB05 | Reinforcement_learning_DockStream_demo_1551 | C1CCC2NCNC2C1 | RefCore37 | C1=Cc2ccccc2[N]1 | 0.0690 |
| JOB05 | Reinforcement_learning_DockStream_demo_1555 | C1CNC2NCCC2C1 | RefCore25 | c1cc2nc[nH]c2cn1 | 0.0588 |
| JOB05 | Reinforcement_learning_DockStream_demo_1561 | C1CNC2NCCC2C1 | RefCore25 | c1cc2nc[nH]c2cn1 | 0.0588 |
| JOB05 | Reinforcement_learning_DockStream_demo_1566 | c1ccc2c(c1)CC1CCCC3NCC2C13 | RefCore6 | C1=Nc2ncccc2C1 | 0.1818 |
| JOB05 | Reinforcement_learning_DockStream_demo_157 | c1ccn2nc3c(c2c1)CCCNC3 | RefCore10 | C1=Nc2nccnc2C1 | 0.2683 |
| JOB05 | Reinforcement_learning_DockStream_demo_1575 | C1CCC2NNCC2C1 | RefCore21 | c1ccc2c(c1)CN=N2 | 0.0286 |
| JOB05 | Reinforcement_learning_DockStream_demo_158 | c1ccn2nc3c(c2c1)CCCNC3 | RefCore10 | C1=Nc2nccnc2C1 | 0.2683 |
| JOB05 | Reinforcement_learning_DockStream_demo_161 | c1ccn2nc3c(c2c1)CCC[NH2+]C3 | RefCore10 | C1=Nc2nccnc2C1 | 0.2683 |
| JOB05 | Reinforcement_learning_DockStream_demo_1615 | C1CNC2NCCC2C1 | RefCore25 | c1cc2nc[nH]c2cn1 | 0.0588 |
| JOB05 | Reinforcement_learning_DockStream_demo_1624 | C1CCC2NNCC2C1 | RefCore21 | c1ccc2c(c1)CN=N2 | 0.0286 |
| JOB05 | Reinforcement_learning_DockStream_demo_1626 | C1C[C@H]2C[C@@H]1C2 | RefCore37 | C1=Cc2ccccc2[N]1 | 0.0400 |
| JOB05 | Reinforcement_learning_DockStream_demo_1628 | C1CCC2NNCC2C1 | RefCore21 | c1ccc2c(c1)CN=N2 | 0.0286 |
| JOB05 | Reinforcement_learning_DockStream_demo_1636 | C1CNC2NCCC2C1 | RefCore25 | c1cc2nc[nH]c2cn1 | 0.0588 |
| JOB05 | Reinforcement_learning_DockStream_demo_1645 | C1CNC2NCCC2C1 | RefCore25 | c1cc2nc[nH]c2cn1 | 0.0588 |
| JOB05 | Reinforcement_learning_DockStream_demo_1648 | C1CNC2NCCC2C1 | RefCore25 | c1cc2nc[nH]c2cn1 | 0.0588 |
| JOB05 | Reinforcement_learning_DockStream_demo_1657 | C1CNC2NCCC2C1 | RefCore25 | c1cc2nc[nH]c2cn1 | 0.0588 |
| JOB05 | Reinforcement_learning_DockStream_demo_1661 | C1CNC2NCCC2C1 | RefCore25 | c1cc2nc[nH]c2cn1 | 0.0588 |
| JOB05 | Reinforcement_learning_DockStream_demo_1664 | C1CNC2NCCC2C1 | RefCore25 | c1cc2nc[nH]c2cn1 | 0.0588 |
| JOB05 | Reinforcement_learning_DockStream_demo_1667 | C1CCC2NNCC2C1 | RefCore21 | c1ccc2c(c1)CN=N2 | 0.0286 |
| JOB05 | Reinforcement_learning_DockStream_demo_1672 | C1C[C@H]2C[NH2+]C[C@H]2CN1 | RefCore9 | c1ccc2[nH]cnc2c1 | 0.0556 |
| JOB05 | Reinforcement_learning_DockStream_demo_1680 | C1CNC2NCCC2C1 | RefCore25 | c1cc2nc[nH]c2cn1 | 0.0588 |
| JOB05 | Reinforcement_learning_DockStream_demo_1685 | C1CCC2NNCC2C1 | RefCore21 | c1ccc2c(c1)CN=N2 | 0.0286 |
| JOB05 | Reinforcement_learning_DockStream_demo_1693 | C1CNC2NCCC2C1 | RefCore25 | c1cc2nc[nH]c2cn1 | 0.0588 |
| JOB05 | Reinforcement_learning_DockStream_demo_1702 | C1CNC2NCCC2C1 | RefCore25 | c1cc2nc[nH]c2cn1 | 0.0588 |
| JOB05 | Reinforcement_learning_DockStream_demo_1706 | C1CCC2NNCC2C1 | RefCore21 | c1ccc2c(c1)CN=N2 | 0.0286 |
| JOB05 | Reinforcement_learning_DockStream_demo_1708 | C1CNC2NNNC2C1 | RefCore21 | c1ccc2c(c1)CN=N2 | 0.0270 |
| JOB05 | Reinforcement_learning_DockStream_demo_1709 | C1CNC2NCCC2C1 | RefCore25 | c1cc2nc[nH]c2cn1 | 0.0588 |
| JOB05 | Reinforcement_learning_DockStream_demo_171 | c1ccn2nc3c(c2c1)CCCN3 | RefCore10 | C1=Nc2nccnc2C1 | 0.3158 |
| JOB05 | Reinforcement_learning_DockStream_demo_1712 | C1CNC2NCCC2C1 | RefCore25 | c1cc2nc[nH]c2cn1 | 0.0588 |
| JOB05 | Reinforcement_learning_DockStream_demo_1713 | C1CCC2NCCC2C1 | RefCore21 | c1ccc2c(c1)CN=N2 | 0.0294 |
| JOB05 | Reinforcement_learning_DockStream_demo_1718 | C1CNC2NCCC2C1 | RefCore25 | c1cc2nc[nH]c2cn1 | 0.0588 |
| JOB05 | Reinforcement_learning_DockStream_demo_172 | c1ccn2nc3c(c2c1)CCCNC3 | RefCore10 | C1=Nc2nccnc2C1 | 0.2683 |
| JOB05 | Reinforcement_learning_DockStream_demo_1728 | C1CNC2NCCC2C1 | RefCore25 | c1cc2nc[nH]c2cn1 | 0.0588 |
| JOB05 | Reinforcement_learning_DockStream_demo_1741 | C1CCC2NNCC2C1 | RefCore21 | c1ccc2c(c1)CN=N2 | 0.0286 |
| JOB05 | Reinforcement_learning_DockStream_demo_1748 | c1cnc2cncnc2c1 | RefCore48 | c1ccn2nccc2c1 | 0.4615 |
| JOB05 | Reinforcement_learning_DockStream_demo_1749 | c1ccn2nc3c(c2c1)CCNC3 | RefCore10 | C1=Nc2nccnc2C1 | 0.2821 |
| JOB05 | Reinforcement_learning_DockStream_demo_1750 | C1CCC2NNCC2C1 | RefCore21 | c1ccc2c(c1)CN=N2 | 0.0286 |
| JOB05 | Reinforcement_learning_DockStream_demo_1751 | C1CNC2NCCC2C1 | RefCore25 | c1cc2nc[nH]c2cn1 | 0.0588 |
| JOB05 | Reinforcement_learning_DockStream_demo_1756 | C1CNC2NCCC2C1 | RefCore25 | c1cc2nc[nH]c2cn1 | 0.0588 |
| JOB05 | Reinforcement_learning_DockStream_demo_176 | c1ccn2nc3c(c2c1)CCCNC3 | RefCore10 | C1=Nc2nccnc2C1 | 0.2683 |
| JOB05 | Reinforcement_learning_DockStream_demo_1763 | c1ccn2cc[nH+]c2c1 | RefCore31 | c1ccc2c(c1)CN=N2 | 0.3333 |
| JOB05 | Reinforcement_learning_DockStream_demo_1764 | C1CNC2NCCC2C1 | RefCore25 | c1cc2nc[nH]c2cn1 | 0.0588 |
| JOB05 | Reinforcement_learning_DockStream_demo_1771 | C1CNC2NCCC2C1 | RefCore25 | c1cc2nc[nH]c2cn1 | 0.0588 |
| JOB05 | Reinforcement_learning_DockStream_demo_1783 | C1CCC2NNCC2C1 | RefCore21 | c1ccc2c(c1)CN=N2 | 0.0286 |
| JOB05 | Reinforcement_learning_DockStream_demo_179 | c1ccc2ncncc2c1 | RefCore48 | c1ccn2nccc2c1 | 0.4800 |
| JOB05 | Reinforcement_learning_DockStream_demo_1790 | C1CNC2NCCC2C1 | RefCore25 | c1cc2nc[nH]c2cn1 | 0.0588 |
| JOB05 | Reinforcement_learning_DockStream_demo_1793 | C1CNC2NCCC2C1 | RefCore25 | c1cc2nc[nH]c2cn1 | 0.0588 |
| JOB05 | Reinforcement_learning_DockStream_demo_1796 | C1CNC2NCCC2C1 | RefCore25 | c1cc2nc[nH]c2cn1 | 0.0588 |
| JOB05 | Reinforcement_learning_DockStream_demo_1798 | C1CNC2NCCC2C1 | RefCore25 | c1cc2nc[nH]c2cn1 | 0.0588 |
| JOB05 | Reinforcement_learning_DockStream_demo_1815 | C1CCC2NNCC2C1 | RefCore21 | c1ccc2c(c1)CN=N2 | 0.0286 |
| JOB05 | Reinforcement_learning_DockStream_demo_1816 | C1CCC2NCCC2C1 | RefCore21 | c1ccc2c(c1)CN=N2 | 0.0294 |
| JOB05 | Reinforcement_learning_DockStream_demo_1823 | C1CNC2NCCC2C1 | RefCore25 | c1cc2nc[nH]c2cn1 | 0.0588 |
| JOB05 | Reinforcement_learning_DockStream_demo_1824 | C1CNC2NCCC2C1 | RefCore25 | c1cc2nc[nH]c2cn1 | 0.0588 |
| JOB05 | Reinforcement_learning_DockStream_demo_1825 | C1CNC2NCCC2C1 | RefCore25 | c1cc2nc[nH]c2cn1 | 0.0588 |
| JOB05 | Reinforcement_learning_DockStream_demo_1826 | c1ccn2cccc2c1 | RefCore10 | C1=Nc2nccnc2C1 | 0.4167 |
| JOB05 | Reinforcement_learning_DockStream_demo_1827 | C1CNC2NCCC2C1 | RefCore25 | c1cc2nc[nH]c2cn1 | 0.0588 |
| JOB05 | Reinforcement_learning_DockStream_demo_1832 | C1CNC2NCCC2C1 | RefCore25 | c1cc2nc[nH]c2cn1 | 0.0588 |
| JOB05 | Reinforcement_learning_DockStream_demo_1836 | C1CCC2NNCC2C1 | RefCore21 | c1ccc2c(c1)CN=N2 | 0.0286 |
| JOB05 | Reinforcement_learning_DockStream_demo_1846 | C1CNC2NCCC2C1 | RefCore25 | c1cc2nc[nH]c2cn1 | 0.0588 |
| JOB05 | Reinforcement_learning_DockStream_demo_1853 | C1CNC2NCCC2C1 | RefCore25 | c1cc2nc[nH]c2cn1 | 0.0588 |
| JOB05 | Reinforcement_learning_DockStream_demo_1854 | C1CCC2NNCC2C1 | RefCore21 | c1ccc2c(c1)CN=N2 | 0.0286 |
| JOB05 | Reinforcement_learning_DockStream_demo_1856 | C1CNC2NCCC2C1 | RefCore25 | c1cc2nc[nH]c2cn1 | 0.0588 |
| JOB05 | Reinforcement_learning_DockStream_demo_1857 | C1CCC2OCCCC2C1 | RefCore37 | C1=Cc2ccccc2[N]1 | 0.0606 |
| JOB05 | Reinforcement_learning_DockStream_demo_1858 | C1CNC2NCCC2C1 | RefCore25 | c1cc2nc[nH]c2cn1 | 0.0588 |
| JOB05 | Reinforcement_learning_DockStream_demo_186 | c1ccn2nc3c(c2c1)CCCNC3 | RefCore10 | C1=Nc2nccnc2C1 | 0.2683 |
| JOB05 | Reinforcement_learning_DockStream_demo_1860 | C1CNC2NCCC2C1 | RefCore25 | c1cc2nc[nH]c2cn1 | 0.0588 |
| JOB05 | Reinforcement_learning_DockStream_demo_1867 | C1CNC2NCCC2C1 | RefCore25 | c1cc2nc[nH]c2cn1 | 0.0588 |
| JOB05 | Reinforcement_learning_DockStream_demo_187 | c1ccn2nc3c(c2c1)CC[NH+]1CCCC[C@@H]1C3 | RefCore10 | C1=Nc2nccnc2C1 | 0.2553 |
| JOB05 | Reinforcement_learning_DockStream_demo_1873 | C1CNC2NCCC2C1 | RefCore25 | c1cc2nc[nH]c2cn1 | 0.0588 |
| JOB05 | Reinforcement_learning_DockStream_demo_1876 | C1CCC2NNCC2C1 | RefCore21 | c1ccc2c(c1)CN=N2 | 0.0286 |
| JOB05 | Reinforcement_learning_DockStream_demo_1885 | C1CNC2NCCC2C1 | RefCore25 | c1cc2nc[nH]c2cn1 | 0.0588 |
| JOB05 | Reinforcement_learning_DockStream_demo_1889 | c1cn2ccoc2n1 | RefCore44 | c1ccn2ncnc2c1 | 0.3448 |
| JOB05 | Reinforcement_learning_DockStream_demo_189 | c1ccn2nc3c(c2c1)CCCNC3 | RefCore10 | C1=Nc2nccnc2C1 | 0.2683 |
| JOB05 | Reinforcement_learning_DockStream_demo_1894 | C1CCC2NNCC2C1 | RefCore21 | c1ccc2c(c1)CN=N2 | 0.0286 |
| JOB05 | Reinforcement_learning_DockStream_demo_1895 | c1ccc2ccccc2c1 | RefCore48 | c1ccn2nccc2c1 | 0.3889 |
| JOB05 | Reinforcement_learning_DockStream_demo_1898 | C1CNC2NCCC2C1 | RefCore25 | c1cc2nc[nH]c2cn1 | 0.0588 |
| JOB05 | Reinforcement_learning_DockStream_demo_1903 | C1CNC2NCCC2C1 | RefCore25 | c1cc2nc[nH]c2cn1 | 0.0588 |
| JOB05 | Reinforcement_learning_DockStream_demo_1909 | C1CNC2NCCC2C1 | RefCore25 | c1cc2nc[nH]c2cn1 | 0.0588 |
| JOB05 | Reinforcement_learning_DockStream_demo_1917 | C1CNC2NCCC2C1 | RefCore25 | c1cc2nc[nH]c2cn1 | 0.0588 |
| JOB05 | Reinforcement_learning_DockStream_demo_1920 | C1CNC2NCCC2C1 | RefCore25 | c1cc2nc[nH]c2cn1 | 0.0588 |
| JOB05 | Reinforcement_learning_DockStream_demo_1926 | C1CCC2NNCC2C1 | RefCore21 | c1ccc2c(c1)CN=N2 | 0.0286 |
| JOB05 | Reinforcement_learning_DockStream_demo_1929 | C1CCC2NCNC2C1 | RefCore37 | C1=Cc2ccccc2[N]1 | 0.0690 |
| JOB05 | Reinforcement_learning_DockStream_demo_1933 | C1CNC2NCCC2C1 | RefCore25 | c1cc2nc[nH]c2cn1 | 0.0588 |
| JOB05 | Reinforcement_learning_DockStream_demo_1944 | C1CCC2NNCC2C1 | RefCore21 | c1ccc2c(c1)CN=N2 | 0.0286 |
| JOB05 | Reinforcement_learning_DockStream_demo_1948 | c1ccc2c(c1)CNC2 | RefCore6 | C1=Nc2ncccc2C1 | 0.3200 |
| JOB05 | Reinforcement_learning_DockStream_demo_1953 | c1ccn2cc[nH+]c2c1 | RefCore31 | c1ccc2c(c1)CN=N2 | 0.3333 |
| JOB05 | Reinforcement_learning_DockStream_demo_1963 | c1ccc2ccccc2c1 | RefCore48 | c1ccn2nccc2c1 | 0.3889 |
| JOB05 | Reinforcement_learning_DockStream_demo_1965 | C1CNC2NCCC2C1 | RefCore25 | c1cc2nc[nH]c2cn1 | 0.0588 |
| JOB05 | Reinforcement_learning_DockStream_demo_1967 | C1CCC2NNCC2C1 | RefCore21 | c1ccc2c(c1)CN=N2 | 0.0286 |
| JOB05 | Reinforcement_learning_DockStream_demo_197 | c1ccn2nc3c(c2c1)CCCNC3 | RefCore10 | C1=Nc2nccnc2C1 | 0.2683 |
| JOB05 | Reinforcement_learning_DockStream_demo_1973 | C1CCC2NNCC2C1 | RefCore21 | c1ccc2c(c1)CN=N2 | 0.0286 |
| JOB05 | Reinforcement_learning_DockStream_demo_1981 | C1CNC2NCCC2C1 | RefCore25 | c1cc2nc[nH]c2cn1 | 0.0588 |
| JOB05 | Reinforcement_learning_DockStream_demo_1987 | C1CCC2NCCC2C1 | RefCore21 | c1ccc2c(c1)CN=N2 | 0.0294 |
| JOB05 | Reinforcement_learning_DockStream_demo_1988 | C1CCC2NNCC2C1 | RefCore21 | c1ccc2c(c1)CN=N2 | 0.0286 |
| JOB05 | Reinforcement_learning_DockStream_demo_1991 | C1CCC2NNCC2C1 | RefCore21 | c1ccc2c(c1)CN=N2 | 0.0286 |
| JOB05 | Reinforcement_learning_DockStream_demo_1992 | C1CNC2NCCC2C1 | RefCore25 | c1cc2nc[nH]c2cn1 | 0.0588 |
| JOB05 | Reinforcement_learning_DockStream_demo_1995 | C1CCC2NNCC2C1 | RefCore21 | c1ccc2c(c1)CN=N2 | 0.0286 |
| JOB05 | Reinforcement_learning_DockStream_demo_1998 | C1CNC2NCCC2C1 | RefCore25 | c1cc2nc[nH]c2cn1 | 0.0588 |
| JOB05 | Reinforcement_learning_DockStream_demo_1999 | C1CCC2NNCC2C1 | RefCore21 | c1ccc2c(c1)CN=N2 | 0.0286 |
| JOB05 | Reinforcement_learning_DockStream_demo_2000 | C1CNC2NCCC2C1 | RefCore25 | c1cc2nc[nH]c2cn1 | 0.0588 |
| JOB05 | Reinforcement_learning_DockStream_demo_2011 | C1C[C@H]2C[C@H](C2)[NH2+]1 | RefCore37 | C1=Cc2ccccc2[N]1 | 0.0313 |
| JOB05 | Reinforcement_learning_DockStream_demo_2014 | C1CNC2NCCC2C1 | RefCore25 | c1cc2nc[nH]c2cn1 | 0.0588 |
| JOB05 | Reinforcement_learning_DockStream_demo_2018 | C1CNC2NCCC2C1 | RefCore25 | c1cc2nc[nH]c2cn1 | 0.0588 |
| JOB05 | Reinforcement_learning_DockStream_demo_2023 | C1CNC2NCCC2C1 | RefCore25 | c1cc2nc[nH]c2cn1 | 0.0588 |
| JOB05 | Reinforcement_learning_DockStream_demo_203 | c1ccn2nc3c(c2c1)CC[NH+]1CCCC[C@@H]1C3 | RefCore10 | C1=Nc2nccnc2C1 | 0.2553 |
| JOB05 | Reinforcement_learning_DockStream_demo_2038 | C1CNC2NCCC2C1 | RefCore25 | c1cc2nc[nH]c2cn1 | 0.0588 |
| JOB05 | Reinforcement_learning_DockStream_demo_204 | c1ccn2nc3c(c2c1)CCCNC3 | RefCore10 | C1=Nc2nccnc2C1 | 0.2683 |
| JOB05 | Reinforcement_learning_DockStream_demo_2041 | c1ccc2occc2c1 | RefCore32 | C1=NCc2ccccc21 | 0.3000 |
| JOB05 | Reinforcement_learning_DockStream_demo_2052 | c1ccc2ncncc2c1 | RefCore48 | c1ccn2nccc2c1 | 0.4800 |
| JOB05 | Reinforcement_learning_DockStream_demo_2053 | C1CNC2NCCC2C1 | RefCore25 | c1cc2nc[nH]c2cn1 | 0.0588 |
| JOB05 | Reinforcement_learning_DockStream_demo_206 | c1ccn2nc3c(c2c1)CC[NH2+][C@H]1CCCO[C@H]31 | RefCore10 | C1=Nc2nccnc2C1 | 0.2766 |
| JOB05 | Reinforcement_learning_DockStream_demo_2061 | C1CNC2NCCC2C1 | RefCore25 | c1cc2nc[nH]c2cn1 | 0.0588 |
| JOB05 | Reinforcement_learning_DockStream_demo_2063 | C1CNC2NCCC2C1 | RefCore25 | c1cc2nc[nH]c2cn1 | 0.0588 |
| JOB05 | Reinforcement_learning_DockStream_demo_207 | c1ccc2ncncc2c1 | RefCore48 | c1ccn2nccc2c1 | 0.4800 |
| JOB05 | Reinforcement_learning_DockStream_demo_2072 | C1CNC2NCCC2C1 | RefCore25 | c1cc2nc[nH]c2cn1 | 0.0588 |
| JOB05 | Reinforcement_learning_DockStream_demo_2079 | c1ccc2ocnc2c1 | RefCore48 | c1ccn2nccc2c1 | 0.3333 |
| JOB05 | Reinforcement_learning_DockStream_demo_2082 | c1cnc2ccncc2c1 | RefCore48 | c1ccn2nccc2c1 | 0.5833 |
| JOB05 | Reinforcement_learning_DockStream_demo_2087 | C1CCC2NNCC2C1 | RefCore21 | c1ccc2c(c1)CN=N2 | 0.0286 |
| JOB05 | Reinforcement_learning_DockStream_demo_2091 | C1CCC2NNCC2C1 | RefCore21 | c1ccc2c(c1)CN=N2 | 0.0286 |
| JOB05 | Reinforcement_learning_DockStream_demo_2094 | C1CNC2NCCC2C1 | RefCore25 | c1cc2nc[nH]c2cn1 | 0.0588 |
| JOB05 | Reinforcement_learning_DockStream_demo_2095 | C1CNC2NCCC2C1 | RefCore25 | c1cc2nc[nH]c2cn1 | 0.0588 |
| JOB05 | Reinforcement_learning_DockStream_demo_2098 | C1CNC2NCCC2C1 | RefCore25 | c1cc2nc[nH]c2cn1 | 0.0588 |
| JOB05 | Reinforcement_learning_DockStream_demo_2110 | c1cnc2nccn2c1 | RefCore31 | c1ccc2c(c1)CN=N2 | 0.4615 |
| JOB05 | Reinforcement_learning_DockStream_demo_2114 | C1CNC2NCCC2C1 | RefCore25 | c1cc2nc[nH]c2cn1 | 0.0588 |
| JOB05 | Reinforcement_learning_DockStream_demo_2115 | C1CNC2NCCC2C1 | RefCore25 | c1cc2nc[nH]c2cn1 | 0.0588 |
| JOB05 | Reinforcement_learning_DockStream_demo_2120 | C1CNC2NCCC2C1 | RefCore25 | c1cc2nc[nH]c2cn1 | 0.0588 |
| JOB05 | Reinforcement_learning_DockStream_demo_2137 | c1cc2cnccn2c1 | RefCore13 | C1=Nc2ncccc2C1 | 0.5385 |
| JOB05 | Reinforcement_learning_DockStream_demo_2138 | c1cnc2c(c1)CNCC2 | RefCore5 | c1cc2cncnn2c1 | 0.3429 |
| JOB05 | Reinforcement_learning_DockStream_demo_2147 | C1CNC2NCCC2C1 | RefCore25 | c1cc2nc[nH]c2cn1 | 0.0588 |
| JOB05 | Reinforcement_learning_DockStream_demo_2152 | C1CNC2NNCC2C1 | RefCore21 | c1ccc2c(c1)CN=N2 | 0.0263 |
| JOB05 | Reinforcement_learning_DockStream_demo_2158 | C1CNC2NCCC2C1 | RefCore25 | c1cc2nc[nH]c2cn1 | 0.0588 |
| JOB05 | Reinforcement_learning_DockStream_demo_2159 | C1CNC2NCCC2C1 | RefCore25 | c1cc2nc[nH]c2cn1 | 0.0588 |
| JOB05 | Reinforcement_learning_DockStream_demo_2178 | C1CNC2NCCC2C1 | RefCore25 | c1cc2nc[nH]c2cn1 | 0.0588 |
| JOB05 | Reinforcement_learning_DockStream_demo_2188 | C1CNC2NCCC2C1 | RefCore25 | c1cc2nc[nH]c2cn1 | 0.0588 |
| JOB05 | Reinforcement_learning_DockStream_demo_219 | c1ccc2ncncc2c1 | RefCore48 | c1ccn2nccc2c1 | 0.4800 |
| JOB05 | Reinforcement_learning_DockStream_demo_2191 | C1CNC2NCCC2C1 | RefCore25 | c1cc2nc[nH]c2cn1 | 0.0588 |
| JOB05 | Reinforcement_learning_DockStream_demo_2193 | C1CNC2NCCC2C1 | RefCore25 | c1cc2nc[nH]c2cn1 | 0.0588 |
| JOB05 | Reinforcement_learning_DockStream_demo_2194 | C1CCC2NNCC2C1 | RefCore21 | c1ccc2c(c1)CN=N2 | 0.0286 |
| JOB05 | Reinforcement_learning_DockStream_demo_2196 | C1CCC2NNCC2C1 | RefCore21 | c1ccc2c(c1)CN=N2 | 0.0286 |
| JOB05 | Reinforcement_learning_DockStream_demo_2198 | c1ccc2c(c1)CC1CNNC21 | RefCore6 | C1=Nc2ncccc2C1 | 0.2162 |
| JOB05 | Reinforcement_learning_DockStream_demo_220 | C1CCC2NNCC2C1 | RefCore21 | c1ccc2c(c1)CN=N2 | 0.0286 |
| JOB05 | Reinforcement_learning_DockStream_demo_2200 | C1CNC2NCCC2C1 | RefCore25 | c1cc2nc[nH]c2cn1 | 0.0588 |
| JOB05 | Reinforcement_learning_DockStream_demo_2204 | C1CCC2NNCC2C1 | RefCore21 | c1ccc2c(c1)CN=N2 | 0.0286 |
| JOB05 | Reinforcement_learning_DockStream_demo_221 | c1ccn2nc3c(c2c1)CCCNC3 | RefCore10 | C1=Nc2nccnc2C1 | 0.2683 |
| JOB05 | Reinforcement_learning_DockStream_demo_2212 | C1N[C@H]2C[C@@H]1C2 | RefCore37 | C1=Cc2ccccc2[N]1 | 0.0690 |
| JOB05 | Reinforcement_learning_DockStream_demo_2217 | C1CCC2OCCCC2C1 | RefCore37 | C1=Cc2ccccc2[N]1 | 0.0606 |
| JOB05 | Reinforcement_learning_DockStream_demo_2218 | C1CNC2NCCC2C1 | RefCore25 | c1cc2nc[nH]c2cn1 | 0.0588 |
| JOB05 | Reinforcement_learning_DockStream_demo_2220 | C1CNC2NCCC2C1 | RefCore25 | c1cc2nc[nH]c2cn1 | 0.0588 |
| JOB05 | Reinforcement_learning_DockStream_demo_2225 | C1CNC2NCCC2C1 | RefCore25 | c1cc2nc[nH]c2cn1 | 0.0588 |
| JOB05 | Reinforcement_learning_DockStream_demo_2236 | C1CNC2NCCC2C1 | RefCore25 | c1cc2nc[nH]c2cn1 | 0.0588 |
| JOB05 | Reinforcement_learning_DockStream_demo_2258 | c1ccc2cnccc2c1 | RefCore2 | c1ncc2cn[nH]c2n1 | 0.4074 |
| JOB05 | Reinforcement_learning_DockStream_demo_2261 | C1CNC2NCCC2C1 | RefCore25 | c1cc2nc[nH]c2cn1 | 0.0588 |
| JOB05 | Reinforcement_learning_DockStream_demo_2262 | C1CNC2NCCC2C1 | RefCore25 | c1cc2nc[nH]c2cn1 | 0.0588 |
| JOB05 | Reinforcement_learning_DockStream_demo_2266 | C1CNC2NNCC2C1 | RefCore21 | c1ccc2c(c1)CN=N2 | 0.0263 |
| JOB05 | Reinforcement_learning_DockStream_demo_2268 | c1ccc2cnccc2c1 | RefCore2 | c1ncc2cn[nH]c2n1 | 0.4074 |
| JOB05 | Reinforcement_learning_DockStream_demo_2269 | C1CNC2NCCC2C1 | RefCore25 | c1cc2nc[nH]c2cn1 | 0.0588 |
| JOB05 | Reinforcement_learning_DockStream_demo_2272 | C1CNC2NCCC2C1 | RefCore25 | c1cc2nc[nH]c2cn1 | 0.0588 |
| JOB05 | Reinforcement_learning_DockStream_demo_2280 | C1CCC2NNCC2C1 | RefCore21 | c1ccc2c(c1)CN=N2 | 0.0286 |
| JOB05 | Reinforcement_learning_DockStream_demo_2282 | C1C[C@@H]2C[C@@H]2CN1 | RefCore21 | c1ccc2c(c1)CN=N2 | 0.0303 |
| JOB05 | Reinforcement_learning_DockStream_demo_2287 | C1CNC2NCCC2C1 | RefCore25 | c1cc2nc[nH]c2cn1 | 0.0588 |
| JOB05 | Reinforcement_learning_DockStream_demo_2289 | C1CNC2NCCC2C1 | RefCore25 | c1cc2nc[nH]c2cn1 | 0.0588 |
| JOB05 | Reinforcement_learning_DockStream_demo_229 | c1ccn2nc3c(c2c1)CCCNC3 | RefCore10 | C1=Nc2nccnc2C1 | 0.2683 |
| JOB05 | Reinforcement_learning_DockStream_demo_2290 | C1CNC2NCCC2C1 | RefCore25 | c1cc2nc[nH]c2cn1 | 0.0588 |
| JOB05 | Reinforcement_learning_DockStream_demo_2292 | C1CNC2CNNC2C1 | RefCore9 | c1ccc2[nH]cnc2c1 | 0.0541 |
| JOB05 | Reinforcement_learning_DockStream_demo_2295 | C1CCC2NNCC2C1 | RefCore21 | c1ccc2c(c1)CN=N2 | 0.0286 |
| JOB05 | Reinforcement_learning_DockStream_demo_2299 | c1ccn2nc3c(c2c1)CCCNC3 | RefCore10 | C1=Nc2nccnc2C1 | 0.2683 |
| JOB05 | Reinforcement_learning_DockStream_demo_2316 | C1CNC2NCCC2C1 | RefCore25 | c1cc2nc[nH]c2cn1 | 0.0588 |
| JOB05 | Reinforcement_learning_DockStream_demo_2319 | C1CCC2NNCC2C1 | RefCore21 | c1ccc2c(c1)CN=N2 | 0.0286 |
| JOB05 | Reinforcement_learning_DockStream_demo_232 | c1ccn2nc3c(c2c1)CCCNC3 | RefCore10 | C1=Nc2nccnc2C1 | 0.2683 |
| JOB05 | Reinforcement_learning_DockStream_demo_2326 | C1CCC2NNCC2C1 | RefCore21 | c1ccc2c(c1)CN=N2 | 0.0286 |
| JOB05 | Reinforcement_learning_DockStream_demo_2329 | C1CNC2NCCC2C1 | RefCore25 | c1cc2nc[nH]c2cn1 | 0.0588 |
| JOB05 | Reinforcement_learning_DockStream_demo_2333 | C1C[C@H]2CNC[C@@H]1[NH2+]2 | RefCore45 | c1cnn2cnnc2c1 | 0.0645 |
| JOB05 | Reinforcement_learning_DockStream_demo_2334 | C1CNC2NNCC2C1 | RefCore21 | c1ccc2c(c1)CN=N2 | 0.0263 |
| JOB05 | Reinforcement_learning_DockStream_demo_2338 | C1CNC2NCCC2C1 | RefCore25 | c1cc2nc[nH]c2cn1 | 0.0588 |
| JOB05 | Reinforcement_learning_DockStream_demo_2342 | C1CNC2NNCC2C1 | RefCore21 | c1ccc2c(c1)CN=N2 | 0.0263 |
| JOB05 | Reinforcement_learning_DockStream_demo_2350 | C1CNC2NCCC2C1 | RefCore25 | c1cc2nc[nH]c2cn1 | 0.0588 |
| JOB05 | Reinforcement_learning_DockStream_demo_2363 | C1CCC2NNCC2C1 | RefCore21 | c1ccc2c(c1)CN=N2 | 0.0286 |
| JOB05 | Reinforcement_learning_DockStream_demo_2364 | c1ccc2cnccc2c1 | RefCore2 | c1ncc2cn[nH]c2n1 | 0.4074 |
| JOB05 | Reinforcement_learning_DockStream_demo_2374 | C1CNC2NCCC2C1 | RefCore25 | c1cc2nc[nH]c2cn1 | 0.0588 |
| JOB05 | Reinforcement_learning_DockStream_demo_238 | c1ccn2nc3c(c2c1)CC[NH2+][C@H]1CCC[C@H]31 | RefCore10 | C1=Nc2nccnc2C1 | 0.2609 |
| JOB05 | Reinforcement_learning_DockStream_demo_2386 | c1ccc2ccccc2c1 | RefCore48 | c1ccn2nccc2c1 | 0.3889 |
| JOB05 | Reinforcement_learning_DockStream_demo_239 | c1ccn2nc3c(c2c1)CCCNC3 | RefCore10 | C1=Nc2nccnc2C1 | 0.2683 |
| JOB05 | Reinforcement_learning_DockStream_demo_2393 | C1CCC2NNCC2C1 | RefCore21 | c1ccc2c(c1)CN=N2 | 0.0286 |
| JOB05 | Reinforcement_learning_DockStream_demo_2395 | C1CNC2NCCC2C1 | RefCore25 | c1cc2nc[nH]c2cn1 | 0.0588 |
| JOB05 | Reinforcement_learning_DockStream_demo_2397 | C1CNC2NCCC2C1 | RefCore25 | c1cc2nc[nH]c2cn1 | 0.0588 |
| JOB05 | Reinforcement_learning_DockStream_demo_2399 | C1CNC2NCCC2C1 | RefCore25 | c1cc2nc[nH]c2cn1 | 0.0588 |
| JOB05 | Reinforcement_learning_DockStream_demo_2404 | C1CNC2NCCC2C1 | RefCore25 | c1cc2nc[nH]c2cn1 | 0.0588 |
| JOB05 | Reinforcement_learning_DockStream_demo_2405 | C1CNC2NCCC2C1 | RefCore25 | c1cc2nc[nH]c2cn1 | 0.0588 |
| JOB05 | Reinforcement_learning_DockStream_demo_2406 | C1CNC2NCCC2C1 | RefCore25 | c1cc2nc[nH]c2cn1 | 0.0588 |
| JOB05 | Reinforcement_learning_DockStream_demo_2407 | C1CNC2NCCC2C1 | RefCore25 | c1cc2nc[nH]c2cn1 | 0.0588 |
| JOB05 | Reinforcement_learning_DockStream_demo_2408 | C1CNC2NCCC2C1 | RefCore25 | c1cc2nc[nH]c2cn1 | 0.0588 |
| JOB05 | Reinforcement_learning_DockStream_demo_2409 | C1CNC2NCCC2C1 | RefCore25 | c1cc2nc[nH]c2cn1 | 0.0588 |
| JOB05 | Reinforcement_learning_DockStream_demo_2413 | C1CCC2OCCCC2C1 | RefCore37 | C1=Cc2ccccc2[N]1 | 0.0606 |
| JOB05 | Reinforcement_learning_DockStream_demo_2415 | C1CNC2NCCC2C1 | RefCore25 | c1cc2nc[nH]c2cn1 | 0.0588 |
| JOB05 | Reinforcement_learning_DockStream_demo_2422 | C1CNC2NCCC2C1 | RefCore25 | c1cc2nc[nH]c2cn1 | 0.0588 |
| JOB05 | Reinforcement_learning_DockStream_demo_2425 | C1CCC2NNCC2C1 | RefCore21 | c1ccc2c(c1)CN=N2 | 0.0286 |
| JOB05 | Reinforcement_learning_DockStream_demo_2433 | C1CNC2NNCC2C1 | RefCore21 | c1ccc2c(c1)CN=N2 | 0.0263 |
| JOB05 | Reinforcement_learning_DockStream_demo_2434 | C1CNC2NCCC2C1 | RefCore25 | c1cc2nc[nH]c2cn1 | 0.0588 |
| JOB05 | Reinforcement_learning_DockStream_demo_2436 | C1CCC2NNCC2C1 | RefCore21 | c1ccc2c(c1)CN=N2 | 0.0286 |
| JOB05 | Reinforcement_learning_DockStream_demo_2439 | C1CCC2NNCC2C1 | RefCore21 | c1ccc2c(c1)CN=N2 | 0.0286 |
| JOB05 | Reinforcement_learning_DockStream_demo_2440 | C1CNC2NCCC2C1 | RefCore25 | c1cc2nc[nH]c2cn1 | 0.0588 |
| JOB05 | Reinforcement_learning_DockStream_demo_2441 | C1CNC2NCCC2C1 | RefCore25 | c1cc2nc[nH]c2cn1 | 0.0588 |
| JOB05 | Reinforcement_learning_DockStream_demo_2443 | C1CNC2NCCC2C1 | RefCore25 | c1cc2nc[nH]c2cn1 | 0.0588 |
| JOB05 | Reinforcement_learning_DockStream_demo_2450 | C1CNC2NCCC2C1 | RefCore25 | c1cc2nc[nH]c2cn1 | 0.0588 |
| JOB05 | Reinforcement_learning_DockStream_demo_2454 | C1CNC2NCCC2C1 | RefCore25 | c1cc2nc[nH]c2cn1 | 0.0588 |
| JOB05 | Reinforcement_learning_DockStream_demo_2455 | C1CNC2NCCC2C1 | RefCore25 | c1cc2nc[nH]c2cn1 | 0.0588 |
| JOB05 | Reinforcement_learning_DockStream_demo_246 | c1ccn2nc3c(c2c1)CCCNC3 | RefCore10 | C1=Nc2nccnc2C1 | 0.2683 |
| JOB05 | Reinforcement_learning_DockStream_demo_2462 | C1CNC2NCCC2C1 | RefCore25 | c1cc2nc[nH]c2cn1 | 0.0588 |
| JOB05 | Reinforcement_learning_DockStream_demo_2463 | C1CNC2NCCC2C1 | RefCore25 | c1cc2nc[nH]c2cn1 | 0.0588 |
| JOB05 | Reinforcement_learning_DockStream_demo_2464 | c1cnc2cccnc2c1 | RefCore48 | c1ccn2nccc2c1 | 0.6667 |
| JOB05 | Reinforcement_learning_DockStream_demo_2469 | C1CNC2NCCC2C1 | RefCore25 | c1cc2nc[nH]c2cn1 | 0.0588 |
| JOB05 | Reinforcement_learning_DockStream_demo_2470 | C1CNC2NCCC2C1 | RefCore25 | c1cc2nc[nH]c2cn1 | 0.0588 |
| JOB05 | Reinforcement_learning_DockStream_demo_2474 | C1CNC2NCCC2C1 | RefCore25 | c1cc2nc[nH]c2cn1 | 0.0588 |
| JOB05 | Reinforcement_learning_DockStream_demo_2476 | C1CNC2NCCC2C1 | RefCore25 | c1cc2nc[nH]c2cn1 | 0.0588 |
| JOB05 | Reinforcement_learning_DockStream_demo_2479 | C1C[C@@H]2OCC[C@@H]2CN1 | RefCore37 | C1=Cc2ccccc2[N]1 | 0.0556 |
| JOB05 | Reinforcement_learning_DockStream_demo_2480 | C1CCC2NNCC2C1 | RefCore21 | c1ccc2c(c1)CN=N2 | 0.0286 |
| JOB05 | Reinforcement_learning_DockStream_demo_2483 | C1CNC2NCCC2C1 | RefCore25 | c1cc2nc[nH]c2cn1 | 0.0588 |
| JOB05 | Reinforcement_learning_DockStream_demo_2488 | C1CNC2NCCC2C1 | RefCore25 | c1cc2nc[nH]c2cn1 | 0.0588 |
| JOB05 | Reinforcement_learning_DockStream_demo_2494 | C1CC2NNCC2CN1 | RefCore21 | c1ccc2c(c1)CN=N2 | 0.0270 |
| JOB05 | Reinforcement_learning_DockStream_demo_2495 | C1CNC2NCCC2C1 | RefCore25 | c1cc2nc[nH]c2cn1 | 0.0588 |
| JOB05 | Reinforcement_learning_DockStream_demo_2496 | C1CNC2NNCC2C1 | RefCore21 | c1ccc2c(c1)CN=N2 | 0.0263 |
| JOB05 | Reinforcement_learning_DockStream_demo_2499 | C1CNC2NCCC2C1 | RefCore25 | c1cc2nc[nH]c2cn1 | 0.0588 |
| JOB05 | Reinforcement_learning_DockStream_demo_2500 | C1CNC2NCCC2C1 | RefCore25 | c1cc2nc[nH]c2cn1 | 0.0588 |
| JOB05 | Reinforcement_learning_DockStream_demo_2501 | C1CNC2NCCC2C1 | RefCore25 | c1cc2nc[nH]c2cn1 | 0.0588 |
| JOB05 | Reinforcement_learning_DockStream_demo_2502 | c1ccc2ncncc2c1 | RefCore48 | c1ccn2nccc2c1 | 0.4800 |
| JOB05 | Reinforcement_learning_DockStream_demo_2503 | c1cnc2cc3c(cc2c1)C[NH2+]CCO3 | RefCore48 | c1ccn2nccc2c1 | 0.3333 |
| JOB05 | Reinforcement_learning_DockStream_demo_2505 | C1CNC2NCCC2C1 | RefCore25 | c1cc2nc[nH]c2cn1 | 0.0588 |
| JOB05 | Reinforcement_learning_DockStream_demo_2506 | C1C[C@H]2C[C@@H]2CN1 | RefCore21 | c1ccc2c(c1)CN=N2 | 0.0303 |
| JOB05 | Reinforcement_learning_DockStream_demo_2508 | c1ccc2ccccc2c1 | RefCore48 | c1ccn2nccc2c1 | 0.3889 |
| JOB05 | Reinforcement_learning_DockStream_demo_2509 | C1CCC2NNCC2C1 | RefCore21 | c1ccc2c(c1)CN=N2 | 0.0286 |
| JOB05 | Reinforcement_learning_DockStream_demo_2510 | C1CNC2NCCC2C1 | RefCore25 | c1cc2nc[nH]c2cn1 | 0.0588 |
| JOB05 | Reinforcement_learning_DockStream_demo_2518 | C1CNC2NCCC2C1 | RefCore25 | c1cc2nc[nH]c2cn1 | 0.0588 |
| JOB05 | Reinforcement_learning_DockStream_demo_252 | c1ccc2ncncc2c1 | RefCore48 | c1ccn2nccc2c1 | 0.4800 |
| JOB05 | Reinforcement_learning_DockStream_demo_2529 | C1CNC2NCCC2C1 | RefCore25 | c1cc2nc[nH]c2cn1 | 0.0588 |
| JOB05 | Reinforcement_learning_DockStream_demo_2535 | C1CNC2NCCC2C1 | RefCore25 | c1cc2nc[nH]c2cn1 | 0.0588 |
| JOB05 | Reinforcement_learning_DockStream_demo_2537 | C1CCC2NNCC2C1 | RefCore21 | c1ccc2c(c1)CN=N2 | 0.0286 |
| JOB05 | Reinforcement_learning_DockStream_demo_2538 | C1CNC2NCCC2C1 | RefCore25 | c1cc2nc[nH]c2cn1 | 0.0588 |
| JOB05 | Reinforcement_learning_DockStream_demo_2539 | C1CNC2NCCC2C1 | RefCore25 | c1cc2nc[nH]c2cn1 | 0.0588 |
| JOB05 | Reinforcement_learning_DockStream_demo_2540 | C1CNC2NCCC2C1 | RefCore25 | c1cc2nc[nH]c2cn1 | 0.0588 |
| JOB05 | Reinforcement_learning_DockStream_demo_2541 | C1CCC2OC3CCCCC3CC2C1 | RefCore37 | C1=Cc2ccccc2[N]1 | 0.0625 |
| JOB05 | Reinforcement_learning_DockStream_demo_2544 | C1CNC2NCCC2C1 | RefCore25 | c1cc2nc[nH]c2cn1 | 0.0588 |
| JOB05 | Reinforcement_learning_DockStream_demo_2545 | C1CNC2NCCC2C1 | RefCore25 | c1cc2nc[nH]c2cn1 | 0.0588 |
| JOB05 | Reinforcement_learning_DockStream_demo_2548 | C1CC2CNCNC2N1 | RefCore25 | c1cc2nc[nH]c2cn1 | 0.0541 |
| JOB05 | Reinforcement_learning_DockStream_demo_2554 | C1CNC2NCCC2C1 | RefCore25 | c1cc2nc[nH]c2cn1 | 0.0588 |
| JOB05 | Reinforcement_learning_DockStream_demo_2556 | C1CNC2NCCC2C1 | RefCore25 | c1cc2nc[nH]c2cn1 | 0.0588 |
| JOB05 | Reinforcement_learning_DockStream_demo_2558 | c1ccc2cnccc2c1 | RefCore2 | c1ncc2cn[nH]c2n1 | 0.4074 |
| JOB05 | Reinforcement_learning_DockStream_demo_2559 | C1CNC2NCCC2C1 | RefCore25 | c1cc2nc[nH]c2cn1 | 0.0588 |
| JOB05 | Reinforcement_learning_DockStream_demo_2561 | C1C[C@H]2C[C@@H]2CCN1 | RefCore21 | c1ccc2c(c1)CN=N2 | 0.0333 |
| JOB05 | Reinforcement_learning_DockStream_demo_2562 | C1C[C@H]2CO[C@@H]2CN1 | RefCore21 | c1ccc2c(c1)CN=N2 | 0.0556 |
| JOB05 | Reinforcement_learning_DockStream_demo_2564 | C1CNC2NCCC2C1 | RefCore25 | c1cc2nc[nH]c2cn1 | 0.0588 |
| JOB05 | Reinforcement_learning_DockStream_demo_2565 | C1CNC2NCCC2C1 | RefCore25 | c1cc2nc[nH]c2cn1 | 0.0588 |
| JOB05 | Reinforcement_learning_DockStream_demo_2568 | C1CNC2NCCC2C1 | RefCore25 | c1cc2nc[nH]c2cn1 | 0.0588 |
| JOB05 | Reinforcement_learning_DockStream_demo_2573 | C1CNC2NCCC2C1 | RefCore25 | c1cc2nc[nH]c2cn1 | 0.0588 |
| JOB05 | Reinforcement_learning_DockStream_demo_2576 | C1CNC2NCCC2C1 | RefCore25 | c1cc2nc[nH]c2cn1 | 0.0588 |
| JOB05 | Reinforcement_learning_DockStream_demo_2577 | C1CNC2NCCC2C1 | RefCore25 | c1cc2nc[nH]c2cn1 | 0.0588 |
| JOB05 | Reinforcement_learning_DockStream_demo_2578 | C1CNC2NCCC2C1 | RefCore25 | c1cc2nc[nH]c2cn1 | 0.0588 |
| JOB05 | Reinforcement_learning_DockStream_demo_2579 | C1CNC2NCCC2C1 | RefCore25 | c1cc2nc[nH]c2cn1 | 0.0588 |
| JOB05 | Reinforcement_learning_DockStream_demo_2583 | C1CNC2NCCC2C1 | RefCore25 | c1cc2nc[nH]c2cn1 | 0.0588 |
| JOB05 | Reinforcement_learning_DockStream_demo_2586 | C1CCC2NNCC2C1 | RefCore21 | c1ccc2c(c1)CN=N2 | 0.0286 |
| JOB05 | Reinforcement_learning_DockStream_demo_2588 | C1NC[C@H]2C[C@@H]1C2 | RefCore21 | c1ccc2c(c1)CN=N2 | 0.0357 |
| JOB05 | Reinforcement_learning_DockStream_demo_2589 | C1CNC2NCCC2C1 | RefCore25 | c1cc2nc[nH]c2cn1 | 0.0588 |
| JOB05 | Reinforcement_learning_DockStream_demo_2590 | C1CNC2NCCC2C1 | RefCore25 | c1cc2nc[nH]c2cn1 | 0.0588 |
| JOB05 | Reinforcement_learning_DockStream_demo_2593 | C1CNC2NCCC2C1 | RefCore25 | c1cc2nc[nH]c2cn1 | 0.0588 |
| JOB05 | Reinforcement_learning_DockStream_demo_2598 | C1CNC2NCCC2C1 | RefCore25 | c1cc2nc[nH]c2cn1 | 0.0588 |
| JOB05 | Reinforcement_learning_DockStream_demo_2599 | C1C[C@H]2CC[C@H]1C2 | RefCore14 | c1cn2cncc2cn1 | 0.0714 |
| JOB05 | Reinforcement_learning_DockStream_demo_2608 | C1CNC2NCCC2C1 | RefCore25 | c1cc2nc[nH]c2cn1 | 0.0588 |
| JOB05 | Reinforcement_learning_DockStream_demo_261 | c1ccn2nc3c(c2c1)CCCNC3 | RefCore10 | C1=Nc2nccnc2C1 | 0.2683 |
| JOB05 | Reinforcement_learning_DockStream_demo_2610 | C1CNC2NCCC2C1 | RefCore25 | c1cc2nc[nH]c2cn1 | 0.0588 |
| JOB05 | Reinforcement_learning_DockStream_demo_2611 | C1CNC2NCCC2C1 | RefCore25 | c1cc2nc[nH]c2cn1 | 0.0588 |
| JOB05 | Reinforcement_learning_DockStream_demo_2613 | C1CNC2NCCC2C1 | RefCore25 | c1cc2nc[nH]c2cn1 | 0.0588 |
| JOB05 | Reinforcement_learning_DockStream_demo_2615 | C1CNC2NCCC2C1 | RefCore25 | c1cc2nc[nH]c2cn1 | 0.0588 |
| JOB05 | Reinforcement_learning_DockStream_demo_2617 | C1C[C@@H]2[NH2+]CC[C@@H]2CN1 | RefCore21 | c1ccc2c(c1)CN=N2 | 0.0263 |
| JOB05 | Reinforcement_learning_DockStream_demo_2619 | c1cnc2cnccc2c1 | RefCore48 | c1ccn2nccc2c1 | 0.5833 |
| JOB05 | Reinforcement_learning_DockStream_demo_262 | c1ccc2ncncc2c1 | RefCore48 | c1ccn2nccc2c1 | 0.4800 |
| JOB05 | Reinforcement_learning_DockStream_demo_2622 | C1CNC2NCCC2C1 | RefCore25 | c1cc2nc[nH]c2cn1 | 0.0588 |
| JOB05 | Reinforcement_learning_DockStream_demo_2623 | C1CCC2NCNC2C1 | RefCore37 | C1=Cc2ccccc2[N]1 | 0.0690 |
| JOB05 | Reinforcement_learning_DockStream_demo_2625 | C1CCC2NNCC2C1 | RefCore21 | c1ccc2c(c1)CN=N2 | 0.0286 |
| JOB05 | Reinforcement_learning_DockStream_demo_2629 | C1CNC2NCCC2C1 | RefCore25 | c1cc2nc[nH]c2cn1 | 0.0588 |
| JOB05 | Reinforcement_learning_DockStream_demo_2630 | C1CNC2NCCC2C1 | RefCore25 | c1cc2nc[nH]c2cn1 | 0.0588 |
| JOB05 | Reinforcement_learning_DockStream_demo_2633 | C1CNC2NCCC2C1 | RefCore25 | c1cc2nc[nH]c2cn1 | 0.0588 |
| JOB05 | Reinforcement_learning_DockStream_demo_2640 | C1CNC2NCCC2C1 | RefCore25 | c1cc2nc[nH]c2cn1 | 0.0588 |
| JOB05 | Reinforcement_learning_DockStream_demo_2642 | C1CNC2NCCC2C1 | RefCore25 | c1cc2nc[nH]c2cn1 | 0.0588 |
| JOB05 | Reinforcement_learning_DockStream_demo_2647 | C1CNC2NCCC2C1 | RefCore25 | c1cc2nc[nH]c2cn1 | 0.0588 |
| JOB05 | Reinforcement_learning_DockStream_demo_2649 | C1CNC2NCCC2C1 | RefCore25 | c1cc2nc[nH]c2cn1 | 0.0588 |
| JOB05 | Reinforcement_learning_DockStream_demo_2650 | C1CCC2NNCC2C1 | RefCore21 | c1ccc2c(c1)CN=N2 | 0.0286 |
| JOB05 | Reinforcement_learning_DockStream_demo_2664 | C1C[C@H]2CNC[C@@H]1C2 | RefCore21 | c1ccc2c(c1)CN=N2 | 0.0333 |
| JOB05 | Reinforcement_learning_DockStream_demo_2665 | C1CNC2NCCC2C1 | RefCore25 | c1cc2nc[nH]c2cn1 | 0.0588 |
| JOB05 | Reinforcement_learning_DockStream_demo_2666 | C1CNC2NCCC2C1 | RefCore25 | c1cc2nc[nH]c2cn1 | 0.0588 |
| JOB05 | Reinforcement_learning_DockStream_demo_2676 | C1CNC2NCCC2C1 | RefCore25 | c1cc2nc[nH]c2cn1 | 0.0588 |
| JOB05 | Reinforcement_learning_DockStream_demo_2680 | C1CNC2NCCC2C1 | RefCore25 | c1cc2nc[nH]c2cn1 | 0.0588 |
| JOB05 | Reinforcement_learning_DockStream_demo_2682 | C1CNC2NCCC2C1 | RefCore25 | c1cc2nc[nH]c2cn1 | 0.0588 |
| JOB05 | Reinforcement_learning_DockStream_demo_2683 | C1CNC2NCCC2C1 | RefCore25 | c1cc2nc[nH]c2cn1 | 0.0588 |
| JOB05 | Reinforcement_learning_DockStream_demo_2684 | C1CNC2NCCC2C1 | RefCore25 | c1cc2nc[nH]c2cn1 | 0.0588 |
| JOB05 | Reinforcement_learning_DockStream_demo_2690 | C1CNC2NCCC2C1 | RefCore25 | c1cc2nc[nH]c2cn1 | 0.0588 |
| JOB05 | Reinforcement_learning_DockStream_demo_2694 | C1CNC2NCCC2C1 | RefCore25 | c1cc2nc[nH]c2cn1 | 0.0588 |
| JOB05 | Reinforcement_learning_DockStream_demo_2695 | C1CNC2NCCC2C1 | RefCore25 | c1cc2nc[nH]c2cn1 | 0.0588 |
| JOB05 | Reinforcement_learning_DockStream_demo_27 | c1ccn2nc3c(c2c1)CCCNC3 | RefCore10 | C1=Nc2nccnc2C1 | 0.2683 |
| JOB05 | Reinforcement_learning_DockStream_demo_270 | c1ccn2nc3c(c2c1)CCC[NH2+]C3 | RefCore10 | C1=Nc2nccnc2C1 | 0.2683 |
| JOB05 | Reinforcement_learning_DockStream_demo_2701 | C1CNC2NCCC2C1 | RefCore25 | c1cc2nc[nH]c2cn1 | 0.0588 |
| JOB05 | Reinforcement_learning_DockStream_demo_2706 | C1CNC2NNCC2C1 | RefCore21 | c1ccc2c(c1)CN=N2 | 0.0263 |
| JOB05 | Reinforcement_learning_DockStream_demo_2711 | C1CNC2NCCC2C1 | RefCore25 | c1cc2nc[nH]c2cn1 | 0.0588 |
| JOB05 | Reinforcement_learning_DockStream_demo_2713 | C1CCC2NNCC2C1 | RefCore21 | c1ccc2c(c1)CN=N2 | 0.0286 |
| JOB05 | Reinforcement_learning_DockStream_demo_2718 | C1CNC2NCCC2C1 | RefCore25 | c1cc2nc[nH]c2cn1 | 0.0588 |
| JOB05 | Reinforcement_learning_DockStream_demo_2719 | C1CNC2NCCC2C1 | RefCore25 | c1cc2nc[nH]c2cn1 | 0.0588 |
| JOB05 | Reinforcement_learning_DockStream_demo_2720 | c1cn2ccoc2n1 | RefCore44 | c1ccn2ncnc2c1 | 0.3448 |
| JOB05 | Reinforcement_learning_DockStream_demo_2721 | C1NC[C@H]2C[C@@H]1C2 | RefCore21 | c1ccc2c(c1)CN=N2 | 0.0357 |
| JOB05 | Reinforcement_learning_DockStream_demo_2723 | C1CNC2NCCC2N1 | RefCore21 | c1ccc2c(c1)CN=N2 | 0.0313 |
| JOB05 | Reinforcement_learning_DockStream_demo_2729 | C1CNC2NCCC2C1 | RefCore25 | c1cc2nc[nH]c2cn1 | 0.0588 |
| JOB05 | Reinforcement_learning_DockStream_demo_2730 | C1CNC2NCCC2C1 | RefCore25 | c1cc2nc[nH]c2cn1 | 0.0588 |
| JOB05 | Reinforcement_learning_DockStream_demo_2734 | C1CNC2NCCC2C1 | RefCore25 | c1cc2nc[nH]c2cn1 | 0.0588 |
| JOB05 | Reinforcement_learning_DockStream_demo_2736 | C1CNC2NCCC2C1 | RefCore25 | c1cc2nc[nH]c2cn1 | 0.0588 |
| JOB05 | Reinforcement_learning_DockStream_demo_2737 | C1CCC2NNCC2C1 | RefCore21 | c1ccc2c(c1)CN=N2 | 0.0286 |
| JOB05 | Reinforcement_learning_DockStream_demo_2742 | c1ccc2c(c1)CCC2 | RefCore6 | C1=Nc2ncccc2C1 | 0.3333 |
| JOB05 | Reinforcement_learning_DockStream_demo_2743 | C1CNC2NCCC2C1 | RefCore25 | c1cc2nc[nH]c2cn1 | 0.0588 |
| JOB05 | Reinforcement_learning_DockStream_demo_2745 | C1CNC2NCCC2C1 | RefCore25 | c1cc2nc[nH]c2cn1 | 0.0588 |
| JOB05 | Reinforcement_learning_DockStream_demo_2746 | C1CNC2NCCC2C1 | RefCore25 | c1cc2nc[nH]c2cn1 | 0.0588 |
| JOB05 | Reinforcement_learning_DockStream_demo_275 | C1CCC2NNCC2C1 | RefCore21 | c1ccc2c(c1)CN=N2 | 0.0286 |
| JOB05 | Reinforcement_learning_DockStream_demo_2752 | C1CNC2NCCC2C1 | RefCore25 | c1cc2nc[nH]c2cn1 | 0.0588 |
| JOB05 | Reinforcement_learning_DockStream_demo_2754 | C1CNC2NCCC2C1 | RefCore25 | c1cc2nc[nH]c2cn1 | 0.0588 |
| JOB05 | Reinforcement_learning_DockStream_demo_2755 | C1N[C@H]2C[C@H](C2)[C@H]2C[C@@H]12 | RefCore37 | C1=Cc2ccccc2[N]1 | 0.0606 |
| JOB05 | Reinforcement_learning_DockStream_demo_2757 | C1CNC2NNCC2C1 | RefCore21 | c1ccc2c(c1)CN=N2 | 0.0263 |
| JOB05 | Reinforcement_learning_DockStream_demo_2758 | C1CNC2NCCC2C1 | RefCore25 | c1cc2nc[nH]c2cn1 | 0.0588 |
| JOB05 | Reinforcement_learning_DockStream_demo_2761 | C1CNC2NCCC2C1 | RefCore25 | c1cc2nc[nH]c2cn1 | 0.0588 |
| JOB05 | Reinforcement_learning_DockStream_demo_2762 | C1CCC2NNCC2C1 | RefCore21 | c1ccc2c(c1)CN=N2 | 0.0286 |
| JOB05 | Reinforcement_learning_DockStream_demo_2764 | c1ccc2c(c1)COC2 | RefCore6 | C1=Nc2ncccc2C1 | 0.3200 |
| JOB05 | Reinforcement_learning_DockStream_demo_2766 | C1CNC2NCCC2C1 | RefCore25 | c1cc2nc[nH]c2cn1 | 0.0588 |
| JOB05 | Reinforcement_learning_DockStream_demo_2767 | C1CNC2NCCC2C1 | RefCore25 | c1cc2nc[nH]c2cn1 | 0.0588 |
| JOB05 | Reinforcement_learning_DockStream_demo_277 | c1ccc2c(c1)CCCN2 | RefCore6 | C1=Nc2ncccc2C1 | 0.2500 |
| JOB05 | Reinforcement_learning_DockStream_demo_2770 | C1CNC2NCCC2C1 | RefCore25 | c1cc2nc[nH]c2cn1 | 0.0588 |
| JOB05 | Reinforcement_learning_DockStream_demo_2771 | C1CNC2NCCC2C1 | RefCore25 | c1cc2nc[nH]c2cn1 | 0.0588 |
| JOB05 | Reinforcement_learning_DockStream_demo_2775 | C1CNC2NCCC2C1 | RefCore25 | c1cc2nc[nH]c2cn1 | 0.0588 |
| JOB05 | Reinforcement_learning_DockStream_demo_2777 | C1CNC2NCCC2C1 | RefCore25 | c1cc2nc[nH]c2cn1 | 0.0588 |
| JOB05 | Reinforcement_learning_DockStream_demo_2778 | C1CNC2NCCC2C1 | RefCore25 | c1cc2nc[nH]c2cn1 | 0.0588 |
| JOB05 | Reinforcement_learning_DockStream_demo_2779 | c1ccc2ocnc2c1 | RefCore48 | c1ccn2nccc2c1 | 0.3333 |
| JOB05 | Reinforcement_learning_DockStream_demo_278 | c1ccc2c(c1)COC2 | RefCore6 | C1=Nc2ncccc2C1 | 0.3200 |
| JOB05 | Reinforcement_learning_DockStream_demo_2780 | C1CNC2NCCC2C1 | RefCore25 | c1cc2nc[nH]c2cn1 | 0.0588 |
| JOB05 | Reinforcement_learning_DockStream_demo_2781 | C1CNC2NCCC2C1 | RefCore25 | c1cc2nc[nH]c2cn1 | 0.0588 |
| JOB05 | Reinforcement_learning_DockStream_demo_2786 | C1CNC2NCCC2C1 | RefCore25 | c1cc2nc[nH]c2cn1 | 0.0588 |
| JOB05 | Reinforcement_learning_DockStream_demo_2787 | C1CNC2NCCC2C1 | RefCore25 | c1cc2nc[nH]c2cn1 | 0.0588 |
| JOB05 | Reinforcement_learning_DockStream_demo_2790 | C1CNC2NCCC2C1 | RefCore25 | c1cc2nc[nH]c2cn1 | 0.0588 |
| JOB05 | Reinforcement_learning_DockStream_demo_2793 | c1ccc2c(c1)CCCC2 | RefCore6 | C1=Nc2ncccc2C1 | 0.3333 |
| JOB05 | Reinforcement_learning_DockStream_demo_280 | c1ccn2nc3c(c2c1)CCCC[NH2+]3 | RefCore10 | C1=Nc2nccnc2C1 | 0.2750 |
| JOB05 | Reinforcement_learning_DockStream_demo_2802 | C1CNC2NCCC2C1 | RefCore25 | c1cc2nc[nH]c2cn1 | 0.0588 |
| JOB05 | Reinforcement_learning_DockStream_demo_2804 | C1CNC2NCCC2C1 | RefCore25 | c1cc2nc[nH]c2cn1 | 0.0588 |
| JOB05 | Reinforcement_learning_DockStream_demo_2808 | C1CNC2NCCC2C1 | RefCore25 | c1cc2nc[nH]c2cn1 | 0.0588 |
| JOB05 | Reinforcement_learning_DockStream_demo_2809 | C1CNC2NCCC2C1 | RefCore25 | c1cc2nc[nH]c2cn1 | 0.0588 |
| JOB05 | Reinforcement_learning_DockStream_demo_2811 | C1CNC2NCCC2C1 | RefCore25 | c1cc2nc[nH]c2cn1 | 0.0588 |
| JOB05 | Reinforcement_learning_DockStream_demo_2813 | C1CNC2NCCC2C1 | RefCore25 | c1cc2nc[nH]c2cn1 | 0.0588 |
| JOB05 | Reinforcement_learning_DockStream_demo_2814 | C1CNC2NCCC2C1 | RefCore25 | c1cc2nc[nH]c2cn1 | 0.0588 |
| JOB05 | Reinforcement_learning_DockStream_demo_2818 | c1ccc2ccccc2c1 | RefCore48 | c1ccn2nccc2c1 | 0.3889 |
| JOB05 | Reinforcement_learning_DockStream_demo_2820 | C1CNC2NCCC2C1 | RefCore25 | c1cc2nc[nH]c2cn1 | 0.0588 |
| JOB05 | Reinforcement_learning_DockStream_demo_2821 | C1CCC2NNCC2C1 | RefCore21 | c1ccc2c(c1)CN=N2 | 0.0286 |
| JOB05 | Reinforcement_learning_DockStream_demo_2824 | C1CCC2NNCC2C1 | RefCore21 | c1ccc2c(c1)CN=N2 | 0.0286 |
| JOB05 | Reinforcement_learning_DockStream_demo_2828 | C1CNC2NCCC2C1 | RefCore25 | c1cc2nc[nH]c2cn1 | 0.0588 |
| JOB05 | Reinforcement_learning_DockStream_demo_2832 | C1CCC2NNCC2C1 | RefCore21 | c1ccc2c(c1)CN=N2 | 0.0286 |
| JOB05 | Reinforcement_learning_DockStream_demo_2838 | C1CNC2NCCC2C1 | RefCore25 | c1cc2nc[nH]c2cn1 | 0.0588 |
| JOB05 | Reinforcement_learning_DockStream_demo_2839 | C1CNC2NCCC2C1 | RefCore25 | c1cc2nc[nH]c2cn1 | 0.0588 |
| JOB05 | Reinforcement_learning_DockStream_demo_2842 | C1CNC2NCCC2C1 | RefCore25 | c1cc2nc[nH]c2cn1 | 0.0588 |
| JOB05 | Reinforcement_learning_DockStream_demo_2844 | C1CNC2NNCC2C1 | RefCore21 | c1ccc2c(c1)CN=N2 | 0.0263 |
| JOB05 | Reinforcement_learning_DockStream_demo_2845 | C1CNC2NCCC2C1 | RefCore25 | c1cc2nc[nH]c2cn1 | 0.0588 |
| JOB05 | Reinforcement_learning_DockStream_demo_2846 | C1CNC2NCCC2C1 | RefCore25 | c1cc2nc[nH]c2cn1 | 0.0588 |
| JOB05 | Reinforcement_learning_DockStream_demo_2847 | C1CNC2NCCC2C1 | RefCore25 | c1cc2nc[nH]c2cn1 | 0.0588 |
| JOB05 | Reinforcement_learning_DockStream_demo_2848 | C1CNC2NCCC2C1 | RefCore25 | c1cc2nc[nH]c2cn1 | 0.0588 |
| JOB05 | Reinforcement_learning_DockStream_demo_2849 | C1CCC2OCCCC2C1 | RefCore37 | C1=Cc2ccccc2[N]1 | 0.0606 |
| JOB05 | Reinforcement_learning_DockStream_demo_2854 | C1CNC2NCCC2C1 | RefCore25 | c1cc2nc[nH]c2cn1 | 0.0588 |
| JOB05 | Reinforcement_learning_DockStream_demo_2864 | C1CNC2NCCC2C1 | RefCore25 | c1cc2nc[nH]c2cn1 | 0.0588 |
| JOB05 | Reinforcement_learning_DockStream_demo_2865 | C1CNC2NNCC2C1 | RefCore21 | c1ccc2c(c1)CN=N2 | 0.0263 |
| JOB05 | Reinforcement_learning_DockStream_demo_2866 | c1ccc2ocnc2c1 | RefCore48 | c1ccn2nccc2c1 | 0.3333 |
| JOB05 | Reinforcement_learning_DockStream_demo_2868 | C1CNC2NCCC2C1 | RefCore25 | c1cc2nc[nH]c2cn1 | 0.0588 |
| JOB05 | Reinforcement_learning_DockStream_demo_2872 | C1CNC2NCCC2C1 | RefCore25 | c1cc2nc[nH]c2cn1 | 0.0588 |
| JOB05 | Reinforcement_learning_DockStream_demo_2875 | c1ccn2nc3c(c2c1)CCCC[NH2+]3 | RefCore10 | C1=Nc2nccnc2C1 | 0.2750 |
| JOB05 | Reinforcement_learning_DockStream_demo_2876 | C1CNC2NCCC2C1 | RefCore25 | c1cc2nc[nH]c2cn1 | 0.0588 |
| JOB05 | Reinforcement_learning_DockStream_demo_2879 | C1C[C@@H]2CC[C@@H]2N1 | RefCore21 | c1ccc2c(c1)CN=N2 | 0.0313 |
| JOB05 | Reinforcement_learning_DockStream_demo_288 | c1ccn2nc3c(c2c1)CC[NH2+][C@H]1CC[NH2+]C[C@H]31 | RefCore10 | C1=Nc2nccnc2C1 | 0.2500 |
| JOB05 | Reinforcement_learning_DockStream_demo_2882 | C1CNC2NCCC2C1 | RefCore25 | c1cc2nc[nH]c2cn1 | 0.0588 |
| JOB05 | Reinforcement_learning_DockStream_demo_2883 | C1CNC2NCCC2C1 | RefCore25 | c1cc2nc[nH]c2cn1 | 0.0588 |
| JOB05 | Reinforcement_learning_DockStream_demo_2885 | C1CNC2NCCC2C1 | RefCore25 | c1cc2nc[nH]c2cn1 | 0.0588 |
| JOB05 | Reinforcement_learning_DockStream_demo_2886 | C1CCC2NNCC2C1 | RefCore21 | c1ccc2c(c1)CN=N2 | 0.0286 |
| JOB05 | Reinforcement_learning_DockStream_demo_2887 | C1CCC2OCCCC2C1 | RefCore37 | C1=Cc2ccccc2[N]1 | 0.0606 |
| JOB05 | Reinforcement_learning_DockStream_demo_2894 | C1C[C@H]2C[C@H](C2)N1 | RefCore21 | c1ccc2c(c1)CN=N2 | 0.0313 |
| JOB05 | Reinforcement_learning_DockStream_demo_2895 | C1C[C@H]2CNC[C@@H]1C2 | RefCore21 | c1ccc2c(c1)CN=N2 | 0.0333 |
| JOB05 | Reinforcement_learning_DockStream_demo_2896 | C1CNC2NCCC2C1 | RefCore25 | c1cc2nc[nH]c2cn1 | 0.0588 |
| JOB05 | Reinforcement_learning_DockStream_demo_2900 | C1CNC2NCCC2C1 | RefCore25 | c1cc2nc[nH]c2cn1 | 0.0588 |
| JOB05 | Reinforcement_learning_DockStream_demo_2904 | C1CNC2NCCC2C1 | RefCore25 | c1cc2nc[nH]c2cn1 | 0.0588 |
| JOB05 | Reinforcement_learning_DockStream_demo_2905 | C1CNC2NCCC2C1 | RefCore25 | c1cc2nc[nH]c2cn1 | 0.0588 |
| JOB05 | Reinforcement_learning_DockStream_demo_2906 | C1CNC2NCCC2C1 | RefCore25 | c1cc2nc[nH]c2cn1 | 0.0588 |
| JOB05 | Reinforcement_learning_DockStream_demo_2908 | C1CNC2NCCC2C1 | RefCore25 | c1cc2nc[nH]c2cn1 | 0.0588 |
| JOB05 | Reinforcement_learning_DockStream_demo_2909 | C1CNC2NCCC2C1 | RefCore25 | c1cc2nc[nH]c2cn1 | 0.0588 |
| JOB05 | Reinforcement_learning_DockStream_demo_2911 | c1ccc2ccccc2c1 | RefCore48 | c1ccn2nccc2c1 | 0.3889 |
| JOB05 | Reinforcement_learning_DockStream_demo_2920 | C1CNC2NCCC2C1 | RefCore25 | c1cc2nc[nH]c2cn1 | 0.0588 |
| JOB05 | Reinforcement_learning_DockStream_demo_2932 | C1CNC2NCCC2C1 | RefCore25 | c1cc2nc[nH]c2cn1 | 0.0588 |
| JOB05 | Reinforcement_learning_DockStream_demo_2935 | C1CNC2NCCC2C1 | RefCore25 | c1cc2nc[nH]c2cn1 | 0.0588 |
| JOB05 | Reinforcement_learning_DockStream_demo_2937 | C1CCC2NNCC2C1 | RefCore21 | c1ccc2c(c1)CN=N2 | 0.0286 |
| JOB05 | Reinforcement_learning_DockStream_demo_294 | c1ccc2ncncc2c1 | RefCore48 | c1ccn2nccc2c1 | 0.4800 |
| JOB05 | Reinforcement_learning_DockStream_demo_2944 | C1CNC2NCCC2C1 | RefCore25 | c1cc2nc[nH]c2cn1 | 0.0588 |
| JOB05 | Reinforcement_learning_DockStream_demo_2946 | C1CCC2NNCC2C1 | RefCore21 | c1ccc2c(c1)CN=N2 | 0.0286 |
| JOB05 | Reinforcement_learning_DockStream_demo_2947 | C1CNC2NCCC2C1 | RefCore25 | c1cc2nc[nH]c2cn1 | 0.0588 |
| JOB05 | Reinforcement_learning_DockStream_demo_2948 | C1CNC2NCCC2C1 | RefCore25 | c1cc2nc[nH]c2cn1 | 0.0588 |
| JOB05 | Reinforcement_learning_DockStream_demo_295 | c1ccn2nc3c(c2c1)CCC[NH2+]C3 | RefCore10 | C1=Nc2nccnc2C1 | 0.2683 |
| JOB05 | Reinforcement_learning_DockStream_demo_2952 | C1CNC2NCCC2C1 | RefCore25 | c1cc2nc[nH]c2cn1 | 0.0588 |
| JOB05 | Reinforcement_learning_DockStream_demo_2954 | C1CNC2NCCC2C1 | RefCore25 | c1cc2nc[nH]c2cn1 | 0.0588 |
| JOB05 | Reinforcement_learning_DockStream_demo_2956 | C12NCC3CC3C1C4CC2C4 | RefCore9 | c1ccc2[nH]cnc2c1 | 0.0541 |
| JOB05 | Reinforcement_learning_DockStream_demo_2963 | C1CNC2NCCC2C1 | RefCore25 | c1cc2nc[nH]c2cn1 | 0.0588 |
| JOB05 | Reinforcement_learning_DockStream_demo_2964 | C1CNC2NCCC2C1 | RefCore25 | c1cc2nc[nH]c2cn1 | 0.0588 |
| JOB05 | Reinforcement_learning_DockStream_demo_2965 | C1CNC2NCCC2C1 | RefCore25 | c1cc2nc[nH]c2cn1 | 0.0588 |
| JOB05 | Reinforcement_learning_DockStream_demo_2966 | C1CNC2NCCC2C1 | RefCore25 | c1cc2nc[nH]c2cn1 | 0.0588 |
| JOB05 | Reinforcement_learning_DockStream_demo_2975 | C1CNC2NCCC2C1 | RefCore25 | c1cc2nc[nH]c2cn1 | 0.0588 |
| JOB05 | Reinforcement_learning_DockStream_demo_2977 | C1CNC2NCCC2C1 | RefCore25 | c1cc2nc[nH]c2cn1 | 0.0588 |
| JOB05 | Reinforcement_learning_DockStream_demo_2979 | C1CNC2NCCC2C1 | RefCore25 | c1cc2nc[nH]c2cn1 | 0.0588 |
| JOB05 | Reinforcement_learning_DockStream_demo_2980 | C1CNC2NCCC2C1 | RefCore25 | c1cc2nc[nH]c2cn1 | 0.0588 |
| JOB05 | Reinforcement_learning_DockStream_demo_2983 | c1ccc2ccccc2c1 | RefCore48 | c1ccn2nccc2c1 | 0.3889 |
| JOB05 | Reinforcement_learning_DockStream_demo_2984 | C1CNC2NCCC2C1 | RefCore25 | c1cc2nc[nH]c2cn1 | 0.0588 |
| JOB05 | Reinforcement_learning_DockStream_demo_2991 | C1CNC2NCCC2C1 | RefCore25 | c1cc2nc[nH]c2cn1 | 0.0588 |
| JOB05 | Reinforcement_learning_DockStream_demo_2998 | c1ccc2c(c1)CCNC2 | RefCore6 | C1=Nc2ncccc2C1 | 0.2667 |
| JOB05 | Reinforcement_learning_DockStream_demo_30 | c1ccn2nc3c(c2c1)CCCNC3 | RefCore10 | C1=Nc2nccnc2C1 | 0.2683 |
| JOB05 | Reinforcement_learning_DockStream_demo_300 | c1ccn2nc3c(c2c1)CCCNC3 | RefCore10 | C1=Nc2nccnc2C1 | 0.2683 |
| JOB05 | Reinforcement_learning_DockStream_demo_3002 | C1CNC2NCCC2C1 | RefCore25 | c1cc2nc[nH]c2cn1 | 0.0588 |
| JOB05 | Reinforcement_learning_DockStream_demo_3010 | C1CNC2NCCC2C1 | RefCore25 | c1cc2nc[nH]c2cn1 | 0.0588 |
| JOB05 | Reinforcement_learning_DockStream_demo_3011 | C1CNC2NCCC2C1 | RefCore25 | c1cc2nc[nH]c2cn1 | 0.0588 |
| JOB05 | Reinforcement_learning_DockStream_demo_3012 | C1CCC2OCCCC2C1 | RefCore37 | C1=Cc2ccccc2[N]1 | 0.0606 |
| JOB05 | Reinforcement_learning_DockStream_demo_3013 | C1CNC2NCCC2C1 | RefCore25 | c1cc2nc[nH]c2cn1 | 0.0588 |
| JOB05 | Reinforcement_learning_DockStream_demo_3015 | C1C[C@H]2CCNC[C@H]2C1 | RefCore9 | c1ccc2[nH]cnc2c1 | 0.0588 |
| JOB05 | Reinforcement_learning_DockStream_demo_3017 | C1CNC2NCCC2C1 | RefCore25 | c1cc2nc[nH]c2cn1 | 0.0588 |
| JOB05 | Reinforcement_learning_DockStream_demo_3018 | C1CNC2NCCC2C1 | RefCore25 | c1cc2nc[nH]c2cn1 | 0.0588 |
| JOB05 | Reinforcement_learning_DockStream_demo_3023 | C1CCC2NNCC2C1 | RefCore21 | c1ccc2c(c1)CN=N2 | 0.0286 |
| JOB05 | Reinforcement_learning_DockStream_demo_3024 | C1CNC2NCCC2C1 | RefCore25 | c1cc2nc[nH]c2cn1 | 0.0588 |
| JOB05 | Reinforcement_learning_DockStream_demo_3026 | C1CNC2NCCC2C1 | RefCore25 | c1cc2nc[nH]c2cn1 | 0.0588 |
| JOB05 | Reinforcement_learning_DockStream_demo_3027 | c1ccc2ccccc2c1 | RefCore48 | c1ccn2nccc2c1 | 0.3889 |
| JOB05 | Reinforcement_learning_DockStream_demo_3028 | c1ccc2ncncc2c1 | RefCore48 | c1ccn2nccc2c1 | 0.4800 |
| JOB05 | Reinforcement_learning_DockStream_demo_3030 | C1CCC2NNCC2C1 | RefCore21 | c1ccc2c(c1)CN=N2 | 0.0286 |
| JOB05 | Reinforcement_learning_DockStream_demo_3031 | C1CNC2NCCC2C1 | RefCore25 | c1cc2nc[nH]c2cn1 | 0.0588 |
| JOB05 | Reinforcement_learning_DockStream_demo_3033 | C1CNC2NCCC2C1 | RefCore25 | c1cc2nc[nH]c2cn1 | 0.0588 |
| JOB05 | Reinforcement_learning_DockStream_demo_3035 | C1CNC2NCCC2C1 | RefCore25 | c1cc2nc[nH]c2cn1 | 0.0588 |
| JOB05 | Reinforcement_learning_DockStream_demo_3046 | C1CNC2NCCC2C1 | RefCore25 | c1cc2nc[nH]c2cn1 | 0.0588 |
| JOB05 | Reinforcement_learning_DockStream_demo_3047 | c1cnc2cccnc2c1 | RefCore48 | c1ccn2nccc2c1 | 0.6667 |
| JOB05 | Reinforcement_learning_DockStream_demo_305 | n1(nc2c3CC[NH2+]C4CCOCC24)c3cccc1 | RefCore10 | C1=Nc2nccnc2C1 | 0.2653 |
| JOB05 | Reinforcement_learning_DockStream_demo_3050 | C1CNC2NCCC2C1 | RefCore25 | c1cc2nc[nH]c2cn1 | 0.0588 |
| JOB05 | Reinforcement_learning_DockStream_demo_3051 | C1CNC2NCCC2C1 | RefCore25 | c1cc2nc[nH]c2cn1 | 0.0588 |
| JOB05 | Reinforcement_learning_DockStream_demo_3055 | C1CNC2NCCC2C1 | RefCore25 | c1cc2nc[nH]c2cn1 | 0.0588 |
| JOB05 | Reinforcement_learning_DockStream_demo_3060 | C1CNC2NCCC2C1 | RefCore25 | c1cc2nc[nH]c2cn1 | 0.0588 |
| JOB05 | Reinforcement_learning_DockStream_demo_3064 | C1CNC2NCCC2C1 | RefCore25 | c1cc2nc[nH]c2cn1 | 0.0588 |
| JOB05 | Reinforcement_learning_DockStream_demo_3066 | C1CNC2NCCC2C1 | RefCore25 | c1cc2nc[nH]c2cn1 | 0.0588 |
| JOB05 | Reinforcement_learning_DockStream_demo_3067 | C1CNC2NCCC2C1 | RefCore25 | c1cc2nc[nH]c2cn1 | 0.0588 |
| JOB05 | Reinforcement_learning_DockStream_demo_3068 | C1CNC2NCCC2C1 | RefCore25 | c1cc2nc[nH]c2cn1 | 0.0588 |
| JOB05 | Reinforcement_learning_DockStream_demo_3071 | c1cnc2occc2c1 | RefCore32 | C1=NCc2ccccc21 | 0.4828 |
| JOB05 | Reinforcement_learning_DockStream_demo_3075 | C1CNC2NCCC2C1 | RefCore25 | c1cc2nc[nH]c2cn1 | 0.0588 |
| JOB05 | Reinforcement_learning_DockStream_demo_3077 | C1CCC2NCCC2C1 | RefCore21 | c1ccc2c(c1)CN=N2 | 0.0294 |
| JOB05 | Reinforcement_learning_DockStream_demo_3078 | c1ccc2nccnc2c1 | RefCore48 | c1ccn2nccc2c1 | 0.5789 |
| JOB05 | Reinforcement_learning_DockStream_demo_3081 | C1CNC2NCCC2C1 | RefCore25 | c1cc2nc[nH]c2cn1 | 0.0588 |
| JOB05 | Reinforcement_learning_DockStream_demo_3087 | C1CC2(CCN1)CCNC2 | RefCore21 | c1ccc2c(c1)CN=N2 | 0.0323 |
| JOB05 | Reinforcement_learning_DockStream_demo_309 | c1ccn2nc3c(c2c1)CCCNC3 | RefCore10 | C1=Nc2nccnc2C1 | 0.2683 |
| JOB05 | Reinforcement_learning_DockStream_demo_3090 | C1CNC2NNCC2C1 | RefCore21 | c1ccc2c(c1)CN=N2 | 0.0263 |
| JOB05 | Reinforcement_learning_DockStream_demo_3093 | C1CNC2NCCC2C1 | RefCore25 | c1cc2nc[nH]c2cn1 | 0.0588 |
| JOB05 | Reinforcement_learning_DockStream_demo_3096 | C1CNC2NCCC2C1 | RefCore25 | c1cc2nc[nH]c2cn1 | 0.0588 |
| JOB05 | Reinforcement_learning_DockStream_demo_3099 | C1CNC2NCCC2C1 | RefCore25 | c1cc2nc[nH]c2cn1 | 0.0588 |
| JOB05 | Reinforcement_learning_DockStream_demo_3100 | c1ccc2nnccc2c1 | RefCore48 | c1ccn2nccc2c1 | 0.5000 |
| JOB05 | Reinforcement_learning_DockStream_demo_3101 | C1CNC2NCCC2C1 | RefCore25 | c1cc2nc[nH]c2cn1 | 0.0588 |
| JOB05 | Reinforcement_learning_DockStream_demo_3103 | C1CNC2NCCC2C1 | RefCore25 | c1cc2nc[nH]c2cn1 | 0.0588 |
| JOB05 | Reinforcement_learning_DockStream_demo_3108 | C1CNC2NCCC2C1 | RefCore25 | c1cc2nc[nH]c2cn1 | 0.0588 |
| JOB05 | Reinforcement_learning_DockStream_demo_3109 | C1CCC2NNCC2C1 | RefCore21 | c1ccc2c(c1)CN=N2 | 0.0286 |
| JOB05 | Reinforcement_learning_DockStream_demo_3110 | c1ccc2nccnc2c1 | RefCore48 | c1ccn2nccc2c1 | 0.5789 |
| JOB05 | Reinforcement_learning_DockStream_demo_3111 | C1CNC2NCCC2C1 | RefCore25 | c1cc2nc[nH]c2cn1 | 0.0588 |
| JOB05 | Reinforcement_learning_DockStream_demo_3112 | C1CNC2NCCC2C1 | RefCore25 | c1cc2nc[nH]c2cn1 | 0.0588 |
| JOB05 | Reinforcement_learning_DockStream_demo_3113 | c1ccn2cc[nH+]c2c1 | RefCore31 | c1ccc2c(c1)CN=N2 | 0.3333 |
| JOB05 | Reinforcement_learning_DockStream_demo_3114 | C1CNC2NCCC2C1 | RefCore25 | c1cc2nc[nH]c2cn1 | 0.0588 |
| JOB05 | Reinforcement_learning_DockStream_demo_3115 | C1CNC2NCCC2C1 | RefCore25 | c1cc2nc[nH]c2cn1 | 0.0588 |
| JOB05 | Reinforcement_learning_DockStream_demo_3117 | C1CNC2NCCC2C1 | RefCore25 | c1cc2nc[nH]c2cn1 | 0.0588 |
| JOB05 | Reinforcement_learning_DockStream_demo_3126 | C1CNC2NCCC2C1 | RefCore25 | c1cc2nc[nH]c2cn1 | 0.0588 |
| JOB05 | Reinforcement_learning_DockStream_demo_3129 | C1CNC2NNCC2C1 | RefCore21 | c1ccc2c(c1)CN=N2 | 0.0263 |
| JOB05 | Reinforcement_learning_DockStream_demo_3131 | C1CCC2NNCC2C1 | RefCore21 | c1ccc2c(c1)CN=N2 | 0.0286 |
| JOB05 | Reinforcement_learning_DockStream_demo_3132 | C1CNC2NCCC2C1 | RefCore25 | c1cc2nc[nH]c2cn1 | 0.0588 |
| JOB05 | Reinforcement_learning_DockStream_demo_3133 | C1CNC2NNCC2C1 | RefCore21 | c1ccc2c(c1)CN=N2 | 0.0263 |
| JOB05 | Reinforcement_learning_DockStream_demo_3136 | C1CNC2NCCC2C1 | RefCore25 | c1cc2nc[nH]c2cn1 | 0.0588 |
| JOB05 | Reinforcement_learning_DockStream_demo_3138 | C1CNC2NCCC2C1 | RefCore25 | c1cc2nc[nH]c2cn1 | 0.0588 |
| JOB05 | Reinforcement_learning_DockStream_demo_3139 | C1CNC2NCCC2C1 | RefCore25 | c1cc2nc[nH]c2cn1 | 0.0588 |
| JOB05 | Reinforcement_learning_DockStream_demo_3141 | C1NC[C@H]2C[C@@H]12 | RefCore21 | c1ccc2c(c1)CN=N2 | 0.0357 |
| JOB05 | Reinforcement_learning_DockStream_demo_3143 | C1CNC2NCCC2C1 | RefCore25 | c1cc2nc[nH]c2cn1 | 0.0588 |
| JOB05 | Reinforcement_learning_DockStream_demo_3146 | C1CNC2NCCC2C1 | RefCore25 | c1cc2nc[nH]c2cn1 | 0.0588 |
| JOB05 | Reinforcement_learning_DockStream_demo_3147 | C1CNC2NCCC2C1 | RefCore25 | c1cc2nc[nH]c2cn1 | 0.0588 |
| JOB05 | Reinforcement_learning_DockStream_demo_3149 | C1CNC2NCCC2C1 | RefCore25 | c1cc2nc[nH]c2cn1 | 0.0588 |
| JOB05 | Reinforcement_learning_DockStream_demo_3152 | C1CNC2NCCC2C1 | RefCore25 | c1cc2nc[nH]c2cn1 | 0.0588 |
| JOB05 | Reinforcement_learning_DockStream_demo_3155 | C1CNC2NCCC2C1 | RefCore25 | c1cc2nc[nH]c2cn1 | 0.0588 |
| JOB05 | Reinforcement_learning_DockStream_demo_3160 | C1CNC2NCCC2C1 | RefCore25 | c1cc2nc[nH]c2cn1 | 0.0588 |
| JOB05 | Reinforcement_learning_DockStream_demo_3161 | C1CNC2NCCC2C1 | RefCore25 | c1cc2nc[nH]c2cn1 | 0.0588 |
| JOB05 | Reinforcement_learning_DockStream_demo_3165 | C1CNC2NCCC2C1 | RefCore25 | c1cc2nc[nH]c2cn1 | 0.0588 |
| JOB05 | Reinforcement_learning_DockStream_demo_3166 | C1CNC2NCCC2C1 | RefCore25 | c1cc2nc[nH]c2cn1 | 0.0588 |
| JOB05 | Reinforcement_learning_DockStream_demo_3168 | C1CNC2NCCC2C1 | RefCore25 | c1cc2nc[nH]c2cn1 | 0.0588 |
| JOB05 | Reinforcement_learning_DockStream_demo_317 | c1ccn2nc3c(c2c1)CCN1CNC[C@@H]1C3 | RefCore10 | C1=Nc2nccnc2C1 | 0.2553 |
| JOB05 | Reinforcement_learning_DockStream_demo_3175 | C1CCC2NNCC2C1 | RefCore21 | c1ccc2c(c1)CN=N2 | 0.0286 |
| JOB05 | Reinforcement_learning_DockStream_demo_3178 | C1CNC2NCCC2C1 | RefCore25 | c1cc2nc[nH]c2cn1 | 0.0588 |
| JOB05 | Reinforcement_learning_DockStream_demo_318 | c1ccn2nc3c(c2c1)CCC[NH2+]C3 | RefCore10 | C1=Nc2nccnc2C1 | 0.2683 |
| JOB05 | Reinforcement_learning_DockStream_demo_3181 | c1ccc2scnc2c1 | RefCore48 | c1ccn2nccc2c1 | 0.3333 |
| JOB05 | Reinforcement_learning_DockStream_demo_3183 | C1CNC2NCCC2C1 | RefCore25 | c1cc2nc[nH]c2cn1 | 0.0588 |
| JOB05 | Reinforcement_learning_DockStream_demo_3185 | C1CNC2NCCC2C1 | RefCore25 | c1cc2nc[nH]c2cn1 | 0.0588 |
| JOB05 | Reinforcement_learning_DockStream_demo_3189 | C1CNC2NCCC2C1 | RefCore25 | c1cc2nc[nH]c2cn1 | 0.0588 |
| JOB05 | Reinforcement_learning_DockStream_demo_3195 | C1CNC2NCCC2C1 | RefCore25 | c1cc2nc[nH]c2cn1 | 0.0588 |
| JOB05 | Reinforcement_learning_DockStream_demo_3197 | C1CNC2NCCC2C1 | RefCore25 | c1cc2nc[nH]c2cn1 | 0.0588 |
| JOB05 | Reinforcement_learning_DockStream_demo_320 | c1ccn2nc3c(c2c1)CCCNC3 | RefCore10 | C1=Nc2nccnc2C1 | 0.2683 |
| JOB05 | Reinforcement_learning_DockStream_demo_3204 | C1CNC2NNCC2C1 | RefCore21 | c1ccc2c(c1)CN=N2 | 0.0263 |
| JOB05 | Reinforcement_learning_DockStream_demo_3206 | C1CNC2NCCC2C1 | RefCore25 | c1cc2nc[nH]c2cn1 | 0.0588 |
| JOB05 | Reinforcement_learning_DockStream_demo_3210 | C1CNC2NCCC2C1 | RefCore25 | c1cc2nc[nH]c2cn1 | 0.0588 |
| JOB05 | Reinforcement_learning_DockStream_demo_3211 | C1CNC2NCCC2C1 | RefCore25 | c1cc2nc[nH]c2cn1 | 0.0588 |
| JOB05 | Reinforcement_learning_DockStream_demo_3213 | C1CNC2NCCC2C1 | RefCore25 | c1cc2nc[nH]c2cn1 | 0.0588 |
| JOB05 | Reinforcement_learning_DockStream_demo_3214 | C1CNC2NCCC2C1 | RefCore25 | c1cc2nc[nH]c2cn1 | 0.0588 |
| JOB05 | Reinforcement_learning_DockStream_demo_3215 | C1CNC2NCCC2C1 | RefCore25 | c1cc2nc[nH]c2cn1 | 0.0588 |
| JOB05 | Reinforcement_learning_DockStream_demo_3217 | C1CNC2NCCC2C1 | RefCore25 | c1cc2nc[nH]c2cn1 | 0.0588 |
| JOB05 | Reinforcement_learning_DockStream_demo_322 | c1ccc2c(c1)CCCC2 | RefCore6 | C1=Nc2ncccc2C1 | 0.3333 |
| JOB05 | Reinforcement_learning_DockStream_demo_3228 | C1CNC2NCCC2C1 | RefCore25 | c1cc2nc[nH]c2cn1 | 0.0588 |
| JOB05 | Reinforcement_learning_DockStream_demo_323 | c1ccn2nc3c(c2c1)CCNC3 | RefCore10 | C1=Nc2nccnc2C1 | 0.2821 |
| JOB05 | Reinforcement_learning_DockStream_demo_3231 | C1CNC2NCCC2C1 | RefCore25 | c1cc2nc[nH]c2cn1 | 0.0588 |
| JOB05 | Reinforcement_learning_DockStream_demo_3233 | C1CNC2NCCC2C1 | RefCore25 | c1cc2nc[nH]c2cn1 | 0.0588 |
| JOB05 | Reinforcement_learning_DockStream_demo_324 | c1ccc2ncncc2c1 | RefCore48 | c1ccn2nccc2c1 | 0.4800 |
| JOB05 | Reinforcement_learning_DockStream_demo_3245 | C1CNC2NCCC2C1 | RefCore25 | c1cc2nc[nH]c2cn1 | 0.0588 |
| JOB05 | Reinforcement_learning_DockStream_demo_3247 | C1CNC2NCCC2C1 | RefCore25 | c1cc2nc[nH]c2cn1 | 0.0588 |
| JOB05 | Reinforcement_learning_DockStream_demo_3249 | C1CNC2NCCC2C1 | RefCore25 | c1cc2nc[nH]c2cn1 | 0.0588 |
| JOB05 | Reinforcement_learning_DockStream_demo_3250 | C1NCC2NCNC2N1 | RefCore21 | c1ccc2c(c1)CN=N2 | 0.0294 |
| JOB05 | Reinforcement_learning_DockStream_demo_3253 | C1CNC2NCCC2C1 | RefCore25 | c1cc2nc[nH]c2cn1 | 0.0588 |
| JOB05 | Reinforcement_learning_DockStream_demo_3254 | C1CNC2NCCC2C1 | RefCore25 | c1cc2nc[nH]c2cn1 | 0.0588 |
| JOB05 | Reinforcement_learning_DockStream_demo_3255 | C1CC2CNCNC2N1 | RefCore25 | c1cc2nc[nH]c2cn1 | 0.0541 |
| JOB05 | Reinforcement_learning_DockStream_demo_3256 | c1ccc2nccnc2c1 | RefCore48 | c1ccn2nccc2c1 | 0.5789 |
| JOB05 | Reinforcement_learning_DockStream_demo_3258 | C1CNC2NCCC2C1 | RefCore25 | c1cc2nc[nH]c2cn1 | 0.0588 |
| JOB05 | Reinforcement_learning_DockStream_demo_3259 | C1CNC2NCCC2C1 | RefCore25 | c1cc2nc[nH]c2cn1 | 0.0588 |
| JOB05 | Reinforcement_learning_DockStream_demo_3262 | C1CNC2NCCC2C1 | RefCore25 | c1cc2nc[nH]c2cn1 | 0.0588 |
| JOB05 | Reinforcement_learning_DockStream_demo_3265 | C1CNC2NCCC2C1 | RefCore25 | c1cc2nc[nH]c2cn1 | 0.0588 |
| JOB05 | Reinforcement_learning_DockStream_demo_3268 | C1CNC2NCCC2C1 | RefCore25 | c1cc2nc[nH]c2cn1 | 0.0588 |
| JOB05 | Reinforcement_learning_DockStream_demo_327 | c1ccn2nc3c(c2c1)CCCNC3 | RefCore10 | C1=Nc2nccnc2C1 | 0.2683 |
| JOB05 | Reinforcement_learning_DockStream_demo_3271 | C1CCC2NNCC2C1 | RefCore21 | c1ccc2c(c1)CN=N2 | 0.0286 |
| JOB05 | Reinforcement_learning_DockStream_demo_3272 | C1CCC2NNCC2C1 | RefCore21 | c1ccc2c(c1)CN=N2 | 0.0286 |
| JOB05 | Reinforcement_learning_DockStream_demo_3275 | C1CNC2NCCC2C1 | RefCore25 | c1cc2nc[nH]c2cn1 | 0.0588 |
| JOB05 | Reinforcement_learning_DockStream_demo_3276 | C1CNC2NCCC2C1 | RefCore25 | c1cc2nc[nH]c2cn1 | 0.0588 |
| JOB05 | Reinforcement_learning_DockStream_demo_3280 | C1C[C@@H]2C[C@@H]2CN1 | RefCore21 | c1ccc2c(c1)CN=N2 | 0.0303 |
| JOB05 | Reinforcement_learning_DockStream_demo_3283 | C1CNC2NCCC2C1 | RefCore25 | c1cc2nc[nH]c2cn1 | 0.0588 |
| JOB05 | Reinforcement_learning_DockStream_demo_3288 | C1CNC2NCCC2C1 | RefCore25 | c1cc2nc[nH]c2cn1 | 0.0588 |
| JOB05 | Reinforcement_learning_DockStream_demo_329 | c1ccn2nc3c(c2c1)CCCNC3 | RefCore10 | C1=Nc2nccnc2C1 | 0.2683 |
| JOB05 | Reinforcement_learning_DockStream_demo_3290 | C1CNC2NCCC2C1 | RefCore25 | c1cc2nc[nH]c2cn1 | 0.0588 |
| JOB05 | Reinforcement_learning_DockStream_demo_3291 | C1CNC2NCCC2C1 | RefCore25 | c1cc2nc[nH]c2cn1 | 0.0588 |
| JOB05 | Reinforcement_learning_DockStream_demo_3297 | C1CNC2NCCC2C1 | RefCore25 | c1cc2nc[nH]c2cn1 | 0.0588 |
| JOB05 | Reinforcement_learning_DockStream_demo_3303 | c1ccc2nc3ncccc3cc2c1 | RefCore48 | c1ccn2nccc2c1 | 0.5385 |
| JOB05 | Reinforcement_learning_DockStream_demo_3305 | C1CNC2NCCC2C1 | RefCore25 | c1cc2nc[nH]c2cn1 | 0.0588 |
| JOB05 | Reinforcement_learning_DockStream_demo_3309 | C1CNC2NCCC2C1 | RefCore25 | c1cc2nc[nH]c2cn1 | 0.0588 |
| JOB05 | Reinforcement_learning_DockStream_demo_3314 | C1CNC2NCCC2C1 | RefCore25 | c1cc2nc[nH]c2cn1 | 0.0588 |
| JOB05 | Reinforcement_learning_DockStream_demo_332 | c1ccc2ncncc2c1 | RefCore48 | c1ccn2nccc2c1 | 0.4800 |
| JOB05 | Reinforcement_learning_DockStream_demo_3323 | C1CNC2NCCC2C1 | RefCore25 | c1cc2nc[nH]c2cn1 | 0.0588 |
| JOB05 | Reinforcement_learning_DockStream_demo_3324 | C1CNC2NCCC2C1 | RefCore25 | c1cc2nc[nH]c2cn1 | 0.0588 |
| JOB05 | Reinforcement_learning_DockStream_demo_3327 | C1CNC2NCCC2C1 | RefCore25 | c1cc2nc[nH]c2cn1 | 0.0588 |
| JOB05 | Reinforcement_learning_DockStream_demo_3328 | C1CNC2NCCC2C1 | RefCore25 | c1cc2nc[nH]c2cn1 | 0.0588 |
| JOB05 | Reinforcement_learning_DockStream_demo_3329 | C1CCC2NNCC2C1 | RefCore21 | c1ccc2c(c1)CN=N2 | 0.0286 |
| JOB05 | Reinforcement_learning_DockStream_demo_3332 | C1CNC2NCCC2C1 | RefCore25 | c1cc2nc[nH]c2cn1 | 0.0588 |
| JOB05 | Reinforcement_learning_DockStream_demo_3334 | C1CNC2NCCC2C1 | RefCore25 | c1cc2nc[nH]c2cn1 | 0.0588 |
| JOB05 | Reinforcement_learning_DockStream_demo_3335 | C1CCC2C(C1)NC1CCNCC12 | RefCore21 | c1ccc2c(c1)CN=N2 | 0.0256 |
| JOB05 | Reinforcement_learning_DockStream_demo_3338 | C1CNC2NCCC2C1 | RefCore25 | c1cc2nc[nH]c2cn1 | 0.0588 |
| JOB05 | Reinforcement_learning_DockStream_demo_3341 | C1CC2CNNC2CN1 | RefCore21 | c1ccc2c(c1)CN=N2 | 0.0270 |
| JOB05 | Reinforcement_learning_DockStream_demo_3342 | C1CNC2NCCC2C1 | RefCore25 | c1cc2nc[nH]c2cn1 | 0.0588 |
| JOB05 | Reinforcement_learning_DockStream_demo_3345 | C1CNC2NCCC2C1 | RefCore25 | c1cc2nc[nH]c2cn1 | 0.0588 |
| JOB05 | Reinforcement_learning_DockStream_demo_3346 | C1C[C@H]2C[C@@H]2CN1 | RefCore21 | c1ccc2c(c1)CN=N2 | 0.0303 |
| JOB05 | Reinforcement_learning_DockStream_demo_3348 | C1CNC2NCCC2C1 | RefCore25 | c1cc2nc[nH]c2cn1 | 0.0588 |
| JOB05 | Reinforcement_learning_DockStream_demo_335 | c1ccn2nc3c(c2c1)CCNC3 | RefCore10 | C1=Nc2nccnc2C1 | 0.2821 |
| JOB05 | Reinforcement_learning_DockStream_demo_3350 | C1CNC2NCCC2C1 | RefCore25 | c1cc2nc[nH]c2cn1 | 0.0588 |
| JOB05 | Reinforcement_learning_DockStream_demo_3351 | C1CNC2NCCC2C1 | RefCore25 | c1cc2nc[nH]c2cn1 | 0.0588 |
| JOB05 | Reinforcement_learning_DockStream_demo_3352 | C1CNC2NCCC2C1 | RefCore25 | c1cc2nc[nH]c2cn1 | 0.0588 |
| JOB05 | Reinforcement_learning_DockStream_demo_3357 | C1CNC2NCCC2C1 | RefCore25 | c1cc2nc[nH]c2cn1 | 0.0588 |
| JOB05 | Reinforcement_learning_DockStream_demo_3361 | C1CNC2NCCC2C1 | RefCore25 | c1cc2nc[nH]c2cn1 | 0.0588 |
| JOB05 | Reinforcement_learning_DockStream_demo_3366 | C1CNC2NCCC2C1 | RefCore25 | c1cc2nc[nH]c2cn1 | 0.0588 |
| JOB05 | Reinforcement_learning_DockStream_demo_3372 | C1CNC2NCCC2C1 | RefCore25 | c1cc2nc[nH]c2cn1 | 0.0588 |
| JOB05 | Reinforcement_learning_DockStream_demo_3373 | C1CNC2NCCC2C1 | RefCore25 | c1cc2nc[nH]c2cn1 | 0.0588 |
| JOB05 | Reinforcement_learning_DockStream_demo_3374 | C1CNC2NCCC2C1 | RefCore25 | c1cc2nc[nH]c2cn1 | 0.0588 |
| JOB05 | Reinforcement_learning_DockStream_demo_3379 | C1CNC2NCCC2C1 | RefCore25 | c1cc2nc[nH]c2cn1 | 0.0588 |
| JOB05 | Reinforcement_learning_DockStream_demo_338 | c1ccn2nc3c(c2c1)CCC[NH2+]C3 | RefCore10 | C1=Nc2nccnc2C1 | 0.2683 |
| JOB05 | Reinforcement_learning_DockStream_demo_3380 | C1CNC2NCCC2C1 | RefCore25 | c1cc2nc[nH]c2cn1 | 0.0588 |
| JOB05 | Reinforcement_learning_DockStream_demo_3385 | c1ccc2nccnc2c1 | RefCore48 | c1ccn2nccc2c1 | 0.5789 |
| JOB05 | Reinforcement_learning_DockStream_demo_3395 | C1CNC2NCCC2C1 | RefCore25 | c1cc2nc[nH]c2cn1 | 0.0588 |
| JOB05 | Reinforcement_learning_DockStream_demo_3397 | C1CNC2NCCC2C1 | RefCore25 | c1cc2nc[nH]c2cn1 | 0.0588 |
| JOB05 | Reinforcement_learning_DockStream_demo_3398 | C1CNC2NCCC2C1 | RefCore25 | c1cc2nc[nH]c2cn1 | 0.0588 |
| JOB05 | Reinforcement_learning_DockStream_demo_3399 | C1CNC2NCCC2C1 | RefCore25 | c1cc2nc[nH]c2cn1 | 0.0588 |
| JOB05 | Reinforcement_learning_DockStream_demo_3401 | C1CNC2NCCC2C1 | RefCore25 | c1cc2nc[nH]c2cn1 | 0.0588 |
| JOB05 | Reinforcement_learning_DockStream_demo_3405 | C1CNC2NCCC2C1 | RefCore25 | c1cc2nc[nH]c2cn1 | 0.0588 |
| JOB05 | Reinforcement_learning_DockStream_demo_3408 | C1NC[C@H]2C[C@@H]12 | RefCore21 | c1ccc2c(c1)CN=N2 | 0.0357 |
| JOB05 | Reinforcement_learning_DockStream_demo_3413 | c1ccc2c[nH+]ccc2c1 | RefCore48 | c1ccn2nccc2c1 | 0.2593 |
| JOB05 | Reinforcement_learning_DockStream_demo_3414 | C1CNC2NCCC2C1 | RefCore25 | c1cc2nc[nH]c2cn1 | 0.0588 |
| JOB05 | Reinforcement_learning_DockStream_demo_3418 | c1ccc2cnccc2c1 | RefCore2 | c1ncc2cn[nH]c2n1 | 0.4074 |
| JOB05 | Reinforcement_learning_DockStream_demo_3431 | C1CNC2NCCC2C1 | RefCore25 | c1cc2nc[nH]c2cn1 | 0.0588 |
| JOB05 | Reinforcement_learning_DockStream_demo_3436 | C1CCC2OCCCC2C1 | RefCore37 | C1=Cc2ccccc2[N]1 | 0.0606 |
| JOB05 | Reinforcement_learning_DockStream_demo_3437 | C1CNC2NCCC2C1 | RefCore25 | c1cc2nc[nH]c2cn1 | 0.0588 |
| JOB05 | Reinforcement_learning_DockStream_demo_3443 | c1ccc2occc2c1 | RefCore32 | C1=NCc2ccccc21 | 0.3000 |
| JOB05 | Reinforcement_learning_DockStream_demo_3448 | C1CCC2OCCCC2C1 | RefCore37 | C1=Cc2ccccc2[N]1 | 0.0606 |
| JOB05 | Reinforcement_learning_DockStream_demo_3450 | C1N[C@H]2C[C@@H]1C2 | RefCore37 | C1=Cc2ccccc2[N]1 | 0.0690 |
| JOB05 | Reinforcement_learning_DockStream_demo_3453 | C1CNC2NCCC2C1 | RefCore25 | c1cc2nc[nH]c2cn1 | 0.0588 |
| JOB05 | Reinforcement_learning_DockStream_demo_3456 | C1CNC2NCCC2C1 | RefCore25 | c1cc2nc[nH]c2cn1 | 0.0588 |
| JOB05 | Reinforcement_learning_DockStream_demo_3458 | C1CNC2NCCC2C1 | RefCore25 | c1cc2nc[nH]c2cn1 | 0.0588 |
| JOB05 | Reinforcement_learning_DockStream_demo_3460 | C1CNC2NCCC2C1 | RefCore25 | c1cc2nc[nH]c2cn1 | 0.0588 |
| JOB05 | Reinforcement_learning_DockStream_demo_3468 | C1CNC2NCCC2C1 | RefCore25 | c1cc2nc[nH]c2cn1 | 0.0588 |
| JOB05 | Reinforcement_learning_DockStream_demo_3470 | c1cnc2ccsc2c1 | RefCore48 | c1ccn2nccc2c1 | 0.4074 |
| JOB05 | Reinforcement_learning_DockStream_demo_3471 | C1CNC2NCCC2C1 | RefCore25 | c1cc2nc[nH]c2cn1 | 0.0588 |
| JOB05 | Reinforcement_learning_DockStream_demo_3473 | C1CNC2NCCC2C1 | RefCore25 | c1cc2nc[nH]c2cn1 | 0.0588 |
| JOB05 | Reinforcement_learning_DockStream_demo_3479 | C1CNC2NCCC2C1 | RefCore25 | c1cc2nc[nH]c2cn1 | 0.0588 |
| JOB05 | Reinforcement_learning_DockStream_demo_3480 | C1CNC2NCCC2C1 | RefCore25 | c1cc2nc[nH]c2cn1 | 0.0588 |
| JOB05 | Reinforcement_learning_DockStream_demo_3483 | C1CNC2NNCC2C1 | RefCore21 | c1ccc2c(c1)CN=N2 | 0.0263 |
| JOB05 | Reinforcement_learning_DockStream_demo_3484 | C1C[C@H]2C[C@H](C2)N1 | RefCore21 | c1ccc2c(c1)CN=N2 | 0.0313 |
| JOB05 | Reinforcement_learning_DockStream_demo_3487 | C1CNC2NCCC2C1 | RefCore25 | c1cc2nc[nH]c2cn1 | 0.0588 |
| JOB05 | Reinforcement_learning_DockStream_demo_3488 | C1CNC2NCCC2C1 | RefCore25 | c1cc2nc[nH]c2cn1 | 0.0588 |
| JOB05 | Reinforcement_learning_DockStream_demo_3492 | C1CCC2NCNC2C1 | RefCore37 | C1=Cc2ccccc2[N]1 | 0.0690 |
| JOB05 | Reinforcement_learning_DockStream_demo_3499 | C1CNC2NCCC2C1 | RefCore25 | c1cc2nc[nH]c2cn1 | 0.0588 |
| JOB05 | Reinforcement_learning_DockStream_demo_3503 | C1CCC2NCC2NC1 | RefCore37 | C1=Cc2ccccc2[N]1 | 0.0588 |
| JOB05 | Reinforcement_learning_DockStream_demo_3504 | C1CNC2NCCC2C1 | RefCore25 | c1cc2nc[nH]c2cn1 | 0.0588 |
| JOB05 | Reinforcement_learning_DockStream_demo_3505 | C1CNC2NCCC2C1 | RefCore25 | c1cc2nc[nH]c2cn1 | 0.0588 |
| JOB05 | Reinforcement_learning_DockStream_demo_3515 | C1C[C@H]2C[NH2+]C[C@H]2C[NH2+]1 | RefCore9 | c1ccc2[nH]cnc2c1 | 0.0625 |
| JOB05 | Reinforcement_learning_DockStream_demo_3516 | C1CNC2NNCC2C1 | RefCore21 | c1ccc2c(c1)CN=N2 | 0.0263 |
| JOB05 | Reinforcement_learning_DockStream_demo_3519 | c1ccc2ccccc2c1 | RefCore48 | c1ccn2nccc2c1 | 0.3889 |
| JOB05 | Reinforcement_learning_DockStream_demo_352 | c1ccn2nc3c(c2c1)CCCNC3 | RefCore10 | C1=Nc2nccnc2C1 | 0.2683 |
| JOB05 | Reinforcement_learning_DockStream_demo_3521 | C1CNC2NCCC2C1 | RefCore25 | c1cc2nc[nH]c2cn1 | 0.0588 |
| JOB05 | Reinforcement_learning_DockStream_demo_3527 | C1CNC2NCCC2C1 | RefCore25 | c1cc2nc[nH]c2cn1 | 0.0588 |
| JOB05 | Reinforcement_learning_DockStream_demo_3529 | C1CNC2NCCC2C1 | RefCore25 | c1cc2nc[nH]c2cn1 | 0.0588 |
| JOB05 | Reinforcement_learning_DockStream_demo_3533 | C1CNC2NCCC2C1 | RefCore25 | c1cc2nc[nH]c2cn1 | 0.0588 |
| JOB05 | Reinforcement_learning_DockStream_demo_3535 | C1CNC2NCCC2C1 | RefCore25 | c1cc2nc[nH]c2cn1 | 0.0588 |
| JOB05 | Reinforcement_learning_DockStream_demo_3540 | C1CNC2NCCC2C1 | RefCore25 | c1cc2nc[nH]c2cn1 | 0.0588 |
| JOB05 | Reinforcement_learning_DockStream_demo_3541 | C1CNC2NCCC2C1 | RefCore25 | c1cc2nc[nH]c2cn1 | 0.0588 |
| JOB05 | Reinforcement_learning_DockStream_demo_3543 | C1CNC2NCCC2C1 | RefCore25 | c1cc2nc[nH]c2cn1 | 0.0588 |
| JOB05 | Reinforcement_learning_DockStream_demo_3548 | C1CNC2NCCC2C1 | RefCore25 | c1cc2nc[nH]c2cn1 | 0.0588 |
| JOB05 | Reinforcement_learning_DockStream_demo_3549 | C1CNC2NCCC2C1 | RefCore25 | c1cc2nc[nH]c2cn1 | 0.0588 |
| JOB05 | Reinforcement_learning_DockStream_demo_355 | c1ccn2nc3c(c2c1)CCC[NH2+]C3 | RefCore10 | C1=Nc2nccnc2C1 | 0.2683 |
| JOB05 | Reinforcement_learning_DockStream_demo_3556 | C1CNC2NCCC2C1 | RefCore25 | c1cc2nc[nH]c2cn1 | 0.0588 |
| JOB05 | Reinforcement_learning_DockStream_demo_3558 | C1CNC2NCCC2C1 | RefCore25 | c1cc2nc[nH]c2cn1 | 0.0588 |
| JOB05 | Reinforcement_learning_DockStream_demo_3560 | c1ccn2nc3c(c2c1)CCNC3 | RefCore10 | C1=Nc2nccnc2C1 | 0.2821 |
| JOB05 | Reinforcement_learning_DockStream_demo_3562 | C1CNC2NCCC2C1 | RefCore25 | c1cc2nc[nH]c2cn1 | 0.0588 |
| JOB05 | Reinforcement_learning_DockStream_demo_3565 | C1CNC2NCCC2C1 | RefCore25 | c1cc2nc[nH]c2cn1 | 0.0588 |
| JOB05 | Reinforcement_learning_DockStream_demo_357 | c1ccc2c(c1)CCOC21CCNCC1 | RefCore30 | c1cc2c(nn1)N=NC2 | 0.2308 |
| JOB05 | Reinforcement_learning_DockStream_demo_3571 | C1CNC2NCCC2C1 | RefCore25 | c1cc2nc[nH]c2cn1 | 0.0588 |
| JOB05 | Reinforcement_learning_DockStream_demo_3572 | C1CNC2NCCC2C1 | RefCore25 | c1cc2nc[nH]c2cn1 | 0.0588 |
| JOB05 | Reinforcement_learning_DockStream_demo_3573 | C1CNC2NCCC2C1 | RefCore25 | c1cc2nc[nH]c2cn1 | 0.0588 |
| JOB05 | Reinforcement_learning_DockStream_demo_3575 | c1nncc2c1CCCC2 | RefCore5 | c1cc2cncnn2c1 | 0.2000 |
| JOB05 | Reinforcement_learning_DockStream_demo_3576 | C1CNC2NCCC2C1 | RefCore25 | c1cc2nc[nH]c2cn1 | 0.0588 |
| JOB05 | Reinforcement_learning_DockStream_demo_3579 | C1CNC2NCCC2C1 | RefCore25 | c1cc2nc[nH]c2cn1 | 0.0588 |
| JOB05 | Reinforcement_learning_DockStream_demo_3582 | C1CCC2NCCC2C1 | RefCore21 | c1ccc2c(c1)CN=N2 | 0.0294 |
| JOB05 | Reinforcement_learning_DockStream_demo_3585 | C1CNC2NCCC2C1 | RefCore25 | c1cc2nc[nH]c2cn1 | 0.0588 |
| JOB05 | Reinforcement_learning_DockStream_demo_3589 | C1CNC2NCCC2C1 | RefCore25 | c1cc2nc[nH]c2cn1 | 0.0588 |
| JOB05 | Reinforcement_learning_DockStream_demo_3592 | C1CCC2NNCC2C1 | RefCore21 | c1ccc2c(c1)CN=N2 | 0.0286 |
| JOB05 | Reinforcement_learning_DockStream_demo_3593 | C1CNC2NCCC2C1 | RefCore25 | c1cc2nc[nH]c2cn1 | 0.0588 |
| JOB05 | Reinforcement_learning_DockStream_demo_3597 | C1CNC2NCCC2C1 | RefCore25 | c1cc2nc[nH]c2cn1 | 0.0588 |
| JOB05 | Reinforcement_learning_DockStream_demo_3601 | C1CNC2NCCC2C1 | RefCore25 | c1cc2nc[nH]c2cn1 | 0.0588 |
| JOB05 | Reinforcement_learning_DockStream_demo_3602 | C1CNC2NCCC2C1 | RefCore25 | c1cc2nc[nH]c2cn1 | 0.0588 |
| JOB05 | Reinforcement_learning_DockStream_demo_3607 | C1CNC2NCCC2C1 | RefCore25 | c1cc2nc[nH]c2cn1 | 0.0588 |
| JOB05 | Reinforcement_learning_DockStream_demo_3609 | C1CNC2NCCC2C1 | RefCore25 | c1cc2nc[nH]c2cn1 | 0.0588 |
| JOB05 | Reinforcement_learning_DockStream_demo_3618 | C1CCC2NCCC2C1 | RefCore21 | c1ccc2c(c1)CN=N2 | 0.0294 |
| JOB05 | Reinforcement_learning_DockStream_demo_362 | c1ccn2nc3c(c2c1)CCC[NH2+]C3 | RefCore10 | C1=Nc2nccnc2C1 | 0.2683 |
| JOB05 | Reinforcement_learning_DockStream_demo_3630 | C1CNC2NCCC2C1 | RefCore25 | c1cc2nc[nH]c2cn1 | 0.0588 |
| JOB05 | Reinforcement_learning_DockStream_demo_3631 | C1CNC2NCCC2C1 | RefCore25 | c1cc2nc[nH]c2cn1 | 0.0588 |
| JOB05 | Reinforcement_learning_DockStream_demo_3633 | C1CNC2NCCC2C1 | RefCore25 | c1cc2nc[nH]c2cn1 | 0.0588 |
| JOB05 | Reinforcement_learning_DockStream_demo_3636 | C1CNC2NCCC2C1 | RefCore25 | c1cc2nc[nH]c2cn1 | 0.0588 |
| JOB05 | Reinforcement_learning_DockStream_demo_364 | c1ccn2nc3c(c2c1)CCNC3 | RefCore10 | C1=Nc2nccnc2C1 | 0.2821 |
| JOB05 | Reinforcement_learning_DockStream_demo_3640 | C1CNC2NCCC2C1 | RefCore25 | c1cc2nc[nH]c2cn1 | 0.0588 |
| JOB05 | Reinforcement_learning_DockStream_demo_3644 | C1CNC2NCCC2C1 | RefCore25 | c1cc2nc[nH]c2cn1 | 0.0588 |
| JOB05 | Reinforcement_learning_DockStream_demo_3645 | C1CNC2NCCC2C1 | RefCore25 | c1cc2nc[nH]c2cn1 | 0.0588 |
| JOB05 | Reinforcement_learning_DockStream_demo_3646 | C1CNC2NCCC2C1 | RefCore25 | c1cc2nc[nH]c2cn1 | 0.0588 |
| JOB05 | Reinforcement_learning_DockStream_demo_3647 | C1CNC2NCCC2C1 | RefCore25 | c1cc2nc[nH]c2cn1 | 0.0588 |
| JOB05 | Reinforcement_learning_DockStream_demo_3652 | C1CNC2NCCC2C1 | RefCore25 | c1cc2nc[nH]c2cn1 | 0.0588 |
| JOB05 | Reinforcement_learning_DockStream_demo_3653 | C1CNC2NCCC2C1 | RefCore25 | c1cc2nc[nH]c2cn1 | 0.0588 |
| JOB05 | Reinforcement_learning_DockStream_demo_3654 | C1CCC2NNCC2C1 | RefCore21 | c1ccc2c(c1)CN=N2 | 0.0286 |
| JOB05 | Reinforcement_learning_DockStream_demo_3655 | C1CNC2NCCC2C1 | RefCore25 | c1cc2nc[nH]c2cn1 | 0.0588 |
| JOB05 | Reinforcement_learning_DockStream_demo_3659 | C1CCC2NNCC2C1 | RefCore21 | c1ccc2c(c1)CN=N2 | 0.0286 |
| JOB05 | Reinforcement_learning_DockStream_demo_3662 | C1CNC2NCCC2C1 | RefCore25 | c1cc2nc[nH]c2cn1 | 0.0588 |
| JOB05 | Reinforcement_learning_DockStream_demo_3667 | C1CNC2NCCC2C1 | RefCore25 | c1cc2nc[nH]c2cn1 | 0.0588 |
| JOB05 | Reinforcement_learning_DockStream_demo_3670 | C1CNC2NCCC2C1 | RefCore25 | c1cc2nc[nH]c2cn1 | 0.0588 |
| JOB05 | Reinforcement_learning_DockStream_demo_3675 | C1CNC2NCCC2C1 | RefCore25 | c1cc2nc[nH]c2cn1 | 0.0588 |
| JOB05 | Reinforcement_learning_DockStream_demo_3682 | C1CNC2NCCC2C1 | RefCore25 | c1cc2nc[nH]c2cn1 | 0.0588 |
| JOB05 | Reinforcement_learning_DockStream_demo_3685 | C1CNC2CNNC2C1 | RefCore9 | c1ccc2[nH]cnc2c1 | 0.0541 |
| JOB05 | Reinforcement_learning_DockStream_demo_3689 | C1CNC2NCCC2C1 | RefCore25 | c1cc2nc[nH]c2cn1 | 0.0588 |
| JOB05 | Reinforcement_learning_DockStream_demo_3691 | C1CNC2NCCC2C1 | RefCore25 | c1cc2nc[nH]c2cn1 | 0.0588 |
| JOB05 | Reinforcement_learning_DockStream_demo_3695 | C1CNC2NCCC2C1 | RefCore25 | c1cc2nc[nH]c2cn1 | 0.0588 |
| JOB05 | Reinforcement_learning_DockStream_demo_3697 | C1CNC2NCCC2C1 | RefCore25 | c1cc2nc[nH]c2cn1 | 0.0588 |
| JOB05 | Reinforcement_learning_DockStream_demo_370 | c1ccn2nc3c(c2c1)CC[NH2+]C3 | RefCore10 | C1=Nc2nccnc2C1 | 0.2821 |
| JOB05 | Reinforcement_learning_DockStream_demo_3703 | C1CNC2NCCC2C1 | RefCore25 | c1cc2nc[nH]c2cn1 | 0.0588 |
| JOB05 | Reinforcement_learning_DockStream_demo_3706 | C1CNC2NCCC2C1 | RefCore25 | c1cc2nc[nH]c2cn1 | 0.0588 |
| JOB05 | Reinforcement_learning_DockStream_demo_371 | c1ccn2nc3c(c2c1)CCCNC3 | RefCore10 | C1=Nc2nccnc2C1 | 0.2683 |
| JOB05 | Reinforcement_learning_DockStream_demo_3718 | C1CNC2NCCC2C1 | RefCore25 | c1cc2nc[nH]c2cn1 | 0.0588 |
| JOB05 | Reinforcement_learning_DockStream_demo_372 | c1ccn2nc3c(c2c1)CC[NH2+][C@@H]1CCC[C@H]31 | RefCore10 | C1=Nc2nccnc2C1 | 0.2609 |
| JOB05 | Reinforcement_learning_DockStream_demo_3721 | c1ccc2ccccc2c1 | RefCore48 | c1ccn2nccc2c1 | 0.3889 |
| JOB05 | Reinforcement_learning_DockStream_demo_3722 | C1CCC2NCCC2C1 | RefCore21 | c1ccc2c(c1)CN=N2 | 0.0294 |
| JOB05 | Reinforcement_learning_DockStream_demo_3723 | C1CNC2NCCC2C1 | RefCore25 | c1cc2nc[nH]c2cn1 | 0.0588 |
| JOB05 | Reinforcement_learning_DockStream_demo_3724 | C1CNC2NCCC2C1 | RefCore25 | c1cc2nc[nH]c2cn1 | 0.0588 |
| JOB05 | Reinforcement_learning_DockStream_demo_3733 | C1CNC2NCCC2C1 | RefCore25 | c1cc2nc[nH]c2cn1 | 0.0588 |
| JOB05 | Reinforcement_learning_DockStream_demo_3734 | C1CC2NCNC2CN1 | RefCore37 | C1=Cc2ccccc2[N]1 | 0.0588 |
| JOB05 | Reinforcement_learning_DockStream_demo_3735 | C1N[C@H]2C[C@@H]1C2 | RefCore37 | C1=Cc2ccccc2[N]1 | 0.0690 |
| JOB05 | Reinforcement_learning_DockStream_demo_3739 | C1CNC2NCCC2C1 | RefCore25 | c1cc2nc[nH]c2cn1 | 0.0588 |
| JOB05 | Reinforcement_learning_DockStream_demo_375 | c1ccn2nc3c(c2c1)CC[NH2+]CC3 | RefCore10 | C1=Nc2nccnc2C1 | 0.2895 |
| JOB05 | Reinforcement_learning_DockStream_demo_3750 | C1CNC2NCCC2C1 | RefCore25 | c1cc2nc[nH]c2cn1 | 0.0588 |
| JOB05 | Reinforcement_learning_DockStream_demo_3751 | C1CNC2NNCC2C1 | RefCore21 | c1ccc2c(c1)CN=N2 | 0.0263 |
| JOB05 | Reinforcement_learning_DockStream_demo_3752 | C1CNC2NCCC2C1 | RefCore25 | c1cc2nc[nH]c2cn1 | 0.0588 |
| JOB05 | Reinforcement_learning_DockStream_demo_3755 | C1CNC2NCCC2C1 | RefCore25 | c1cc2nc[nH]c2cn1 | 0.0588 |
| JOB05 | Reinforcement_learning_DockStream_demo_3756 | c1cnc2ncccc2c1 | RefCore48 | c1ccn2nccc2c1 | 0.5238 |
| JOB05 | Reinforcement_learning_DockStream_demo_3757 | C1CNC2NCCC2C1 | RefCore25 | c1cc2nc[nH]c2cn1 | 0.0588 |
| JOB05 | Reinforcement_learning_DockStream_demo_3765 | C1CNC2NNCC2C1 | RefCore21 | c1ccc2c(c1)CN=N2 | 0.0263 |
| JOB05 | Reinforcement_learning_DockStream_demo_3777 | C1CNC2NCCC2C1 | RefCore25 | c1cc2nc[nH]c2cn1 | 0.0588 |
| JOB05 | Reinforcement_learning_DockStream_demo_3780 | C1CNC2NCCC2C1 | RefCore25 | c1cc2nc[nH]c2cn1 | 0.0588 |
| JOB05 | Reinforcement_learning_DockStream_demo_3781 | C1CCC2C(C1)NCC1NNNC12 | RefCore21 | c1ccc2c(c1)CN=N2 | 0.0244 |
| JOB05 | Reinforcement_learning_DockStream_demo_3782 | c1cnc2ncccc2c1 | RefCore48 | c1ccn2nccc2c1 | 0.5238 |
| JOB05 | Reinforcement_learning_DockStream_demo_3789 | c1ccc2nccnc2c1 | RefCore48 | c1ccn2nccc2c1 | 0.5789 |
| JOB05 | Reinforcement_learning_DockStream_demo_3791 | C1CNC2NCCC2C1 | RefCore25 | c1cc2nc[nH]c2cn1 | 0.0588 |
| JOB05 | Reinforcement_learning_DockStream_demo_3797 | C1CNC2NCCC2C1 | RefCore25 | c1cc2nc[nH]c2cn1 | 0.0588 |
| JOB05 | Reinforcement_learning_DockStream_demo_3799 | C1CNC2NCCC2C1 | RefCore25 | c1cc2nc[nH]c2cn1 | 0.0588 |
| JOB05 | Reinforcement_learning_DockStream_demo_3803 | C1CC2CNNC2CN1 | RefCore21 | c1ccc2c(c1)CN=N2 | 0.0270 |
| JOB05 | Reinforcement_learning_DockStream_demo_3804 | C1CNC2NCCC2C1 | RefCore25 | c1cc2nc[nH]c2cn1 | 0.0588 |
| JOB05 | Reinforcement_learning_DockStream_demo_3805 | C1CC[C@H]2CNCC[C@@H]2C1 | RefCore9 | c1ccc2[nH]cnc2c1 | 0.0588 |
| JOB05 | Reinforcement_learning_DockStream_demo_3806 | C1CNC2NCCC2C1 | RefCore25 | c1cc2nc[nH]c2cn1 | 0.0588 |
| JOB05 | Reinforcement_learning_DockStream_demo_3812 | C1CNC2NCCC2C1 | RefCore25 | c1cc2nc[nH]c2cn1 | 0.0588 |
| JOB05 | Reinforcement_learning_DockStream_demo_3817 | C1CNC2NCCC2C1 | RefCore25 | c1cc2nc[nH]c2cn1 | 0.0588 |
| JOB05 | Reinforcement_learning_DockStream_demo_3818 | C1CNC2NCCC2C1 | RefCore25 | c1cc2nc[nH]c2cn1 | 0.0588 |
| JOB05 | Reinforcement_learning_DockStream_demo_3823 | C1CNC2NCCC2C1 | RefCore25 | c1cc2nc[nH]c2cn1 | 0.0588 |
| JOB05 | Reinforcement_learning_DockStream_demo_3827 | c1ccc2cnccc2c1 | RefCore2 | c1ncc2cn[nH]c2n1 | 0.4074 |
| JOB05 | Reinforcement_learning_DockStream_demo_3828 | C1CNC2NCCC2C1 | RefCore25 | c1cc2nc[nH]c2cn1 | 0.0588 |
| JOB05 | Reinforcement_learning_DockStream_demo_3842 | C1CNC2NCCC2C1 | RefCore25 | c1cc2nc[nH]c2cn1 | 0.0588 |
| JOB05 | Reinforcement_learning_DockStream_demo_3845 | C1CCC2NNCC2C1 | RefCore21 | c1ccc2c(c1)CN=N2 | 0.0286 |
| JOB05 | Reinforcement_learning_DockStream_demo_3848 | C1CNC2NCCC2C1 | RefCore25 | c1cc2nc[nH]c2cn1 | 0.0588 |
| JOB05 | Reinforcement_learning_DockStream_demo_386 | c1ccc2ncncc2c1 | RefCore48 | c1ccn2nccc2c1 | 0.4800 |
| JOB05 | Reinforcement_learning_DockStream_demo_3862 | C1CNC2NCCC2C1 | RefCore25 | c1cc2nc[nH]c2cn1 | 0.0588 |
| JOB05 | Reinforcement_learning_DockStream_demo_3864 | C1CNC2NCCC2C1 | RefCore25 | c1cc2nc[nH]c2cn1 | 0.0588 |
| JOB05 | Reinforcement_learning_DockStream_demo_3866 | C1CNC2NCCC2C1 | RefCore25 | c1cc2nc[nH]c2cn1 | 0.0588 |
| JOB05 | Reinforcement_learning_DockStream_demo_3867 | C1CNC2NCCC2C1 | RefCore25 | c1cc2nc[nH]c2cn1 | 0.0588 |
| JOB05 | Reinforcement_learning_DockStream_demo_387 | c1ccn2nc3c(c2c1)CCCNC3 | RefCore10 | C1=Nc2nccnc2C1 | 0.2683 |
| JOB05 | Reinforcement_learning_DockStream_demo_3875 | C1CNC2NCCC2C1 | RefCore25 | c1cc2nc[nH]c2cn1 | 0.0588 |
| JOB05 | Reinforcement_learning_DockStream_demo_3879 | c1ncc2occc2n1 | RefCore32 | C1=NCc2ccccc21 | 0.4667 |
| JOB05 | Reinforcement_learning_DockStream_demo_3886 | C1CNC2NCCC2C1 | RefCore25 | c1cc2nc[nH]c2cn1 | 0.0588 |
| JOB05 | Reinforcement_learning_DockStream_demo_3892 | C1CNC2NCCC2C1 | RefCore25 | c1cc2nc[nH]c2cn1 | 0.0588 |
| JOB05 | Reinforcement_learning_DockStream_demo_3896 | C1CNC2NCCC2C1 | RefCore25 | c1cc2nc[nH]c2cn1 | 0.0588 |
| JOB05 | Reinforcement_learning_DockStream_demo_3909 | C1CNC2NCCC2C1 | RefCore25 | c1cc2nc[nH]c2cn1 | 0.0588 |
| JOB05 | Reinforcement_learning_DockStream_demo_391 | C1CNC2NNCC2N1 | RefCore9 | c1ccc2[nH]cnc2c1 | 0.0571 |
| JOB05 | Reinforcement_learning_DockStream_demo_3910 | C1CNC2NCCC2C1 | RefCore25 | c1cc2nc[nH]c2cn1 | 0.0588 |
| JOB05 | Reinforcement_learning_DockStream_demo_3912 | C1CNC2NNCC2C1 | RefCore21 | c1ccc2c(c1)CN=N2 | 0.0263 |
| JOB05 | Reinforcement_learning_DockStream_demo_3917 | C1CNC2NCCC2C1 | RefCore25 | c1cc2nc[nH]c2cn1 | 0.0588 |
| JOB05 | Reinforcement_learning_DockStream_demo_3918 | C1CNC2NCCC2C1 | RefCore25 | c1cc2nc[nH]c2cn1 | 0.0588 |
| JOB05 | Reinforcement_learning_DockStream_demo_3922 | C1CNC2NCCC2C1 | RefCore25 | c1cc2nc[nH]c2cn1 | 0.0588 |
| JOB05 | Reinforcement_learning_DockStream_demo_3928 | C1CNC2NCCC2C1 | RefCore25 | c1cc2nc[nH]c2cn1 | 0.0588 |
| JOB05 | Reinforcement_learning_DockStream_demo_3936 | C1CCC2NNCC2C1 | RefCore21 | c1ccc2c(c1)CN=N2 | 0.0286 |
| JOB05 | Reinforcement_learning_DockStream_demo_3937 | C1CCC2C(C1)NC1CNNCC12 | RefCore9 | c1ccc2[nH]cnc2c1 | 0.0526 |
| JOB05 | Reinforcement_learning_DockStream_demo_3938 | c1ccc2nccnc2c1 | RefCore48 | c1ccn2nccc2c1 | 0.5789 |
| JOB05 | Reinforcement_learning_DockStream_demo_3946 | C1CNC2NCCC2C1 | RefCore25 | c1cc2nc[nH]c2cn1 | 0.0588 |
| JOB05 | Reinforcement_learning_DockStream_demo_395 | c1ccn2nc3c(c2c1)CCCCN3 | RefCore10 | C1=Nc2nccnc2C1 | 0.3077 |
| JOB05 | Reinforcement_learning_DockStream_demo_3955 | C1CNC2NCCC2C1 | RefCore25 | c1cc2nc[nH]c2cn1 | 0.0588 |
| JOB05 | Reinforcement_learning_DockStream_demo_396 | c1ccc2ocnc2c1 | RefCore48 | c1ccn2nccc2c1 | 0.3333 |
| JOB05 | Reinforcement_learning_DockStream_demo_3960 | C1CNC2NNCC2C1 | RefCore21 | c1ccc2c(c1)CN=N2 | 0.0263 |
| JOB05 | Reinforcement_learning_DockStream_demo_3964 | C1CNC2NCCC2C1 | RefCore25 | c1cc2nc[nH]c2cn1 | 0.0588 |
| JOB05 | Reinforcement_learning_DockStream_demo_3965 | C1CNC2NCCC2C1 | RefCore25 | c1cc2nc[nH]c2cn1 | 0.0588 |
| JOB05 | Reinforcement_learning_DockStream_demo_3967 | C1CNC2NCCC2C1 | RefCore25 | c1cc2nc[nH]c2cn1 | 0.0588 |
| JOB05 | Reinforcement_learning_DockStream_demo_3969 | C1CNC2NCCC2C1 | RefCore25 | c1cc2nc[nH]c2cn1 | 0.0588 |
| JOB05 | Reinforcement_learning_DockStream_demo_3972 | c1ccc2ncncc2c1 | RefCore48 | c1ccn2nccc2c1 | 0.4800 |
| JOB05 | Reinforcement_learning_DockStream_demo_3977 | C1CNC2NCCC2C1 | RefCore25 | c1cc2nc[nH]c2cn1 | 0.0588 |
| JOB05 | Reinforcement_learning_DockStream_demo_3981 | c1ccc2cnccc2c1 | RefCore2 | c1ncc2cn[nH]c2n1 | 0.4074 |
| JOB05 | Reinforcement_learning_DockStream_demo_3985 | c1ccc2ccccc2c1 | RefCore48 | c1ccn2nccc2c1 | 0.3889 |
| JOB05 | Reinforcement_learning_DockStream_demo_3986 | C1CNC2NCCC2C1 | RefCore25 | c1cc2nc[nH]c2cn1 | 0.0588 |
| JOB05 | Reinforcement_learning_DockStream_demo_3994 | C1CNC2NCCC2C1 | RefCore25 | c1cc2nc[nH]c2cn1 | 0.0588 |
| JOB05 | Reinforcement_learning_DockStream_demo_4007 | C1CNC2NCCC2C1 | RefCore25 | c1cc2nc[nH]c2cn1 | 0.0588 |
| JOB05 | Reinforcement_learning_DockStream_demo_4012 | c1cnc2ccsc2c1 | RefCore48 | c1ccn2nccc2c1 | 0.4074 |
| JOB05 | Reinforcement_learning_DockStream_demo_4035 | C1CNC2NCCC2C1 | RefCore25 | c1cc2nc[nH]c2cn1 | 0.0588 |
| JOB05 | Reinforcement_learning_DockStream_demo_4037 | c1ccc2nccnc2c1 | RefCore48 | c1ccn2nccc2c1 | 0.5789 |
| JOB05 | Reinforcement_learning_DockStream_demo_4039 | C1CNC2NCCC2C1 | RefCore25 | c1cc2nc[nH]c2cn1 | 0.0588 |
| JOB05 | Reinforcement_learning_DockStream_demo_4042 | C1CNC2NCCC2C1 | RefCore25 | c1cc2nc[nH]c2cn1 | 0.0588 |
| JOB05 | Reinforcement_learning_DockStream_demo_4046 | C1CNC2NCCC2C1 | RefCore25 | c1cc2nc[nH]c2cn1 | 0.0588 |
| JOB05 | Reinforcement_learning_DockStream_demo_405 | c1ccn2nc3c(c2c1)CCCCC3 | RefCore10 | C1=Nc2nccnc2C1 | 0.3056 |
| JOB05 | Reinforcement_learning_DockStream_demo_4050 | C1CNC2NCCC2C1 | RefCore25 | c1cc2nc[nH]c2cn1 | 0.0588 |
| JOB05 | Reinforcement_learning_DockStream_demo_4051 | C1CNC2NCCC2C1 | RefCore25 | c1cc2nc[nH]c2cn1 | 0.0588 |
| JOB05 | Reinforcement_learning_DockStream_demo_4054 | C1CNC2NCCC2C1 | RefCore25 | c1cc2nc[nH]c2cn1 | 0.0588 |
| JOB05 | Reinforcement_learning_DockStream_demo_4058 | C1CNC2NCCC2C1 | RefCore25 | c1cc2nc[nH]c2cn1 | 0.0588 |
| JOB05 | Reinforcement_learning_DockStream_demo_406 | c1ccc2c(c1)OCC1CCNC21 | RefCore10 | C1=Nc2nccnc2C1 | 0.2000 |
| JOB05 | Reinforcement_learning_DockStream_demo_4070 | C1CC2C(NCC3NNNC32)S1 | RefCore21 | c1ccc2c(c1)CN=N2 | 0.0227 |
| JOB05 | Reinforcement_learning_DockStream_demo_4087 | C1CNC2NCCC2C1 | RefCore25 | c1cc2nc[nH]c2cn1 | 0.0588 |
| JOB05 | Reinforcement_learning_DockStream_demo_41 | c1ccc2c(c1)CCNC2 | RefCore6 | C1=Nc2ncccc2C1 | 0.2667 |
| JOB05 | Reinforcement_learning_DockStream_demo_4104 | C1CNC2NCCC2C1 | RefCore25 | c1cc2nc[nH]c2cn1 | 0.0588 |
| JOB05 | Reinforcement_learning_DockStream_demo_411 | c1ccn2nc3c(c2c1)CC[NH2+]C3 | RefCore10 | C1=Nc2nccnc2C1 | 0.2821 |
| JOB05 | Reinforcement_learning_DockStream_demo_4114 | C1CNC2NCCC2C1 | RefCore25 | c1cc2nc[nH]c2cn1 | 0.0588 |
| JOB05 | Reinforcement_learning_DockStream_demo_4117 | C1CNC2NCCC2C1 | RefCore25 | c1cc2nc[nH]c2cn1 | 0.0588 |
| JOB05 | Reinforcement_learning_DockStream_demo_4119 | C1CNC2NCCC2C1 | RefCore25 | c1cc2nc[nH]c2cn1 | 0.0588 |
| JOB05 | Reinforcement_learning_DockStream_demo_412 | C1CCC2NNCC2C1 | RefCore21 | c1ccc2c(c1)CN=N2 | 0.0286 |
| JOB05 | Reinforcement_learning_DockStream_demo_4120 | C1CNC2NCCC2C1 | RefCore25 | c1cc2nc[nH]c2cn1 | 0.0588 |
| JOB05 | Reinforcement_learning_DockStream_demo_4123 | C1CNC2NCCC2C1 | RefCore25 | c1cc2nc[nH]c2cn1 | 0.0588 |
| JOB05 | Reinforcement_learning_DockStream_demo_4154 | c1ccc2c(c1)ncc1cncn12 | RefCore15 | c1cnc2c(c1)CN=N2 | 0.3235 |
| JOB05 | Reinforcement_learning_DockStream_demo_4156 | C1CCC2C(C1)NC1NCCCC12 | RefCore9 | c1ccc2[nH]cnc2c1 | 0.0513 |
| JOB05 | Reinforcement_learning_DockStream_demo_4157 | C1NC[C@H]2C[C@@H]1C2 | RefCore21 | c1ccc2c(c1)CN=N2 | 0.0357 |
| JOB05 | Reinforcement_learning_DockStream_demo_4168 | c1ccc2nccnc2c1 | RefCore48 | c1ccn2nccc2c1 | 0.5789 |
| JOB05 | Reinforcement_learning_DockStream_demo_4174 | C1CNC2NCCC2C1 | RefCore25 | c1cc2nc[nH]c2cn1 | 0.0588 |
| JOB05 | Reinforcement_learning_DockStream_demo_418 | c1ccn2nc3c(c2c1)CC[NH2+]C3 | RefCore10 | C1=Nc2nccnc2C1 | 0.2821 |
| JOB05 | Reinforcement_learning_DockStream_demo_4182 | C1CNC2NCCC2C1 | RefCore25 | c1cc2nc[nH]c2cn1 | 0.0588 |
| JOB05 | Reinforcement_learning_DockStream_demo_4188 | C1CNC2NCCC2C1 | RefCore25 | c1cc2nc[nH]c2cn1 | 0.0588 |
| JOB05 | Reinforcement_learning_DockStream_demo_4191 | C1CNC2NCCC2C1 | RefCore25 | c1cc2nc[nH]c2cn1 | 0.0588 |
| JOB05 | Reinforcement_learning_DockStream_demo_4204 | C1CNC2NCCC2C1 | RefCore25 | c1cc2nc[nH]c2cn1 | 0.0588 |
| JOB05 | Reinforcement_learning_DockStream_demo_4208 | C1CNC2NCCC2C1 | RefCore25 | c1cc2nc[nH]c2cn1 | 0.0588 |
| JOB05 | Reinforcement_learning_DockStream_demo_4210 | C1CNC2NCCC2C1 | RefCore25 | c1cc2nc[nH]c2cn1 | 0.0588 |
| JOB05 | Reinforcement_learning_DockStream_demo_4214 | C1CNC2NCCC2C1 | RefCore25 | c1cc2nc[nH]c2cn1 | 0.0588 |
| JOB05 | Reinforcement_learning_DockStream_demo_4217 | C1CNC2NCCC2C1 | RefCore25 | c1cc2nc[nH]c2cn1 | 0.0588 |
| JOB05 | Reinforcement_learning_DockStream_demo_4234 | C1CNC2NNCC2C1 | RefCore21 | c1ccc2c(c1)CN=N2 | 0.0263 |
| JOB05 | Reinforcement_learning_DockStream_demo_4246 | C1CNC2NCCC2C1 | RefCore25 | c1cc2nc[nH]c2cn1 | 0.0588 |
| JOB05 | Reinforcement_learning_DockStream_demo_4249 | C1CNC2NCCC2C1 | RefCore25 | c1cc2nc[nH]c2cn1 | 0.0588 |
| JOB05 | Reinforcement_learning_DockStream_demo_425 | c1ccc2ncncc2c1 | RefCore48 | c1ccn2nccc2c1 | 0.4800 |
| JOB05 | Reinforcement_learning_DockStream_demo_4254 | C1CNC2NCCC2C1 | RefCore25 | c1cc2nc[nH]c2cn1 | 0.0588 |
| JOB05 | Reinforcement_learning_DockStream_demo_4265 | C1CCC2OCCCC2C1 | RefCore37 | C1=Cc2ccccc2[N]1 | 0.0606 |
| JOB05 | Reinforcement_learning_DockStream_demo_4271 | c1ccn2nc3c(c2c1)CCNC3 | RefCore10 | C1=Nc2nccnc2C1 | 0.2821 |
| JOB05 | Reinforcement_learning_DockStream_demo_4279 | C1CNC2NCCC2C1 | RefCore25 | c1cc2nc[nH]c2cn1 | 0.0588 |
| JOB05 | Reinforcement_learning_DockStream_demo_4280 | c1ccc2cnccc2c1 | RefCore2 | c1ncc2cn[nH]c2n1 | 0.4074 |
| JOB05 | Reinforcement_learning_DockStream_demo_4283 | C1CNC2NCCC2C1 | RefCore25 | c1cc2nc[nH]c2cn1 | 0.0588 |
| JOB05 | Reinforcement_learning_DockStream_demo_4284 | C1CNC2NCCC2C1 | RefCore25 | c1cc2nc[nH]c2cn1 | 0.0588 |
| JOB05 | Reinforcement_learning_DockStream_demo_4289 | C1C[C@H]2CC[C@H]1C2 | RefCore14 | c1cn2cncc2cn1 | 0.0714 |
| JOB05 | Reinforcement_learning_DockStream_demo_429 | c1ccn2nc3c(c2c1)CCCNC3 | RefCore10 | C1=Nc2nccnc2C1 | 0.2683 |
| JOB05 | Reinforcement_learning_DockStream_demo_4292 | C1CNC2NCCC2C1 | RefCore25 | c1cc2nc[nH]c2cn1 | 0.0588 |
| JOB05 | Reinforcement_learning_DockStream_demo_4298 | C1CCC2NCNC2C1 | RefCore37 | C1=Cc2ccccc2[N]1 | 0.0690 |
| JOB05 | Reinforcement_learning_DockStream_demo_431 | c1ccc2ncncc2c1 | RefCore48 | c1ccn2nccc2c1 | 0.4800 |
| JOB05 | Reinforcement_learning_DockStream_demo_4316 | C1CNC2NCNC2C1 | RefCore21 | c1ccc2c(c1)CN=N2 | 0.0278 |
| JOB05 | Reinforcement_learning_DockStream_demo_4329 | c1cnc2ccncc2c1 | RefCore48 | c1ccn2nccc2c1 | 0.5833 |
| JOB05 | Reinforcement_learning_DockStream_demo_4333 | C1CNC2NCCC2C1 | RefCore25 | c1cc2nc[nH]c2cn1 | 0.0588 |
| JOB05 | Reinforcement_learning_DockStream_demo_4337 | C1CNC2NCCC2C1 | RefCore25 | c1cc2nc[nH]c2cn1 | 0.0588 |
| JOB05 | Reinforcement_learning_DockStream_demo_4344 | c1ccc2nnccc2c1 | RefCore48 | c1ccn2nccc2c1 | 0.5000 |
| JOB05 | Reinforcement_learning_DockStream_demo_4346 | C1CNC2NCCC2C1 | RefCore25 | c1cc2nc[nH]c2cn1 | 0.0588 |
| JOB05 | Reinforcement_learning_DockStream_demo_4369 | c1ccc2c(c1)CCC2 | RefCore6 | C1=Nc2ncccc2C1 | 0.3333 |
| JOB05 | Reinforcement_learning_DockStream_demo_437 | c1ccn2nc3c(c2c1)CC[NH+]1CCC[C@H]1C3 | RefCore10 | C1=Nc2nccnc2C1 | 0.2609 |
| JOB05 | Reinforcement_learning_DockStream_demo_4370 | C1CNC2NCCC2C1 | RefCore25 | c1cc2nc[nH]c2cn1 | 0.0588 |
| JOB05 | Reinforcement_learning_DockStream_demo_4377 | C1CNC2NCCC2C1 | RefCore25 | c1cc2nc[nH]c2cn1 | 0.0588 |
| JOB05 | Reinforcement_learning_DockStream_demo_4378 | C1CC2CNNC2CN1 | RefCore21 | c1ccc2c(c1)CN=N2 | 0.0270 |
| JOB05 | Reinforcement_learning_DockStream_demo_4380 | C1CNC2NCCC2C1 | RefCore25 | c1cc2nc[nH]c2cn1 | 0.0588 |
| JOB05 | Reinforcement_learning_DockStream_demo_4386 | C1CNC2NCCC2C1 | RefCore25 | c1cc2nc[nH]c2cn1 | 0.0588 |
| JOB05 | Reinforcement_learning_DockStream_demo_4397 | C1CNC2NCCC2C1 | RefCore25 | c1cc2nc[nH]c2cn1 | 0.0588 |
| JOB05 | Reinforcement_learning_DockStream_demo_4399 | C1CNC2NCCC2C1 | RefCore25 | c1cc2nc[nH]c2cn1 | 0.0588 |
| JOB05 | Reinforcement_learning_DockStream_demo_44 | c1ccc2ncncc2c1 | RefCore48 | c1ccn2nccc2c1 | 0.4800 |
| JOB05 | Reinforcement_learning_DockStream_demo_4405 | C1CNC2NCCC2C1 | RefCore25 | c1cc2nc[nH]c2cn1 | 0.0588 |
| JOB05 | Reinforcement_learning_DockStream_demo_4415 | C1CNC2NCCC2C1 | RefCore25 | c1cc2nc[nH]c2cn1 | 0.0588 |
| JOB05 | Reinforcement_learning_DockStream_demo_4418 | C1CNC2NCCC2C1 | RefCore25 | c1cc2nc[nH]c2cn1 | 0.0588 |
| JOB05 | Reinforcement_learning_DockStream_demo_4420 | c1ccc2nccnc2c1 | RefCore48 | c1ccn2nccc2c1 | 0.5789 |
| JOB05 | Reinforcement_learning_DockStream_demo_4427 | C1CNC2NCCC2C1 | RefCore25 | c1cc2nc[nH]c2cn1 | 0.0588 |
| JOB05 | Reinforcement_learning_DockStream_demo_443 | c1ccn2nc3c(c2c1)C[NH2+]CC3 | RefCore10 | C1=Nc2nccnc2C1 | 0.2821 |
| JOB05 | Reinforcement_learning_DockStream_demo_4433 | C1CNC2NCCC2C1 | RefCore25 | c1cc2nc[nH]c2cn1 | 0.0588 |
| JOB05 | Reinforcement_learning_DockStream_demo_4439 | C1CNC2NCCC2C1 | RefCore25 | c1cc2nc[nH]c2cn1 | 0.0588 |
| JOB05 | Reinforcement_learning_DockStream_demo_4447 | C1CNC2NCCC2C1 | RefCore25 | c1cc2nc[nH]c2cn1 | 0.0588 |
| JOB05 | Reinforcement_learning_DockStream_demo_4449 | C1CNC2NCCC2C1 | RefCore25 | c1cc2nc[nH]c2cn1 | 0.0588 |
| JOB05 | Reinforcement_learning_DockStream_demo_4450 | C1CNC2NCCC2C1 | RefCore25 | c1cc2nc[nH]c2cn1 | 0.0588 |
| JOB05 | Reinforcement_learning_DockStream_demo_4451 | C1CNC2NCCC2C1 | RefCore25 | c1cc2nc[nH]c2cn1 | 0.0588 |
| JOB05 | Reinforcement_learning_DockStream_demo_4456 | C1CNC2NCCC2C1 | RefCore25 | c1cc2nc[nH]c2cn1 | 0.0588 |
| JOB05 | Reinforcement_learning_DockStream_demo_448 | c1ccc2ncncc2c1 | RefCore48 | c1ccn2nccc2c1 | 0.4800 |
| JOB05 | Reinforcement_learning_DockStream_demo_4486 | C1CNC2NCCC2C1 | RefCore25 | c1cc2nc[nH]c2cn1 | 0.0588 |
| JOB05 | Reinforcement_learning_DockStream_demo_4493 | C1C[C@]2(CO1)[C@@H]1C[C@H]2NC[C@H]2CC[C@H]21 | RefCore37 | C1=Cc2ccccc2[N]1 | 0.0417 |
| JOB05 | Reinforcement_learning_DockStream_demo_4498 | C1CNC2NCCC2C1 | RefCore25 | c1cc2nc[nH]c2cn1 | 0.0588 |
| JOB05 | Reinforcement_learning_DockStream_demo_4505 | C1CNC2NCCC2C1 | RefCore25 | c1cc2nc[nH]c2cn1 | 0.0588 |
| JOB05 | Reinforcement_learning_DockStream_demo_4512 | C1CNC2NCCC2C1 | RefCore25 | c1cc2nc[nH]c2cn1 | 0.0588 |
| JOB05 | Reinforcement_learning_DockStream_demo_4518 | C1CNC2NCCC2C1 | RefCore25 | c1cc2nc[nH]c2cn1 | 0.0588 |
| JOB05 | Reinforcement_learning_DockStream_demo_4525 | C1CNC2NCCC2C1 | RefCore25 | c1cc2nc[nH]c2cn1 | 0.0588 |
| JOB05 | Reinforcement_learning_DockStream_demo_4534 | c1cnc2ccncc2c1 | RefCore48 | c1ccn2nccc2c1 | 0.5833 |
| JOB05 | Reinforcement_learning_DockStream_demo_4535 | C1CNC2NNCC2C1 | RefCore21 | c1ccc2c(c1)CN=N2 | 0.0263 |
| JOB05 | Reinforcement_learning_DockStream_demo_4541 | C1[C@@H]2NC[C@H]3C[C@H](C3)[C@H]12 | RefCore21 | c1ccc2c(c1)CN=N2 | 0.0286 |
| JOB05 | Reinforcement_learning_DockStream_demo_4543 | C1CNC2NCCC2C1 | RefCore25 | c1cc2nc[nH]c2cn1 | 0.0588 |
| JOB05 | Reinforcement_learning_DockStream_demo_4550 | c1ccc2ccccc2c1 | RefCore48 | c1ccn2nccc2c1 | 0.3889 |
| JOB05 | Reinforcement_learning_DockStream_demo_4554 | C1CNC2NCCC2C1 | RefCore25 | c1cc2nc[nH]c2cn1 | 0.0588 |
| JOB05 | Reinforcement_learning_DockStream_demo_4557 | C1CNC2NCCC2C1 | RefCore25 | c1cc2nc[nH]c2cn1 | 0.0588 |
| JOB05 | Reinforcement_learning_DockStream_demo_457 | c1ccc2ocnc2c1 | RefCore48 | c1ccn2nccc2c1 | 0.3333 |
| JOB05 | Reinforcement_learning_DockStream_demo_4576 | C1CNC2NCCC2C1 | RefCore25 | c1cc2nc[nH]c2cn1 | 0.0588 |
| JOB05 | Reinforcement_learning_DockStream_demo_4593 | c1ccc2occc2c1 | RefCore32 | C1=NCc2ccccc21 | 0.3000 |
| JOB05 | Reinforcement_learning_DockStream_demo_4598 | C1CNC2NCCC2C1 | RefCore25 | c1cc2nc[nH]c2cn1 | 0.0588 |
| JOB05 | Reinforcement_learning_DockStream_demo_46 | c1ccn2nc3c(c2c1)CCC[NH2+]C3 | RefCore10 | C1=Nc2nccnc2C1 | 0.2683 |
| JOB05 | Reinforcement_learning_DockStream_demo_4600 | C1CNC2NCCC2C1 | RefCore25 | c1cc2nc[nH]c2cn1 | 0.0588 |
| JOB05 | Reinforcement_learning_DockStream_demo_4601 | C1CNC2NCCC2C1 | RefCore25 | c1cc2nc[nH]c2cn1 | 0.0588 |
| JOB05 | Reinforcement_learning_DockStream_demo_4607 | C1CNC2NCCC2C1 | RefCore25 | c1cc2nc[nH]c2cn1 | 0.0588 |
| JOB05 | Reinforcement_learning_DockStream_demo_4612 | C1CNC2NCCC2C1 | RefCore25 | c1cc2nc[nH]c2cn1 | 0.0588 |
| JOB05 | Reinforcement_learning_DockStream_demo_4620 | C1CNC2NCCC2C1 | RefCore25 | c1cc2nc[nH]c2cn1 | 0.0588 |
| JOB05 | Reinforcement_learning_DockStream_demo_4624 | C1CNC2NCCC2C1 | RefCore25 | c1cc2nc[nH]c2cn1 | 0.0588 |
| JOB05 | Reinforcement_learning_DockStream_demo_4626 | C1CCC2NNCC2C1 | RefCore21 | c1ccc2c(c1)CN=N2 | 0.0286 |
| JOB05 | Reinforcement_learning_DockStream_demo_4641 | C1CNC2NCCC2C1 | RefCore25 | c1cc2nc[nH]c2cn1 | 0.0588 |
| JOB05 | Reinforcement_learning_DockStream_demo_469 | c1ccn2nc3c(c2c1)CC[NH2+]C3 | RefCore10 | C1=Nc2nccnc2C1 | 0.2821 |
| JOB05 | Reinforcement_learning_DockStream_demo_47 | c1ccn2nc3c(c2c1)CCCNC3 | RefCore10 | C1=Nc2nccnc2C1 | 0.2683 |
| JOB05 | Reinforcement_learning_DockStream_demo_470 | c1ccn2nc3c(c2c1)CCCNC3 | RefCore10 | C1=Nc2nccnc2C1 | 0.2683 |
| JOB05 | Reinforcement_learning_DockStream_demo_48 | C1C2CC3CC1CC(C2)C3 | RefCore37 | C1=Cc2ccccc2[N]1 | 0.0435 |
| JOB05 | Reinforcement_learning_DockStream_demo_481 | c1cnc2cnccc2c1 | RefCore48 | c1ccn2nccc2c1 | 0.5833 |
| JOB05 | Reinforcement_learning_DockStream_demo_487 | c1ccn2nc3c(c2c1)CCC[NH2+]C3 | RefCore10 | C1=Nc2nccnc2C1 | 0.2683 |
| JOB05 | Reinforcement_learning_DockStream_demo_493 | c1ccn2nc3c(c2c1)CCNC3 | RefCore10 | C1=Nc2nccnc2C1 | 0.2821 |
| JOB05 | Reinforcement_learning_DockStream_demo_494 | c1ccn2nc3c(c2c1)CCNC3 | RefCore10 | C1=Nc2nccnc2C1 | 0.2821 |
| JOB05 | Reinforcement_learning_DockStream_demo_495 | c1ccc2ocnc2c1 | RefCore48 | c1ccn2nccc2c1 | 0.3333 |
| JOB05 | Reinforcement_learning_DockStream_demo_500 | c1ccc2c(c1)CCCN2 | RefCore6 | C1=Nc2ncccc2C1 | 0.2500 |
| JOB05 | Reinforcement_learning_DockStream_demo_503 | c1ccn2nc3c(c2c1)CCCC3 | RefCore10 | C1=Nc2nccnc2C1 | 0.3143 |
| JOB05 | Reinforcement_learning_DockStream_demo_507 | c1ccc2c(c1)CCCN2 | RefCore6 | C1=Nc2ncccc2C1 | 0.2500 |
| JOB05 | Reinforcement_learning_DockStream_demo_516 | c1ccc2c(c1)CCCN2 | RefCore6 | C1=Nc2ncccc2C1 | 0.2500 |
| JOB05 | Reinforcement_learning_DockStream_demo_523 | C1CCC2NNCC2C1 | RefCore21 | c1ccc2c(c1)CN=N2 | 0.0286 |
| JOB05 | Reinforcement_learning_DockStream_demo_528 | c1ccn2nc3c(c2c1)CCC[NH2+]C3 | RefCore10 | C1=Nc2nccnc2C1 | 0.2683 |
| JOB05 | Reinforcement_learning_DockStream_demo_532 | c1ccn2nc3c(c2c1)CCCNC3 | RefCore10 | C1=Nc2nccnc2C1 | 0.2683 |
| JOB05 | Reinforcement_learning_DockStream_demo_535 | c1ccn2nc3c(c2c1)CCCNC3 | RefCore10 | C1=Nc2nccnc2C1 | 0.2683 |
| JOB05 | Reinforcement_learning_DockStream_demo_537 | c1ccn2nc3c(c2c1)CCCC3 | RefCore10 | C1=Nc2nccnc2C1 | 0.3143 |
| JOB05 | Reinforcement_learning_DockStream_demo_54 | c1ccn2nc3c(c2c1)CCCNC3 | RefCore10 | C1=Nc2nccnc2C1 | 0.2683 |
| JOB05 | Reinforcement_learning_DockStream_demo_540 | c1ccn2nc3c(c2c1)CCCN3 | RefCore10 | C1=Nc2nccnc2C1 | 0.3158 |
| JOB05 | Reinforcement_learning_DockStream_demo_541 | C1=C2NCCc3c(nn4ccccc34)C2=CCC1 | RefCore10 | C1=Nc2nccnc2C1 | 0.2667 |
| JOB05 | Reinforcement_learning_DockStream_demo_548 | C1CNC2NCCC2C1 | RefCore25 | c1cc2nc[nH]c2cn1 | 0.0588 |
| JOB05 | Reinforcement_learning_DockStream_demo_55 | c1ccc2ncncc2c1 | RefCore48 | c1ccn2nccc2c1 | 0.4800 |
| JOB05 | Reinforcement_learning_DockStream_demo_552 | c1ccn2nc3c(c2c1)CCCNC3 | RefCore10 | C1=Nc2nccnc2C1 | 0.2683 |
| JOB05 | Reinforcement_learning_DockStream_demo_553 | c1ccn2nc3c(c2c1)CCCC3 | RefCore10 | C1=Nc2nccnc2C1 | 0.3143 |
| JOB05 | Reinforcement_learning_DockStream_demo_561 | c1ccc2ncncc2c1 | RefCore48 | c1ccn2nccc2c1 | 0.4800 |
| JOB05 | Reinforcement_learning_DockStream_demo_562 | c1ccn2nc3c(c2c1)C[NH2+]C3 | RefCore10 | C1=Nc2nccnc2C1 | 0.3056 |
| JOB05 | Reinforcement_learning_DockStream_demo_57 | c1ccn2nc3c(c2c1)CC[NH2+][C@@H]1CCCC[C@H]31 | RefCore10 | C1=Nc2nccnc2C1 | 0.2609 |
| JOB05 | Reinforcement_learning_DockStream_demo_574 | C1CCC2NNCC2C1 | RefCore21 | c1ccc2c(c1)CN=N2 | 0.0286 |
| JOB05 | Reinforcement_learning_DockStream_demo_582 | c1ccn2nc3c(c2c1)CCNC3 | RefCore10 | C1=Nc2nccnc2C1 | 0.2821 |
| JOB05 | Reinforcement_learning_DockStream_demo_584 | c1ccn2nc3c(c2c1)CCCNC3 | RefCore10 | C1=Nc2nccnc2C1 | 0.2683 |
| JOB05 | Reinforcement_learning_DockStream_demo_586 | c1ccc2ocnc2c1 | RefCore48 | c1ccn2nccc2c1 | 0.3333 |
| JOB05 | Reinforcement_learning_DockStream_demo_595 | c1ccn2nc3c(c2c1)CCCNC3 | RefCore10 | C1=Nc2nccnc2C1 | 0.2683 |
| JOB05 | Reinforcement_learning_DockStream_demo_601 | c1ccn2nc3c(c2c1)CCC[NH2+]C3 | RefCore10 | C1=Nc2nccnc2C1 | 0.2683 |
| JOB05 | Reinforcement_learning_DockStream_demo_602 | c1ccc2ncncc2c1 | RefCore48 | c1ccn2nccc2c1 | 0.4800 |
| JOB05 | Reinforcement_learning_DockStream_demo_604 | c1ccn2nc3c(c2c1)CC[NH2+][C@@H]1CCCC[C@H]31 | RefCore10 | C1=Nc2nccnc2C1 | 0.2609 |
| JOB05 | Reinforcement_learning_DockStream_demo_607 | c1ccc2ocnc2c1 | RefCore48 | c1ccn2nccc2c1 | 0.3333 |
| JOB05 | Reinforcement_learning_DockStream_demo_611 | c1ccn2nc3c(c2c1)CCNC3 | RefCore10 | C1=Nc2nccnc2C1 | 0.2821 |
| JOB05 | Reinforcement_learning_DockStream_demo_612 | c1ccn2nc3c(c2c1)CC[NH2+]CC3 | RefCore10 | C1=Nc2nccnc2C1 | 0.2895 |
| JOB05 | Reinforcement_learning_DockStream_demo_617 | C1CCC2NNCC2C1 | RefCore21 | c1ccc2c(c1)CN=N2 | 0.0286 |
| JOB05 | Reinforcement_learning_DockStream_demo_627 | C1CCC2NNCC2C1 | RefCore21 | c1ccc2c(c1)CN=N2 | 0.0286 |
| JOB05 | Reinforcement_learning_DockStream_demo_630 | C1CCC2NNCC2C1 | RefCore21 | c1ccc2c(c1)CN=N2 | 0.0286 |
| JOB05 | Reinforcement_learning_DockStream_demo_637 | c1ccn2nc3c(c2c1)CC[NH2+]CC3 | RefCore10 | C1=Nc2nccnc2C1 | 0.2895 |
| JOB05 | Reinforcement_learning_DockStream_demo_64 | c1ccn2nc3c(c2c1)CC[NH2+][C@@H]1CCCC[C@H]31 | RefCore10 | C1=Nc2nccnc2C1 | 0.2609 |
| JOB05 | Reinforcement_learning_DockStream_demo_641 | C1=Cc2ccccc2NC1 | RefCore35 | c1cnn2ccnc2c1 | 0.3000 |
| JOB05 | Reinforcement_learning_DockStream_demo_659 | C1CCC2NNCC2C1 | RefCore21 | c1ccc2c(c1)CN=N2 | 0.0286 |
| JOB05 | Reinforcement_learning_DockStream_demo_661 | c1cnc2c(c1)C[NH2+]CC2 | RefCore5 | c1cc2cncnn2c1 | 0.3429 |
| JOB05 | Reinforcement_learning_DockStream_demo_662 | c1ccc2ocnc2c1 | RefCore48 | c1ccn2nccc2c1 | 0.3333 |
| JOB05 | Reinforcement_learning_DockStream_demo_676 | c1ccn2cccc2c1 | RefCore10 | C1=Nc2nccnc2C1 | 0.4167 |
| JOB05 | Reinforcement_learning_DockStream_demo_685 | c1ccn2nc3c(c2c1)CC[NH2+]C3 | RefCore10 | C1=Nc2nccnc2C1 | 0.2821 |
| JOB05 | Reinforcement_learning_DockStream_demo_690 | c1ccn2nc3c(c2c1)CC[NH2+]C3 | RefCore10 | C1=Nc2nccnc2C1 | 0.2821 |
| JOB05 | Reinforcement_learning_DockStream_demo_694 | c1ccn2nc3ccncc3c2c1 | RefCore10 | C1=Nc2nccnc2C1 | 0.3429 |
| JOB05 | Reinforcement_learning_DockStream_demo_705 | C1CCC2NNCC2C1 | RefCore21 | c1ccc2c(c1)CN=N2 | 0.0286 |
| JOB05 | Reinforcement_learning_DockStream_demo_707 | C1CCC2NNCC2C1 | RefCore21 | c1ccc2c(c1)CN=N2 | 0.0286 |
| JOB05 | Reinforcement_learning_DockStream_demo_715 | c1ccn2nc3c(c2c1)C[NH2+]CC3 | RefCore10 | C1=Nc2nccnc2C1 | 0.2821 |
| JOB05 | Reinforcement_learning_DockStream_demo_716 | c1cc2c(cn1)cc1cncnn12 | RefCore4 | c1cc2sccc2cn1 | 0.3514 |
| JOB05 | Reinforcement_learning_DockStream_demo_717 | C1CNC2NCCC2C1 | RefCore25 | c1cc2nc[nH]c2cn1 | 0.0588 |
| JOB05 | Reinforcement_learning_DockStream_demo_719 | C1CCC2NNCC2C1 | RefCore21 | c1ccc2c(c1)CN=N2 | 0.0286 |
| JOB05 | Reinforcement_learning_DockStream_demo_736 | C1CNC2NCCC2C1 | RefCore25 | c1cc2nc[nH]c2cn1 | 0.0588 |
| JOB05 | Reinforcement_learning_DockStream_demo_740 | C1CCC2NCCC2C1 | RefCore21 | c1ccc2c(c1)CN=N2 | 0.0294 |
| JOB05 | Reinforcement_learning_DockStream_demo_742 | c1ccc2[nH+]cccc2c1 | RefCore48 | c1ccn2nccc2c1 | 0.2593 |
| JOB05 | Reinforcement_learning_DockStream_demo_747 | C1CCC2NNCC2C1 | RefCore21 | c1ccc2c(c1)CN=N2 | 0.0286 |
| JOB05 | Reinforcement_learning_DockStream_demo_75 | c1ccc2ncncc2c1 | RefCore48 | c1ccn2nccc2c1 | 0.4800 |
| JOB05 | Reinforcement_learning_DockStream_demo_759 | c1cc2c[nH+]ccn2c1 | RefCore4 | c1cc2sccc2cn1 | 0.2647 |
| JOB05 | Reinforcement_learning_DockStream_demo_76 | c1ccn2nc3c(c2c1)CCCNC3 | RefCore10 | C1=Nc2nccnc2C1 | 0.2683 |
| JOB05 | Reinforcement_learning_DockStream_demo_769 | C1CNC2NCCC2C1 | RefCore25 | c1cc2nc[nH]c2cn1 | 0.0588 |
| JOB05 | Reinforcement_learning_DockStream_demo_78 | c1ccn2nc3c(c2c1)CCCNC3 | RefCore10 | C1=Nc2nccnc2C1 | 0.2683 |
| JOB05 | Reinforcement_learning_DockStream_demo_798 | C1CCC2NNCC2C1 | RefCore21 | c1ccc2c(c1)CN=N2 | 0.0286 |
| JOB05 | Reinforcement_learning_DockStream_demo_80 | c1ccn2nc3c(c2c1)CCCNC3 | RefCore10 | C1=Nc2nccnc2C1 | 0.2683 |
| JOB05 | Reinforcement_learning_DockStream_demo_801 | C1CNC2NCCC2C1 | RefCore25 | c1cc2nc[nH]c2cn1 | 0.0588 |
| JOB05 | Reinforcement_learning_DockStream_demo_809 | C1CCC2NNCC2C1 | RefCore21 | c1ccc2c(c1)CN=N2 | 0.0286 |
| JOB05 | Reinforcement_learning_DockStream_demo_81 | c1ccc2ncncc2c1 | RefCore48 | c1ccn2nccc2c1 | 0.4800 |
| JOB05 | Reinforcement_learning_DockStream_demo_815 | c1ccn2nc3c(c2c1)CCCNC3 | RefCore10 | C1=Nc2nccnc2C1 | 0.2683 |
| JOB05 | Reinforcement_learning_DockStream_demo_828 | c1cnc2c(c1)C[NH2+]CC2 | RefCore5 | c1cc2cncnn2c1 | 0.3429 |
| JOB05 | Reinforcement_learning_DockStream_demo_83 | c1ccn2nc3c(c2c1)CCCNC3 | RefCore10 | C1=Nc2nccnc2C1 | 0.2683 |
| JOB05 | Reinforcement_learning_DockStream_demo_84 | c1ccn2nc3c(c2c1)CCCNC3 | RefCore10 | C1=Nc2nccnc2C1 | 0.2683 |
| JOB05 | Reinforcement_learning_DockStream_demo_845 | C1CCC2NNCC2C1 | RefCore21 | c1ccc2c(c1)CN=N2 | 0.0286 |
| JOB05 | Reinforcement_learning_DockStream_demo_848 | C1CCC2NNCC2C1 | RefCore21 | c1ccc2c(c1)CN=N2 | 0.0286 |
| JOB05 | Reinforcement_learning_DockStream_demo_851 | C1C2CC3CC1CC(C2)C3 | RefCore37 | C1=Cc2ccccc2[N]1 | 0.0435 |
| JOB05 | Reinforcement_learning_DockStream_demo_865 | C1CCC2NCCC2C1 | RefCore21 | c1ccc2c(c1)CN=N2 | 0.0294 |
| JOB05 | Reinforcement_learning_DockStream_demo_866 | C1CCC2NCCC2C1 | RefCore21 | c1ccc2c(c1)CN=N2 | 0.0294 |
| JOB05 | Reinforcement_learning_DockStream_demo_869 | c1ccn2nc3c(c2c1)CCCNC3 | RefCore10 | C1=Nc2nccnc2C1 | 0.2683 |
| JOB05 | Reinforcement_learning_DockStream_demo_870 | c1ccc2c(c1)CCNC2 | RefCore6 | C1=Nc2ncccc2C1 | 0.2667 |
| JOB05 | Reinforcement_learning_DockStream_demo_88 | c1ccn2nc3c(c2c1)CC[NH2+][C@@H]1CCCC[C@H]31 | RefCore10 | C1=Nc2nccnc2C1 | 0.2609 |
| JOB05 | Reinforcement_learning_DockStream_demo_880 | c1ccc2ccccc2c1 | RefCore48 | c1ccn2nccc2c1 | 0.3889 |
| JOB05 | Reinforcement_learning_DockStream_demo_882 | c1ccn2nc3c(c2c1)C[NH2+]CC3 | RefCore10 | C1=Nc2nccnc2C1 | 0.2821 |
| JOB05 | Reinforcement_learning_DockStream_demo_889 | C1CNC2NCCC2C1 | RefCore25 | c1cc2nc[nH]c2cn1 | 0.0588 |
| JOB05 | Reinforcement_learning_DockStream_demo_902 | c1cn2ccsc2n1 | RefCore44 | c1ccn2ncnc2c1 | 0.3448 |
| JOB05 | Reinforcement_learning_DockStream_demo_905 | C1N[C@@H]2CN[C@H]1C2 | RefCore37 | C1=Cc2ccccc2[N]1 | 0.0741 |
| JOB05 | Reinforcement_learning_DockStream_demo_913 | C1CNC2NCCC2C1 | RefCore25 | c1cc2nc[nH]c2cn1 | 0.0588 |
| JOB05 | Reinforcement_learning_DockStream_demo_92 | c1ccn2nc3c(c2c1)CCCC[NH2+]3 | RefCore10 | C1=Nc2nccnc2C1 | 0.2750 |
| JOB05 | Reinforcement_learning_DockStream_demo_921 | C1C[C@H]2CNC[C@@H]1N2 | RefCore21 | c1ccc2c(c1)CN=N2 | 0.0333 |
| JOB05 | Reinforcement_learning_DockStream_demo_924 | c1ccn2nc3c(c2c1)CCCNC3 | RefCore10 | C1=Nc2nccnc2C1 | 0.2683 |
| JOB05 | Reinforcement_learning_DockStream_demo_929 | c1ccn2nc3c(c2c1)CCC3 | RefCore10 | C1=Nc2nccnc2C1 | 0.3143 |
| JOB05 | Reinforcement_learning_DockStream_demo_931 | c1ccc2occc2c1 | RefCore32 | C1=NCc2ccccc21 | 0.3000 |
| JOB05 | Reinforcement_learning_DockStream_demo_935 | C1CCC2NNCC2C1 | RefCore21 | c1ccc2c(c1)CN=N2 | 0.0286 |
| JOB05 | Reinforcement_learning_DockStream_demo_937 | C1CNC2CNNC2C1 | RefCore9 | c1ccc2[nH]cnc2c1 | 0.0541 |
| JOB05 | Reinforcement_learning_DockStream_demo_943 | C1CNC2NCCC2C1 | RefCore25 | c1cc2nc[nH]c2cn1 | 0.0588 |
| JOB05 | Reinforcement_learning_DockStream_demo_945 | c1ccc2ocnc2c1 | RefCore48 | c1ccn2nccc2c1 | 0.3333 |
| JOB05 | Reinforcement_learning_DockStream_demo_946 | C1CNC2NCCC2C1 | RefCore25 | c1cc2nc[nH]c2cn1 | 0.0588 |
| JOB05 | Reinforcement_learning_DockStream_demo_950 | c1ccc2ccccc2c1 | RefCore48 | c1ccn2nccc2c1 | 0.3889 |
| JOB05 | Reinforcement_learning_DockStream_demo_951 | C1CCC2NNCC2C1 | RefCore21 | c1ccc2c(c1)CN=N2 | 0.0286 |
| JOB05 | Reinforcement_learning_DockStream_demo_952 | C1CNC2NCCC2C1 | RefCore25 | c1cc2nc[nH]c2cn1 | 0.0588 |
| JOB05 | Reinforcement_learning_DockStream_demo_953 | c1ccc2ocnc2c1 | RefCore48 | c1ccn2nccc2c1 | 0.3333 |
| JOB05 | Reinforcement_learning_DockStream_demo_956 | C1CC2CCNC2CN1 | RefCore21 | c1ccc2c(c1)CN=N2 | 0.0286 |
| JOB05 | Reinforcement_learning_DockStream_demo_966 | c1ccn2nc3ccncc3c2c1 | RefCore10 | C1=Nc2nccnc2C1 | 0.3429 |
| JOB05 | Reinforcement_learning_DockStream_demo_976 | c1ccc2ncncc2c1 | RefCore48 | c1ccn2nccc2c1 | 0.4800 |
| JOB05 | Reinforcement_learning_DockStream_demo_98 | c1ccc2ncncc2c1 | RefCore48 | c1ccn2nccc2c1 | 0.4800 |
| JOB05 | Reinforcement_learning_DockStream_demo_983 | C1CCC2NNCC2C1 | RefCore21 | c1ccc2c(c1)CN=N2 | 0.0286 |
| JOB05 | Reinforcement_learning_DockStream_demo_99 | c1ccn2nc3c(c2c1)CC[NH+]1CCCC[C@@H]31 | RefCore10 | C1=Nc2nccnc2C1 | 0.2667 |
| JOB05 | Reinforcement_learning_DockStream_demo_998 | c1ccn2nc3c(c2c1)CCCNC3 | RefCore10 | C1=Nc2nccnc2C1 | 0.2683 |
| JOB05 | Reinforcement_learning_DockStream_demo_1817 | C1CCC2NNCC2C1 | RefCore21 | c1ccc2c(c1)CN=N2 | 0.0286 |
| JOB05 | Reinforcement_learning_DockStream_demo_2165 | C1CCC2NNCC2C1 | RefCore21 | c1ccc2c(c1)CN=N2 | 0.0286 |
| JOB05 | Reinforcement_learning_DockStream_demo_2231 | C1CCC2NNCC2C1 | RefCore21 | c1ccc2c(c1)CN=N2 | 0.0286 |
| JOB05 | Reinforcement_learning_DockStream_demo_2240 | C1CCC2NNCC2C1 | RefCore21 | c1ccc2c(c1)CN=N2 | 0.0286 |
| JOB05 | Reinforcement_learning_DockStream_demo_2515 | c1cnc2nccn2c1 | RefCore31 | c1ccc2c(c1)CN=N2 | 0.4615 |
| JOB05 | Reinforcement_learning_DockStream_demo_2530 | C1CCC2NNCC2C1 | RefCore21 | c1ccc2c(c1)CN=N2 | 0.0286 |
| JOB05 | Reinforcement_learning_DockStream_demo_2840 | c1ncc2c(n1)NCCC2 | RefCore17 | c1cc2nccn2cn1 | 0.3429 |
| JOB05 | Reinforcement_learning_DockStream_demo_3326 | c1cnc2ncncc2c1 | RefCore1 | c1ncc2cc[nH]c2n1 | 0.4000 |
| JOB05 | Reinforcement_learning_DockStream_demo_3396 | C1CCC2NNCC2C1 | RefCore21 | c1ccc2c(c1)CN=N2 | 0.0286 |
| JOB05 | Reinforcement_learning_DockStream_demo_3673 | C1CNC2NNCC2C1 | RefCore21 | c1ccc2c(c1)CN=N2 | 0.0263 |
| JOB05 | Reinforcement_learning_DockStream_demo_3694 | C1CC2CNCNC2N1 | RefCore25 | c1cc2nc[nH]c2cn1 | 0.0541 |
| JOB05 | Reinforcement_learning_DockStream_demo_3993 | C1CCC2NNCC2C1 | RefCore21 | c1ccc2c(c1)CN=N2 | 0.0286 |
| JOB05 | Reinforcement_learning_DockStream_demo_4031 | C1CCC2NNCC2C1 | RefCore21 | c1ccc2c(c1)CN=N2 | 0.0286 |
| JOB05 | Reinforcement_learning_DockStream_demo_4095 | C1CCC2NNCC2C1 | RefCore21 | c1ccc2c(c1)CN=N2 | 0.0286 |

**Table S7.** Tanimoto similarity scores (Morgan fingerprints) between core scaffolds from multi-objective campaign-generated molecules and reference kinase hinge-binding cores curated from the in-house collection.

| JOBS | GEN_MOLS_CORES_ID | GEN_MOLS_CORES | RefCores_ID | RefCores |
| --- | --- | --- | --- | --- |
| Job01_288041 | c1cnn2cccc2c1 | RefCore10 | c1ccn2nccc2c1 | 0.6818 |
| Job01_332784 | c1cnc2[nH]ccc2c1 | RefCore0 | c1ncc2cc[nH]c2n1 | 0.4828 |
| Job01_347887 | c1ccc2[nH]ncc2c1 | RefCore2 | c1cc2[nH]ncc2cn1 | 0.5385 |
| Job02_110838 | c1cc2cc[nH]c2cn1 | RefCore23 | c1ncc2c(n1)N=NC2 | 0.4333 |
| Job02_123123 | c1ccc2[nH]ccc2c1 | RefCore8 | c1ccc2[nH]cnc2c1 | 0.3333 |
| Job02_169052 | c1ccc2cnncc2c1 | RefCore48 | c1cn2nccc2cn1 | 0.3636 |
| Job02_189652 | c1cc2[nH]cnc2cn1 | RefCore23 | c1ncc2c(n1)N=NC2 | 0.6923 |
| Job02_39139 | c1ccc2cnncc2c1 | RefCore48 | c1cn2nccc2cn1 | 0.3636 |
| Job02_40038 | c1ccc2[nH]ncc2c1 | RefCore2 | c1cc2[nH]ncc2cn1 | 0.5385 |
| Job02_94392 | c1ccc2cnncc2c1 | RefCore48 | c1cn2nccc2cn1 | 0.3636 |
| Job03_12934 | c1ncc2ncncc2n1 | RefCore36 | C1=Cc2ccccc2[N]1 | 0.4783 |
| Job03_28203 | c1ccc2nccnc2c1 | RefCore48 | c1cn2nccc2cn1 | 0.5789 |
| Job03_30132 | c1ncc2nn[nH]c2n1 | RefCore36 | C1=Cc2ccccc2[N]1 | 0.5000 |
| Job03_37784 | c1ccc2n[nH]cc2c1 | RefCore48 | c1cn2nccc2cn1 | 0.3846 |
| Job03_86676 | c1ccc2ncncc2c1 | RefCore48 | c1cn2nccc2cn1 | 0.4800 |
| Job04_40386 | c1ccc2nccnc2c1 | RefCore48 | c1cn2nccc2cn1 | 0.5789 |
| Job04_40844 | c1ccc2cnncc2c1 | RefCore48 | c1cn2nccc2cn1 | 0.3636 |
| Job04_50062 | c1ccc2cnncc2c1 | RefCore48 | c1cn2nccc2cn1 | 0.3636 |
| Job04_8773 | c1ccc2n[nH]cc2c1 | RefCore48 | c1cn2nccc2cn1 | 0.3846 |
| Job04_12448 | c1ccc2occc2c1 | RefCore32 | c1ccn2ccnc2c1 | 0.3000 |
| Job04_2351 | c1ccc2cnccc2c1 | RefCore2 | c1cc2[nH]ncc2cn1 | 0.4074 |
| Job04_31317 | c1ccc2cnccc2c1 | RefCore2 | c1cc2[nH]ncc2cn1 | 0.4074 |
| Job04_31812 | c1ccc2sccc2c1 | RefCore3 | c1cc2sccc2cn1 | 0.4615 |
| Job04_40017 | c1ccc2cnccc2c1 | RefCore2 | c1cc2[nH]ncc2cn1 | 0.4074 |
| Job04_59666 | c1ccc2scnc2c1 | RefCore48 | c1cn2nccc2cn1 | 0.3333 |
| Job05_43 | c1ccc2n[nH]cc2c1 | RefCore48 | c1cn2nccc2cn1 | 0.3846 |
| Job05_119 | c1ccc2nccnc2c1 | RefCore48 | c1cn2nccc2cn1 | 0.5789 |
| Job05_686 | c1cnc2ncncc2c1 | RefCore1 | c1ncc2cn[nH]c2n1 | 0.4000 |
| Job05_2124 | c1ccc2[nH]ccc2c1 | RefCore8 | c1ccc2[nH]cnc2c1 | 0.3333 |
| Job05_3606 | c1ccc2c(c1)cnc1ccccc12 | RefCore48 | c1cn2nccc2cn1 | 0.4231 |
| Job05_542 | c1ccc2ncncc2c1 | RefCore48 | c1cn2nccc2cn1 | 0.4800 |
| Job05_783 | c1ccc2ncncc2c1 | RefCore48 | c1cn2nccc2cn1 | 0.4800 |
| Job05_821 | c1ccc2c(c1)[nH]c1ccccc12 | RefCore8 | c1ccc2[nH]cnc2c1 | 0.3200 |
| Job05_1855 | c1ccc2ncncc2c1 | RefCore48 | c1cn2nccc2cn1 | 0.4800 |
| Job05_3954 | c1cnc2ncncc2c1 | RefCore1 | c1ncc2cn[nH]c2n1 | 0.4000 |
